# Supplementary material for: An In Vivo CRISPR Screen Identifies Stepwise Genetic Dependencies of Metastatic Progression
Source: Oxford University Press journal article supplement (doi:10.1158/0008-5472.can-21-3908), 2021-12-16
Supplement: can-21-3908_table_s1_supps1.xlsx [file can-21-3908_table_s1_supps1.xlsx]

## Sheet: Sheet1
Table S1. sgRNA sequences for selected candidate genes. The table shows the target gene name and the sgRNA sequence (5’ to 3’) used for generating the knockout cell lines.
Target Gene	Sequence (5’à 3’)
RFP Oligo 1 sgNRA 1	CACCGAGGACAGCTTCAAGTAGTCG
RFP Oligo 2 sgNRA 1	AAACCGACTACTTGAAGCTGTCCTC
RFP Oligo 1 sgNRA 2	CACCGGTGATGAACTTCGAGGACGG
RFP Oligo 2 sgNRA 2	AAACCCGTCCTCGAAGTTCATCACC
RFP Oligo 1 sgNRA 3	CACCGGGCCACGAGTTCGAGATCGA
RFP Oligo 2 sgNRA 3	AAACTCGATCTCGAACTCGTGGCCC
Non-targeting sgRNA Oligo 1	CACCGTAGACAACCGCGGAGAATGC
Non-targeting sgRNA Oligo 2	AAACGCATTCTCCGCGGTTGTCTAC
CSNK1A1L Oligo 1 sgRNA 1	CACCGCGCTGTCGTGGCGATGTCGT
CSNK1A1L Oligo 2 sgRNA 1	AAACACGACATCGCCACGACAGCGC
CSNK1A1L Oligo 1 sgRNA 2	CACCGTGCTACGTCCTCGCCGTTGG
CSNK1A1L Oligo 2 sgRNA 2	AAACCCAACGGCGAGGACGTAGCAC
CDH7 Oligo 1 sgRNA 1	CACCGCATCCGAAAGAACGTGCGCT
CDH7 Oligo 2 sgRNA 1	AAACAGCGCACGTTCTTTCGGATGC
CDH7 Oligo 1 sgRNA 2	CACCGAACCGGCTCGACACCCGCTC
CDH7 Oligo 2 sgRNA 2	AAACGAGCGGGTGTCGAGCCGGTTC
IL18R1 Oligo 1 sgRNA 1	CACCGTCAGGGAGGATTCTACGCCA
IL18R1 Oligo 2 sgRNA 1	AAACTGGCGTAGAATCCTCCCTGAC
IL18R1 Oligo 1 sgRNA 2	CACCGGGTCCTGGAGCACGGCTGCG
IL18R1 Oligo 2 sgRNA 2	AAACCGCAGCCGTGCTCCAGGACCC
ITGA2 Oligo 1 sgRNA 1	CACCGGATGGGGCCAGAACGGACAG
ITGA2 Oligo 2 sgRNA 1	AAACCTGTCCGTTCTGGCCCCATCC
ITGA2 Oligo 1 sgRNA 2	CACCGACACTCTAGAAGCTGTCCAG
ITGA2 Oligo 2 sgRNA 2	AAACCTGGACAGCTTCTAGAGTGTC
CSNK2A2 Oligo 1 sgRNA 1	CACCGCCTCCTCCTCCAGCGCCCGG
CSNK2A2 Oligo 2 sgRNA 1	AAACCCGGGCGCTGGAGGAGGAGGC
CSNK2A2 Oligo 1 sgRNA 2	CACCGAGCGGGCCGCCGGGCGCTGG
CSNK2A2 Oligo 2 sgRNA 2	AAACCCAGCGCCCGGCGGCCCGCTC
IL1RAPL1 Oligo 1 sgRNA 1	CACCGCTGTACAAGGAAAACCCCGT
IL1RAPL1 Oligo 2 sgRNA 1	AAACACGGGGTTTTCCTTGTACAGC
IL1RAPL1 Oligo 1 sgRNA 2	CACCGCCTTACCGACTAATATCCAG
IL1RAPL1 Oligo 2 sgRNA 2	AAACCTGGATATTAGTCGGTAAGGC
IL27 Oligo 1 sgRNA 1	CACCGAGCCAAGGTCGCCTGCCGTC
IL27 Oligo 2 sgRNA 1	AAACGACGGCAGGCGACCTTGGCTC
IL27 Oligo 1 sgRNA 2	CACCGGGCCAGACGGCAGGCGACCT
IL27 Oligo 2 sgRNA 2	AAACAGGTCGCCTGCCGTCTGGCCC
PCDHGA1 Oligo 1 sgRNA 1	CACCGCGCCGGTAGAACCATCTGTG
PCDHGA1 Oligo 2 sgRNA 1	AAACCACAGATGGTTCTACCGGCGC
PCDHGA1 Oligo 1 sgRNA 2	CACCGACAGACAAAGGTTCCTTCGT
PCDHGA1 Oligo 2 sgRNA 2	AAACACGAAGGAACCTTTGTCTGTC
PCDHGA2 Oligo 1 sgRNA 1	CACCGATTCCGGAGAATACGCTCGT
PCDHGA2 Oligo 2 sgRNA 1	AAACACGAGCGTATTCTCCGGAATC
PCDHGA2 Oligo 1 sgRNA 2	CACCGGCTTCCTTTTGGCGACCCTG
PCDHGA2 Oligo 2 sgRNA 2	AAACCAGGGTCGCCAAAAGGAAGCC
PLK1 Oligo 1 sgRNA 1	CACCGCGCCGCGTTTGAATTCGGGG
PLK1 Oligo 2 sgRNA 1	AAACCCCCGAATTCAAACGCGGCGC
PLK1 Oligo 1 sgRNA 2	CACCGGATCTCGGACGCGGACACCA
PLK1 Oligo 2 sgRNA 2	AAACTGGTGTCCGCGTCCGAGATCC
