# Supplementary material for: An In Vivo CRISPR Screen Identifies Stepwise Genetic Dependencies of Metastatic Progression
Source: Oxford University Press journal article supplement (doi:10.1158/0008-5472.can-21-3908), 2021-12-16
Supplement: can-21-3908_table_s3_supps3.xlsx [file can-21-3908_table_s3_supps3.xlsx]

## Sheet: Sheet1
Table S3. Genes specifically depleted in CTC clusters of CRISPR-CDX-BR16 mice. The table shows the 365 genes that are significantly depleted in CTC clusters when compared to single CTCs.
Genes	log2FoldChange	pvalue	padj
APITD1-CORT	-30	1.76e-32	3.28e-30
TM7SF3	-30	1.68e-32	3.28e-30
BMP5	-30	6.86e-25	2.59e-23
BRSK2	-30	6.83e-25	2.59e-23
C2orf76	-30	6.74e-25	2.59e-23
C9orf43	-30	6.7e-25	2.59e-23
CCKBR	-30	7.19e-25	2.59e-23
CDC25A	-30	6.43e-25	2.59e-23
CDH7	-30	7.01e-25	2.59e-23
CNTN5	-30	7.06e-25	2.59e-23
COL27A1	-30	7.09e-25	2.59e-23
DNAJC30	-30	6.96e-25	2.59e-23
ELAVL2	-30	6e-25	2.59e-23
FAM83C	-30	7.06e-25	2.59e-23
FLJ25363	-30	6.75e-25	2.59e-23
FOCAD	-30	7.01e-25	2.59e-23
GALR3	-30	6.82e-25	2.59e-23
GCA	-30	6.31e-25	2.59e-23
H2AFX	-30	6.68e-25	2.59e-23
IL18R1	-30	6.73e-25	2.59e-23
INO80	-30	6e-25	2.59e-23
MAS1L	-30	7.13e-25	2.59e-23
MOGAT1	-30	6.86e-25	2.59e-23
MPZL2	-30	6.94e-25	2.59e-23
NDUFA4L2	-30	6.52e-25	2.59e-23
OR2AG2	-30	6.63e-25	2.59e-23
OR4K2	-30	6.59e-25	2.59e-23
PPP1R18	-30	6.78e-25	2.59e-23
RET	-30	6.81e-25	2.59e-23
SELP	-30	7.22e-25	2.59e-23
SMG6	-30	6.85e-25	2.59e-23
SPATA31D1	-30	6.29e-25	2.59e-23
TKTL2	-30	6.77e-25	2.59e-23
TRIM62	-30	6.99e-25	2.59e-23
UROC1	-30	6.54e-25	2.59e-23
NonTargetingControlGuideForHuman_0042	-30	6.63e-25	2.59e-23
ELSPBP1	-29.993	6.58e-25	2.59e-23
MSR1	-29.9868	7.17e-25	2.59e-23
C1orf122	-29.9599	7.7e-25	2.65e-23
KRT80	-29.9549	8.41e-25	2.73e-23
FOXN1	-29.9497	7.87e-25	2.65e-23
PLD6	-29.9473	8.06e-25	2.66e-23
BTBD18	-29.8949	9.57e-25	3.01e-23
TMEM144	-29.8898	1.01e-24	3.03e-23
DKK2	-29.8839	1.01e-24	3.03e-23
ZNF558	-29.8641	1.16e-24	3.27e-23
MKKS	-29.8536	1.11e-24	3.27e-23
LOXL1	-29.8518	1.17e-24	3.27e-23
MTHFS	-29.8496	1.12e-24	3.27e-23
SEPT3	-29.837	1.26e-24	3.47e-23
ID4	-29.8233	1.31e-24	3.52e-23
FMNL1	-29.8186	1.36e-24	3.56e-23
UTP14A	-29.8112	1.33e-24	3.52e-23
SERPINB5	-29.7897	1.47e-24	3.74e-23
OR5AN1	-29.7822	1.5e-24	3.74e-23
SLC30A4	-29.7768	1.58e-24	3.76e-23
GID4	-29.7767	1.55e-24	3.76e-23
SLC4A1	-29.77	1.57e-24	3.76e-23
ANAPC5	-29.7679	1.57e-24	3.76e-23
TSPAN8	-29.7539	1.69e-24	3.88e-23
CSNK1A1L	-29.7494	1.64e-24	3.87e-23
PCIF1	-29.7467	1.74e-24	3.92e-23
STK31	-29.7406	1.71e-24	3.9e-23
ADAM2	-29.7389	1.87e-24	4.11e-23
NonTargetingControlGuideForHuman_0877	-29.7315	1.84e-24	4.1e-23
UCMA	-29.7158	1.96e-24	4.23e-23
ERCC4	-29.7156	1.98e-24	4.23e-23
C6	-29.6993	1.99e-24	4.23e-23
FMN1	-29.698	2.07e-24	4.28e-23
TRA2B	-29.6971	2.01e-24	4.23e-23
PPM1K	-29.6966	2.13e-24	4.33e-23
C1orf52	-29.6772	2.16e-24	4.33e-23
TBX3	-29.6705	2.22e-24	4.4e-23
S100A3	-29.6688	2.16e-24	4.33e-23
CPN2	-29.6577	2.39e-24	4.63e-23
MYCBP	-29.6513	2.31e-24	4.54e-23
ZNF235	-29.6098	2.86e-24	5.41e-23
CASZ1	-29.5711	3.22e-24	6.04e-23
LRRC10B	-29.5439	3.68e-24	6.85e-23
TSEN15	-29.4766	4.53e-24	8.18e-23
TMEM204	-29.4723	4.56e-24	8.18e-23
hsa-mir-6746	-29.4712	4.6e-24	8.19e-23
HLA-DMA	-29.4337	5.1e-24	9e-23
ITGA2	-29.3553	7.19e-24	1.24e-22
hsa-mir-4730	-29.333	7.19e-24	1.24e-22
DVL1	-29.2598	9.64e-24	1.64e-22
NT5C1B	-29.0809	1.8e-23	3e-22
ERVV-1	-28.9318	3.06e-23	4.82e-22
NUDT11	-28.8172	4.48e-23	7e-22
ST20-MTHFS	-28.4101	1.68e-22	2.46e-21
CEP97	-28.1736	4.06e-22	5.72e-21
NT5C1B-RDH14	-28.1434	4.56e-22	6.39e-21
SERGEF	-28.0064	6.61e-22	9.01e-21
ENTPD1	-26.8742	2.86e-20	3.68e-19
ARIH2	-26.2784	1.75e-19	2.15e-18
IGFBP5	-25.4531	2.39e-18	2.84e-17
CLCNKA	-22.5319	1.04e-26	1.41e-24
IL4	-20.602	1.41e-12	5.74e-12
ZNF730	-19.7909	1.01e-11	3.92e-11
AP5Z1	-19.162	4.52e-11	1.69e-10
RAVER1	-18.9678	7.21e-11	2.65e-10
SCN2B	-18.7821	1.08e-10	3.91e-10
SLC30A5	-18.5157	1.95e-10	6.97e-10
KRTAP19-5	-18.0907	5.17e-10	1.8e-09
ARID3B	-18.0702	6.48e-27	9.47e-25
PTPRE	-18.0253	5.96e-10	2.07e-09
OPALIN	-18.0159	6.01e-10	2.08e-09
MESP1	-17.8802	8.16e-10	2.79e-09
KCNT2	-17.8724	8.35e-10	2.84e-09
GNGT1	-17.6326	1.37e-09	4.6e-09
RBMXL1	-17.3438	2.59e-09	8.53e-09
AXIN2	-17.0767	4.47e-09	1.45e-08
PTPN14	-16.9891	5.44e-09	1.76e-08
FBLN1	-16.9652	5.66e-09	1.82e-08
TGOLN2	-16.8785	6.87e-09	2.19e-08
LRRC41	-16.7754	8.22e-09	2.6e-08
FANCC	-16.7263	9.12e-09	2.86e-08
FGFRL1	-16.5559	1.3e-08	4.04e-08
TMEM176A	-16.3377	2e-08	6.15e-08
IFITM1	-16.2923	2.17e-08	6.63e-08
TBX2	-16.2772	2.2e-08	6.73e-08
AGTRAP	-16.2726	3.04e-18	3.59e-17
IPP	-16.1946	2.84e-61	1.16e-58
MYOD1	-16.0235	3.72e-08	1.12e-07
CCDC157	-15.9589	4.28e-08	1.27e-07
SIAE	-15.9009	4.77e-08	1.41e-07
CSNK2A2	-15.8492	5.33e-08	1.57e-07
ATOH1	-15.8341	5.47e-08	1.61e-07
TMEM200C	-15.6385	7.71e-08	2.23e-07
CHCHD6	-15.5587	9.12e-08	2.61e-07
SASH3	-15.4857	1.03e-07	2.93e-07
DCTN4	-15.3793	1.28e-07	3.63e-07
SAMD9L	-15.3285	1.4e-07	3.95e-07
GRAMD1A	-15.2682	1.57e-07	4.4e-07
TEX36	-15.2295	1.72e-07	4.78e-07
VAMP2	-15.1867	1.85e-07	5.12e-07
CNDP2	-15.1502	1.98e-07	5.46e-07
AQPEP	-15.0788	2.24e-07	6.14e-07
hsa-mir-4705	-15.0782	2.23e-07	6.12e-07
DEPDC5	-15.0024	2.59e-07	7.02e-07
PATE3	-14.9178	3.04e-07	8.18e-07
TMED1	-14.8945	3.1e-07	8.32e-07
MMP9	-14.8605	3.32e-07	8.86e-07
PPP4R1	-14.7047	4.39e-07	1.17e-06
IRF9	-14.5784	5.43e-07	1.42e-06
FAM210B	-14.5228	6.18e-07	1.61e-06
hsa-mir-6838	-14.4818	6.48e-07	1.68e-06
PTEN	-14.4192	7.37e-07	1.9e-06
GRPR	-14.4063	7.57e-07	1.94e-06
BRAF	-14.1775	1.13e-06	2.88e-06
KLRK1	-14.1007	1.29e-06	3.27e-06
CEMP1	-14.0891	1.31e-06	3.31e-06
DEFB134	-14.0748	1.32e-06	3.34e-06
TRIM10	-14.0155	1.5e-06	3.76e-06
GPHN	-13.9945	9.25e-77	6.31e-74
HOOK1	-13.9884	1.58e-06	3.92e-06
LMO4	-13.9792	1.59e-06	3.95e-06
TRAPPC6B	-13.9781	1.58e-06	3.92e-06
SAMHD1	-13.9746	1.58e-06	3.92e-06
FUT1	-13.859	1.92e-06	4.72e-06
APOBEC3D	-13.8444	2e-06	4.92e-06
MIB1	-13.799	2.17e-06	5.31e-06
FOXR1	-13.7402	2.34e-06	5.72e-06
RHOT1	-13.7358	2.35e-06	5.74e-06
GPR85	-13.7061	2.53e-06	6.15e-06
NonTargetingControlGuideForHuman_0268	-13.6828	2.63e-06	6.38e-06
SAMD8	-13.6421	2.77e-06	6.68e-06
ATP2B1	-13.5579	3.24e-06	7.76e-06
CDC42EP1	-13.5353	3.36e-06	8.02e-06
CYB5D1	-13.5265	3.42e-06	8.17e-06
NRBF2	-13.3481	4.62e-06	1.08e-05
ARSI	-13.3071	4.8e-06	1.12e-05
FSCN3	-13.2988	4.9e-06	1.14e-05
FABP2	-13.2765	5.07e-06	1.18e-05
CAMSAP2	-13.2635	5.17e-06	1.2e-05
YIPF4	-13.2348	5.56e-06	1.29e-05
ASZ1	-13.1919	5.87e-06	1.36e-05
FAIM3	-13.0518	7.39e-06	1.7e-05
PIH1D2	-13.021	2.26e-23	3.67e-22
TMEM59	-12.9995	7.99e-06	1.84e-05
BTN2A2	-12.9539	8.57e-06	1.97e-05
THAP4	-12.9535	8.6e-06	1.98e-05
ZNF799	-12.8646	9.82e-06	2.25e-05
SETD1A	-12.7818	1.12e-05	2.56e-05
INPP5A	-12.7295	1.23e-05	2.79e-05
ANKRD34B	-12.709	1.26e-05	2.86e-05
CEP152	-12.6782	1.35e-05	3.03e-05
CHD1	-12.6222	1.47e-05	3.3e-05
NAA60	-12.616	1.45e-05	3.26e-05
LAMB4	-12.6066	1.48e-05	3.32e-05
ADM	-12.571	1.57e-05	3.52e-05
ADAMTSL1	-12.521	1.71e-05	3.81e-05
RNF24	-12.5163	1.7e-05	3.79e-05
KIAA0513	-12.448	1.9e-05	4.18e-05
METAP2	-12.324	5.43e-07	1.42e-06
ARHGAP6	-12.3188	2.31e-05	5.03e-05
SFXN2	-12.3013	2.35e-05	5.11e-05
SYTL2	-12.1778	2.83e-05	6.11e-05
TRDMT1	-12.0808	3.31e-05	7.1e-05
ZNF443	-12.0103	3.69e-05	7.87e-05
PDZK1	-11.8488	4.67e-05	9.88e-05
C22orf46	-11.7929	5.11e-05	0.000107
OR52E2	-11.7516	5.48e-05	0.000114
SPESP1	-11.7452	5.47e-05	0.000114
GCG	-11.7063	5.8e-05	0.00012
CCDC40	-11.6945	5.82e-05	0.000121
hsa-mir-6779	-11.6923	5.96e-05	0.000123
PRSS50	-11.674	6.12e-05	0.000127
AMZ1	-11.6441	6.44e-05	0.000133
CNP	-11.6281	6.49e-05	0.000134
hsa-mir-4773-1	-11.5689	7.06e-05	0.000145
IL1RAPL1	-11.4842	7.85e-05	0.000161
ATE1	-11.4196	8.6e-05	0.000176
NMB	-11.4101	8.83e-05	0.00018
HOXA6	-11.38	9.27e-05	0.000189
DDC	-11.3632	9.53e-05	0.000194
hsa-mir-589	-11.3341	9.82e-05	0.000199
USH2A	-11.3335	9.96e-05	0.000202
TEKT3	-11.2923	0.000104	0.00021
LRP11	-11.2909	0.000105	0.000213
SFTPA1	-11.216	1.41e-05	3.17e-05
ARVCF	-11.2134	0.000116	0.000233
PGC	-11.2051	0.00012	0.000242
MOV10	-11.2046	0.00012	0.00024
SECISBP2	-11.1664	0.000125	0.000249
SAA4	-11.1105	0.000133	0.000265
NBPF4	-11.0153	0.00015	0.000299
LIMK2	-10.9577	0.000169	0.000336
KCNK15	-10.944	0.00017	0.000336
BCL2L14	-10.9312	0.000173	0.000342
PLCB2	-10.8608	0.000192	0.000378
NEURL	-10.8591	0.000191	0.000377
ADORA2A	-10.8496	1.03e-10	3.75e-10
TMEM205	-10.8494	0.000195	0.000383
GIMAP1-GIMAP5	-10.8285	0.000198	0.000388
CETP	-10.8159	0.000201	0.000393
NBPF6	-10.7344	0.000221	0.000431
POLA1	-10.7093	0.000236	0.000458
MAP3K14	-10.678	0.000242	0.000468
KLF16	-10.6435	0.000254	0.000489
DGKQ	-10.5858	0.000277	0.000532
TBL2	-10.585	0.000277	0.000532
hsa-mir-3606	-10.5573	0.000286	0.000549
HMBS	-10.5312	0.000301	0.000575
CEP170	-10.4486	0.000332	0.000628
STRIP1	-10.4428	0.00033	0.000625
FKBP1A	-10.4222	0.000342	0.000646
SCUBE3	-10.4078	0.000345	0.000651
NonTargetingControlGuideForHuman_0941	-10.3975	0.000351	0.000661
hsa-mir-3688-1	-10.3274	0.000389	0.000727
IGFBPL1	-10.3254	0.000387	0.000725
EXOC6B	-10.3235	0.000389	0.000727
SLC10A2	-10.3094	0.000399	0.000743
RALGAPA2	-10.2538	0.000429	0.000796
GK5	-10.1709	0.000471	0.000868
VAX1	-10.1426	0.000494	0.000907
RPL36	-10.1343	0.000499	0.000916
ATPAF1	-10.0797	0.000539	0.000984
FZD6	-10.0712	0.000543	0.000992
KPNA3	-10.0674	0.000547	0.000998
SPIN2A	-10.0374	0.000565	0.00102927
CDC42EP2	-10.0135	0.000579	0.00105255
COMTD1	-9.92797	0.00064	0.0011594
HIST1H1A	-9.88839	0.000681	0.00122769
LIN28B	-9.87645	0.000682	0.00122769
ZNF850	-9.82935	0.000732	0.00131209
DCDC2B	-9.77212	0.000788	0.00141088
SPIN3	-9.76358	0.000798	0.00142896
LLGL1	-9.73705	0.000829	0.00147432
GABBR2	-9.67792	1.33e-16	1.27e-15
TMLHE	-9.60738	0.000959	0.00169164
GABPB2	-9.59234	0.00098	0.00172322
OR10H1	-9.56598	0.00102061	0.00179089
FBXO3	-9.44306	0.00118286	0.0020527
SPINK4	-9.41089	0.00121861	0.00211116
BLVRA	-9.37379	0.00128203	0.00221353
SENP7	-9.37338	0.00128769	0.00222143
FAM177A1	-9.36522	0.00129208	0.00222712
COL21A1	-9.33308	0.0013524	0.00232717
HIST1H2BE	-9.29599	1.2e-20	1.57e-19
VGLL1	-9.29149	0.00139744	0.00239261
IVL	-9.24108	0.0015117	0.00257317
NINJ1	-9.17596	3.49e-05	7.49e-05
KLHDC4	-9.16763	0.001647	0.00279416
CREBBP	-9.16331	0.0016268	0.00276219
KIF20B	-9.14965	0.0016784	0.00284272
SAA2-SAA4	-9.11363	0.00172225	0.00291217
SELO	-9.10134	0.00174276	0.00294198
C5orf46	-9.07475	0.00182067	0.0030634
hsa-mir-30a	-9.04208	0.00190866	0.00319567
SPACA7	-9.04182	3.02e-15	2.18e-14
CEP57L1	-9.04098	0.00190393	0.00319299
ASIC4	-8.99358	0.00199815	0.00333459
PTPN5	-8.98554	0.00202788	0.00338145
HKR1	-8.97593	0.00204589	0.0034087
MUC4	-8.92894	0.00215639	0.00358336
GIMAP1	-8.89009	0.00224137	0.00371022
hsa-mir-4283-1	-8.86174	0.00233516	0.00385612
USP17L22	-8.84587	0.00235854	0.00389159
PRPSAP2	-8.83422	0.002412	0.0039734
hsa-mir-3688-2	-8.82668	0.0024237	0.00398945
MYOCD	-8.81884	0.00243772	0.00400931
SLC48A1	-8.80627	0.00246992	0.004059
hsa-mir-653	-8.79699	0.00251483	0.00412617
GOLT1A	-8.76576	0.00258864	0.00424388
ACTR3C	-8.72731	0.00271631	0.00444251
CDK15	-8.6487	0.00296369	0.00484212
NBEAL1	-8.64735	0.00298698	0.00486186
MXD1	-8.63855	1.83e-05	4.06e-05
C9orf131	-8.63802	0.00296538	0.00484212
PDC	-8.63739	0.00297523	0.00485046
SPIN2B	-8.63386	0.00302611	0.00492164
C10orf53	-8.6006	0.00312031	0.00506679
hsa-mir-6131	-8.57814	0.00320106	0.00518968
EMR1	-8.53497	7e-08	2.03e-07
SLC9A3	-8.5151	0.00343947	0.00556297
UTP18	-8.4579	0.00369376	0.0059508
ZBTB44	-8.45693	0.0036938	0.0059508
KIAA1614	-8.45586	0.0036785	0.0059355
CLIC4	-8.40485	0.00384604	0.00618344
IFITM10	-8.367	0.00405827	0.00650723
AK8	-8.35775	0.00411302	0.00657955
RBM5	-8.32801	2.93e-09	9.62e-09
HRAS	-8.32222	7.54e-21	1e-19
ERLEC1	-8.27643	0.00447298	0.00712638
KIF5B	-8.27597	0.00444229	0.00708954
NEO1	-8.26452	0.00455627	0.00724894
MAN2C1	-8.24724	0.0046328	0.00734214
CEP19	-8.24642	0.00460613	0.00731121
OR4D9	-8.24436	0.0046112	0.00731358
ACP1	-8.17635	0.00495389	0.00780945
VPS41	-8.13228	0.00513923	0.00808836
CORO1B	-8.12664	0.0052438	0.00824659
KLF11	-8.12192	0.00529025	0.0083122
hsa-mir-128-1	-8.11061	0.00530396	0.00832201
XKRX	-8.10666	0.00532081	0.00833566
AZGP1	-8.00469	0.00595988	0.00925886
FBXL20	-7.98314	0.00610213	0.00945536
LOC100288814	-7.97815	0.00616552	0.00953489
TRPC6	-7.97404	0.00610485	0.00945536
ACAP1	-7.61902	0.000258	0.000496
DCAF8	-7.19225	0.000732	0.00131209
OR2L8	-7.18912	2.34e-06	5.72e-06
hsa-mir-4435-1	-6.96545	6.45e-07	1.67e-06
ANXA8L1	-6.9126	6.6e-05	0.000136
TMEM98	-6.73763	9.55e-09	2.98e-08
RRP36	-6.54939	0.00249308	0.00409378
MMD2	-6.24649	2.25e-05	4.91e-05
APOL2	-6.18982	0.00183211	0.00308011
ANAPC10	-5.92911	1.96e-13	8.94e-13
FAM219A	-5.6469	1.05e-06	2.68e-06
TRIM27	-5.55305	6.37e-06	1.48e-05
RASSF6	-5.4584	3.63e-05	7.77e-05
PFKFB1	-5.26983	0.000197	0.000387
MROH8	-5.14296	0.00045	0.00083
DEFA1	-5.05641	0.00564676	0.0088193
CNTFR	-5.03923	2.5e-05	5.42e-05
PRKAG2	-5.0365	0.000212	0.000415
HIST2H2BE	-4.86076	0.0014732	0.0025118
FCRL2	-4.8303	0.000147	0.000293
DDX31	-4.69461	2.74e-08	8.34e-08
FGF20	-4.19964	0.000344	0.00065
PCTP	-4.10772	0.000679	0.00122519
MEF2D	-3.85916	5.29e-05	0.000111
hsa-mir-20b	-3.82032	0.000456	0.000842
