# Supplementary material for: An In Vivo CRISPR Screen Identifies Stepwise Genetic Dependencies of Metastatic Progression
Source: Oxford University Press journal article supplement (doi:10.1158/0008-5472.can-21-3908), 2021-12-16
Supplement: can-21-3908_table_s5_supps5.xlsx [file can-21-3908_table_s5_supps5.xlsx]

## Sheet: Sheet1
Table S5. Primer sequences for real-time qPCR. The table shows the target genes and the primer sequences (5’ to 3’) used for assessing the expression of candidate genes.
Target Gene	Sequence (5’ --> 3’)
fwd_CSNK1A1L_1	GGTGGCAGCAGTACTGCTGCC
rev_CSNK1A1L_1	GGCTGGGCCACCACCTCTTTCT
fwd_CSNK1A1L_2	AGATCGGGTCTGGCTCCTTTGGAG
rev_CSNK1A1L_2	GTAGAGTTTGCTCTCATACAGCAACTGG
fwd_CDH7 _1	CTCCAGTCTGCCCCGCGC
rev_ CDH7 _1	CTGGGGCCTCGCTGCCCTC
fwd_CDH7_2	AGGCCGGGGCAGGGTCCC
rev_CDH7_2	GCGGGCTCTTGGGGACCCA
fwd_IL18R1_1	TGGAGCACGGCTGCGAGGAG
rev_IL18R1_1	CGGTCGGGCGAAGCTCCG
fwd_IL18R1_2	GCAACCTTTGGACCCCGCGATC
rev_IL18R1_2	GCGCTCCCTGGCGTAGAATCCT
fwd_ITGA2_1	AGGGTATCCTCTGCAAACCTCTGCAAAC
rev_ITGA2_1	CGATGCAGAGCGAAATCCCCGCT
fwd_ITGA2_2	TTTTCCCTGCTCTCACCGGGCG
rev_ITGA2_2	CGGGGGACCGTAGTTGCGC
fwd_CSNK2A2_1	AGCCCGCCCGCCCCCG
rev_CSNK2A2_1	GCAGAGGGTGGCGGCGGC
fwd_CSNK2A2_2	GCCCCCAGCCCGCCCG
rev_CSNK2A2_2	GAGGGTGGCGGCGGCGG
fwd_IL1RAPL1_1	GAGACACCTTCCCAAACAGCAGGG
rev_IL1RAPL1_1	GTCCCCAAGTAAAATTTCCAGATCCGGG
fwd_IL1RAPL1_2	GGAGTAAAACGTGGATTTTTCTGAATACGCATTG
rev_IL1RAPL1_2	GCCCAAGTTTGCTCATGCCACTGATG
fwd_IL27_1	TGAAACCGGGCACAGCCCCCA
rev_IL27_1	CAGCCAAGCTCGTCCATTCTCTGC
fwd_IL27_2	AACCGGGCACAGCCCCCAGTATAA
rev_IL27_2	CCAGCCAAGCTCGTCCATTCTCTG
fwd_PCDHGA1_1	CCCTCAGCAGCAACGTGTCTCTCA
rev_PCDHGA1_1	CCACCGCCACCACCTTGGTCA
fwd_PCDHGA1_2	GATGCTTCTGTGTCTTTCTCTGGAGCTG
rev_PCDHGA1_2	GAGACGATGCGGACTCCGCC
fwd_PCDHGA2_1	TCTGCGTGAAGGTCCTGGATGCGA
rev_PCDHGA2_1	CTCTAGAAAATATACCACTTGAGCGTAGTAGC
fwd_PCDHGA2_2	CGACAGGAGGGAAATGGCGGC
rev_PCDHGA2_2	CGATGTTGCCTACGAAGGAGCCTC
fwd_PLK1_1	CGGCGGGCGGGTTTGGATTTTAAATC
rev_PLK1_1	CACTGCAGCACTCATGCTCCCGAA
fwd_PLK1_2	GGCGGCGCTATGTGCGGGG
rev_PLK1_2	CCATGGACATCTTCTCCCTCTGGTG
fwd_CSNK1A1L_1	GGTGGCAGCAGTACTGCTGCC
rev_CSNK1A1L_1	GGCTGGGCCACCACCTCTTTCT
