# Supplementary material for: An In Vivo CRISPR Screen Identifies Stepwise Genetic Dependencies of Metastatic Progression
Source: Oxford University Press journal article supplement (doi:10.1158/0008-5472.can-21-3908), 2021-12-16
Supplement: can-21-3908_table_s7_supps7.xlsx [file can-21-3908_table_s7_supps7.xlsx]

## Sheet: Sheet1
Table S7. Genes specifically depleted in single CTCs and CTC clusters compared to the primary tumor of CRISPR-CDX-BR16 mice. The table shows the 2’137 genes that are significantly depleted in CTCs (both single CTCs and CTC clusters) when compared to the primary tumor of CRISPR-CDX-BR16 mice and that are also expressed in CTCs of breast cancer patients and of BR16-CDX mice.
genes	log2FoldChange_s	pvalue_s	padj_s	obs_s	log2FoldChange_cl	pvalue_cl	padj_cl	obs_cl
AK3	-30	0	0	20	-9.01422	4.98551e-33	7.46691e-32	24
AK4	-30	0	0	18	-7.80822	5.43149e-54	1.33029e-52	18
ARMC2	-30	0	0	17	-15.8996	5.71807e-144	3.92442e-142	19
ATP6V0E2	-30	0	0	24	-30	0	0	24
C2orf44	-30	0	0	19	-15.7613	4.4171e-94	1.80898e-92	19
CEACAM3	-30	0	0	19	-9.12328	7.78258e-54	1.89868e-52	20
COL1A2	-30	0	0	22	-17.0029	2.36609e-154	1.75922e-152	27
CPLX4	-30	0	0	17	-30	0	0	19
CUX1	-30	0	0	22	-7.90107	1.29298e-47	2.77979e-46	22
EIF4EBP3	-30	0	0	9	-3.92327	4.56927e-06	1.41099e-05	10
FAHD2A	-30	0	0	15	-29.9407	0	0	15
GNA13	-30	0	0	16	-29.992	0	0	20
IQCB1	-30	0	0	15	-29.8951	0	0	15
KL	-30	0	0	22	-30	0	0	24
LAMTOR5	-30	0	0	25	-16.0465	6.81194e-152	4.89011e-150	29
LEAP2	-30	0	0	22	-3.00559	2.57341e-05	7.27251e-05	23
MTMR7	-30	0	0	16	-30	0	0	17
NAA25	-30	0	0	21	-16.6065	1.53016e-142	1.02759e-140	23
NPRL3	-30	0	0	15	-13.1564	2.37232e-52	5.55959e-51	17
RAET1G	-30	0	0	20	-15.903	2.87005e-139	1.84793e-137	21
RANBP17	-30	0	0	17	-11.7317	8.09414e-53	1.91485e-51	20
RAPGEFL1	-30	0	0	20	-13.0293	1.11503e-52	2.63286e-51	22
RUNDC1	-30	0	0	28	-3.58215	9.0101e-10	3.93652e-09	31
S100A16	-30	0	0	31	-12.6947	8.2401e-104	3.95874e-102	34
SEC11C	-30	0	0	16	-15.5721	1.73804e-140	1.13072e-138	19
SEC14L6	-30	0	0	17	-4.87515	2.87969e-09	1.20463e-08	17
SLC5A4	-30	0	0	22	-29.9611	0	0	23
SPNS1	-30	0	0	12	-29.586	6.47553e-259	1.15551e-256	12
TBC1D17	-30	0	0	15	-29.9536	0	0	15
TSPAN4	-30	0	0	16	-29.9924	0	0	16
UBN2	-30	0	0	27	-14.0421	1.55426e-63	4.47334e-62	28
RTDR1	-30	2.05677e-294	2.332e-292	13	-14.5233	1.14985e-62	3.24949e-61	14
UQCRH	-30	1.69924e-289	1.82416e-287	17	-4.43788	1.24104e-09	5.35841e-09	19
EXOC2	-30	1.88748e-284	1.94352e-282	18	-14.1856	1.33229e-62	3.75657e-61	19
ARRDC1	-30	3.14044e-281	3.16902e-279	19	-9.60269	6.54333e-28	8.08435e-27	21
LCE3D	-30	5.74788e-275	5.47187e-273	13	-11.6462	2.40685e-36	4.05175e-35	14
SNX18	-30	2.50437e-248	2.17859e-246	17	-7.23862	1.76438e-25	1.9625e-24	17
TCF3	-30	1.25299e-244	1.04496e-242	16	-29.7167	2.55137e-235	3.74932e-233	16
DEPDC4	-30	1.73794e-240	1.40301e-238	17	-7.9719	3.52768e-30	4.6827e-29	18
EPGN	-30	3.01424e-237	2.33975e-235	19	-29.9818	8.15731e-169	6.83845e-167	19
SCLY	-30	7.86965e-233	5.79654e-231	17	-15.8574	1.65349e-69	5.11232e-68	18
MID2	-30	1.06544e-223	7.41476e-222	19	-29.9894	1.08532e-295	2.22241e-293	21
RAB3A	-30	1.35687e-223	9.37818e-222	14	-8.54116	1.21246e-24	1.21646e-23	18
POLL	-30	1.11215e-220	7.53204e-219	18	-11.1665	5.77844e-36	9.57274e-35	20
ZBTB21	-30	1.75259e-216	1.17121e-214	17	-29.9741	0	0	21
TMEM177	-30	3.1104e-214	2.02497e-212	13	-29.7604	1.56977e-273	3.01662e-271	14
ZNFX1	-30	2.93575e-205	1.84004e-203	15	-29.8677	3.06147e-169	2.58384e-167	16
PAEP	-30	2.27649e-198	1.3513e-196	11	-29.7444	7.63346e-192	7.752e-190	12
TXNRD3	-30	1.38377e-197	8.11841e-196	12	-29.8299	5.38838e-250	9.09544e-248	12
FAM107B	-30	6.76398e-192	3.65002e-190	10	-12.7128	7.9231e-27	9.26662e-26	11
CLIP4	-30	1.93184e-165	8.40265e-164	16	-16.8031	2.94042e-61	8.19839e-60	16
FGB	-30	3.87563e-162	1.64323e-160	12	-3.70483	0.000299129	0.000741502	13
CMPK2	-30	1.77887e-150	6.82533e-149	10	-6.12078	2.88743e-12	1.47332e-11	11
RBM34	-30	5.21418e-150	1.98552e-148	12	-29.8687	2.39721e-102	1.12148e-100	12
NRIP1	-30	6.247e-150	2.36987e-148	12	-29.9941	4.95381e-143	3.34476e-141	13
POF1B	-30	2.32327e-142	8.02879e-141	10	-8.99472	2.4342e-19	1.82288e-18	13
CCDC113	-30	6.22342e-126	1.86352e-124	19	-8.26768	3.82333e-24	3.54282e-23	21
LMF1	-30	8.5542e-124	2.50931e-122	12	-29.8277	1.57731e-136	9.90062e-135	12
GAB1	-30	8.9274e-121	2.56656e-119	11	-29.8857	3.11795e-113	1.65027e-111	11
HMGN1	-30	1.62858e-119	4.61628e-118	14	-11.1857	3.68073e-20	2.85742e-19	15
PCLO	-30	1.04044e-116	2.92455e-115	10	-4.70106	1.41994e-07	5.11581e-07	12
CMC4	-30	1.79477e-116	5.01691e-115	6	-29.3065	3.05073e-146	2.15292e-144	6
PDIA3	-30	1.61833e-108	4.29752e-107	4	-12.2647	1.25503e-29	1.63468e-28	6
PAQR3	-30	2.41816e-108	6.38786e-107	11	-13.7081	1.86449e-23	1.65172e-22	13
DLX2	-30	2.70421e-107	6.99697e-106	9	-29.698	4.12772e-161	3.20245e-159	9
EFCAB2	-30	5.15556e-103	1.27512e-101	8	-29.6666	2.96299e-68	8.93979e-67	8
C5orf28	-30	3.96618e-93	8.93364e-92	10	-12.3093	1.30914e-16	8.52576e-16	11
TTC18	-30	5.3565e-93	1.20117e-91	12	-29.6161	2.27403e-84	8.42875e-83	12
LRRIQ4	-30	1.40073e-91	3.08619e-90	4	-11.9113	4.76836e-20	3.6926e-19	6
RBM25	-30	1.09092e-76	2.09686e-75	11	-29.5877	9.07291e-58	2.36104e-56	11
GRIK2	-30	5.67295e-76	1.0842e-74	16	-16.9855	1.87134e-54	4.62871e-53	17
MCFD2	-30	2.36926e-56	3.76507e-55	18	-29.9764	8.11511e-120	4.52526e-118	19
BZW1	-30	6.39215e-56	1.00472e-54	11	-11.4276	1.45829e-18	1.04627e-17	12
HELZ2	-30	5.81207e-40	7.80953e-39	8	-29.7995	1.24116e-84	4.6141e-83	12
ARHGEF7	-30	7.16274e-40	9.61159e-39	11	-29.892	1.45761e-94	6.04883e-93	13
PLEK2	-30	1.22757e-39	1.64071e-38	5	-6.68323	1.86577e-09	7.92428e-09	10
FAM122B	-30	1.37327e-39	1.8306e-38	10	-29.1062	1.32593e-23	1.18217e-22	10
CDC5L	-30	1.94273e-39	2.57949e-38	10	-29.8676	8.40677e-31	1.14764e-29	10
CYP11A1	-30	8.63889e-31	9.83916e-30	4	-14.5046	5.59163e-12	2.8084e-11	5
RAB6C	-30	1.37445e-26	1.43726e-25	12	-29.9146	9.03842e-64	2.62556e-62	13
PTCRA	-30	1.38839e-26	1.45033e-25	12	-29.834	1.07022e-61	2.99733e-60	16
TFEB	-30	1.59733e-26	1.66515e-25	6	-29.9122	2.06825e-63	5.92535e-62	6
HEPHL1	-30	1.63783e-26	1.70561e-25	10	-30	1.229e-69	3.82828e-68	14
TRIM23	-30	1.83375e-26	1.89983e-25	11	-29.4941	3.40533e-24	3.16253e-23	11
C6orf223	-30	3.13084e-26	3.2107e-25	8	-6.21472	4.58673e-09	1.88463e-08	10
ZKSCAN1	-30	5.97151e-25	5.86172e-24	15	-15.7412	6.40313e-21	5.12702e-20	17
RPL14	-30	6.05757e-25	5.92315e-24	11	-16.4234	1.59283e-08	6.27835e-08	13
SPP2	-30	6.12056e-25	5.9674e-24	9	-29.8	1.15484e-24	1.16802e-23	9
CPAMD8	-30	6.1457e-25	5.97084e-24	7	-29.8977	7.52763e-41	1.4034e-39	6
NUDT16	-30	6.14776e-25	5.97084e-24	14	-29.3705	5.29109e-24	4.83475e-23	15
HIST1H3J	-30	6.15625e-25	5.97334e-24	9	-29.679	1.78277e-24	1.71297e-23	10
SMNDC1	-30	6.16549e-25	5.97656e-24	3	-29.802	1.17562e-24	1.18425e-23	3
CCM2	-30	6.20334e-25	6.00172e-24	8	-29.7072	1.60226e-24	1.55508e-23	8
MPHOSPH10	-30	6.21157e-25	6.00393e-24	3	-29.8502	8.35295e-48	1.80826e-46	3
ECE2	-30	6.24817e-25	6.01826e-24	5	-29.7613	7.55414e-31	1.03805e-29	6
FMO5	-30	6.26624e-25	6.01826e-24	12	-27.7171	1.51482e-21	1.2473e-20	12
OXGR1	-30	6.26345e-25	6.01826e-24	4	-14.5534	1.48233e-09	6.35192e-09	6
PTP4A1	-30	6.26652e-25	6.01826e-24	5	-15.6679	1.82094e-11	8.84347e-11	6
SLC22A9	-30	6.23546e-25	6.01826e-24	9	-12.7317	1.18749e-05	3.486e-05	10
TTC23L	-30	6.26815e-25	6.01826e-24	9	-29.8991	8.25448e-25	8.78251e-24	9
RAP1GDS1	-30	6.28462e-25	6.02833e-24	11	-13.8727	1.81345e-06	5.84863e-06	12
EIF2D	-30	6.32182e-25	6.04677e-24	8	-24.8609	1.23675e-17	8.49273e-17	8
SGK3	-30	6.31378e-25	6.04677e-24	3	-29.823	1.0616e-28	1.34351e-27	3
RBM27	-30	6.35059e-25	6.0628e-24	8	-29.9563	6.73615e-25	7.25982e-24	9
MMP25	-30	6.37707e-25	6.08232e-24	8	-29.8978	8.58251e-25	9.0774e-24	9
SEC61G	-30	6.59093e-25	6.26262e-24	9	-29.896	8.68372e-25	9.16892e-24	9
NDUFA6	-29.9999	8.10479e-78	1.56978e-76	13	-29.5219	2.72211e-47	5.79248e-46	13
GANC	-29.9999	0	0	17	-4.62256	9.93803e-11	4.60787e-10	18
ENO3	-29.9998	8.06429e-292	8.94251e-290	19	-10.049	2.75489e-40	5.08292e-39	22
SAMD1	-29.9997	1.67295e-200	1.01088e-198	12	-29.9686	8.78757e-169	7.31771e-167	12
DDX21	-29.9988	3.25407e-221	2.21871e-219	6	-29.9513	4.76557e-214	5.89374e-212	7
VPS33A	-29.998	2.83844e-187	1.45394e-185	15	-29.8855	1.0966e-153	8.10508e-152	15
TPK1	-29.996	3.31337e-106	8.48609e-105	8	-8.37726	2.41144e-18	1.71436e-17	11
CAMK2D	-29.9959	0	0	20	-14.2069	2.42273e-76	8.15697e-75	21
PURA	-29.9954	0	0	14	-29.8865	0	0	15
AIFM3	-29.9953	0	0	9	-8.22291	2.50227e-33	3.79779e-32	10
MSANTD2	-29.9945	5.60222e-175	2.6294e-173	11	-27.6313	1.94301e-107	9.70806e-106	12
DPP3	-29.9936	0	0	18	-29.9939	0	0	19
MCM8	-29.9925	0	0	6	-11.5308	5.04595e-58	1.32693e-56	9
TGFBI	-29.9925	3.681e-190	1.93463e-188	16	-8.72677	2.09041e-20	1.63605e-19	17
TNFRSF11A	-29.9913	0	0	15	-29.9839	0	0	15
PLA2G6	-29.9911	6.51295e-68	1.16323e-66	14	-29.9414	2.13162e-87	8.19263e-86	18
EML4	-29.9909	7.47847e-148	2.77446e-146	11	-7.43818	4.06907e-17	2.72822e-16	12
LONP2	-29.9909	0	0	15	-29.9449	0	0	16
ZNF117	-29.9909	1.06402e-209	6.75283e-208	18	-9.05627	7.66402e-22	6.43355e-21	17
BTN3A1	-29.9904	0	0	7	-3.2925	3.85578e-06	1.19972e-05	10
SERINC5	-29.9897	1.43173e-151	5.57822e-150	5	-29.9507	1.91486e-106	9.41676e-105	5
STARD3	-29.9892	1.20484e-107	3.12546e-106	16	-29.9691	3.96373e-121	2.2505e-119	20
ADAM22	-29.9882	2.74118e-146	9.80897e-145	15	-4.03743	1.09479e-08	4.38022e-08	16
KIAA1432	-29.9879	2.62336e-56	4.15578e-55	18	-30	8.19608e-121	4.61159e-119	19
WRN	-29.9879	6.6595e-25	6.31589e-24	11	-17.3713	2.31491e-09	9.75559e-09	11
NCK1	-29.9845	2.36249e-194	1.31712e-192	7	-7.64507	2.05672e-16	1.31949e-15	8
ARL5A	-29.9842	0	0	18	-7.66326	1.94299e-18	1.38606e-17	19
CMTM6	-29.9836	2.26993e-191	1.2184e-189	4	-8.0856	5.53822e-18	3.85392e-17	5
FOXP3	-29.9831	8.24098e-147	2.98064e-145	14	-15.7533	1.70442e-58	4.54914e-57	14
HNF1A	-29.9828	7.27632e-191	3.86449e-189	8	-29.9768	3.52868e-158	2.7041e-156	9
IKBKG	-29.9825	6.62448e-175	3.0948e-173	8	-29.8614	2.46796e-145	1.7222e-143	9
FAM86C1	-29.9807	1.65225e-141	5.63273e-140	11	-13.2064	5.75104e-24	5.23969e-23	11
BMF	-29.9796	6.54226e-188	3.38554e-186	10	-5.9293	6.79768e-12	3.39775e-11	13
TNNC2	-29.9794	6.88206e-25	6.49643e-24	10	-29.9977	5.93792e-25	6.43841e-24	10
MUTYH	-29.9792	4.59683e-282	4.68551e-280	16	-14.8919	1.03045e-69	3.21783e-68	17
TSSK1B	-29.9787	4.72805e-171	2.12048e-169	17	-29.9612	2.39876e-225	3.29262e-223	21
PDF	-29.9786	2.89239e-127	8.7649e-126	12	-29.555	1.74638e-69	5.38619e-68	12
ANO8	-29.9777	1.20787e-142	4.20298e-141	13	-29.9252	2.13157e-115	1.14765e-113	13
MARCH3	-29.9771	1.60894e-146	5.7985e-145	5	-4.96389	7.77313e-08	2.86413e-07	10
UGT2A3	-29.9742	3.18393e-287	3.382e-285	13	-11.946	3.75307e-44	7.47681e-43	15
WDR78	-29.9737	2.25e-101	5.43176e-100	14	-12.3571	2.43557e-29	3.14285e-28	19
ABHD2	-29.9732	0	0	14	-8.41491	2.77999e-27	3.32613e-26	18
UCP3	-29.9732	1.37034e-255	1.22372e-253	14	-30	0	0	17
FCGR1A	-29.9725	3.7039e-271	3.46075e-269	19	-4.35326	2.90983e-08	1.11767e-07	20
LRRC7	-29.9708	8.34851e-207	5.2653e-205	9	-29.4061	2.62924e-124	1.52046e-122	9
SNRNP40	-29.9701	7.06756e-25	6.65908e-24	11	-16.1075	3.00735e-08	1.153e-07	13
YWHAH	-29.9699	4.00581e-93	9.00282e-92	15	-29.923	2.32334e-103	1.11191e-101	15
MAP3K1	-29.9666	0	0	12	-30	0	0	16
F8A1	-29.9659	2.50561e-242	2.05562e-240	15	-29.8656	2.50118e-201	2.81462e-199	15
MYO1D	-29.9653	2.27199e-188	1.18791e-186	16	-29.8795	2.5031e-242	3.86002e-240	17
PIM2	-29.9648	1.84438e-26	1.90888e-25	10	-4.33101	3.98772e-05	0.000110183	23
EVA1C	-29.9644	9.17319e-97	2.11823e-95	7	-29.8049	1.00632e-106	4.98807e-105	7
BDNF	-29.9643	0	0	20	-4.83674	1.09756e-11	5.41884e-11	22
SEC23A	-29.964	7.51497e-105	1.90059e-103	12	-29.9021	7.84239e-117	4.29646e-115	13
BCAT2	-29.9629	1.08353e-131	3.42757e-130	12	-30	5.0898e-172	4.44592e-170	13
RNF19B	-29.9624	1.04352e-187	5.37254e-186	12	-30	3.90714e-243	6.10051e-241	13
CDC34	-29.9614	3.12419e-123	9.11161e-122	12	-16.925	3.18151e-21	2.58053e-20	12
TRAF3IP3	-29.9609	2.42739e-121	7.01857e-120	17	-9.67937	1.09197e-22	9.43277e-22	20
BTBD10	-29.9598	5.08876e-235	3.80375e-233	14	-5.77325	2.19451e-13	1.20385e-12	14
ARL2BP	-29.9589	0	0	18	-29.967	0	0	19
FAM25A	-29.9569	7.61892e-234	5.65312e-232	8	-3.84037	4.19987e-06	1.30143e-05	11
GLIPR1	-29.9554	0	0	15	-29.9002	1.03844e-216	1.32359e-214	15
SYNCRIP	-29.9546	4.91622e-217	3.3073e-215	17	-3.41712	1.11909e-06	3.70389e-06	17
STMN2	-29.9539	5.12324e-202	3.13325e-200	16	-29.8531	8.81302e-168	7.10215e-166	16
DHX16	-29.9539	7.86159e-25	7.35912e-24	8	-12.8608	9.71816e-06	2.88473e-05	10
NADK	-29.9535	3.76186e-240	3.01277e-238	15	-29.8249	6.92354e-268	1.27179e-265	16
NEDD4L	-29.9512	3.10872e-212	2.0109e-210	11	-29.8812	1.05551e-237	1.58848e-235	12
FAM83G	-29.9508	2.01716e-185	1.02287e-183	18	-4.39852	4.10985e-06	1.27511e-05	19
ANKS1B	-29.9503	4.58335e-105	1.165e-103	14	-30	8.85716e-139	5.67358e-137	15
MAGEE1	-29.9502	4.79631e-204	2.9693e-202	12	-7.80048	3.61704e-15	2.16797e-14	14
PXMP4	-29.95	8.74904e-148	3.23394e-146	17	-29.882	3.36063e-140	2.17501e-138	17
LEKR1	-29.9499	2.64448e-126	7.94209e-125	15	-16.305	2.99419e-44	6.00327e-43	15
SBSPON	-29.9492	6.37353e-88	1.35116e-86	15	-29.9521	2.44678e-116	1.32881e-114	16
ARSA	-29.9486	2.43784e-306	2.9286e-304	10	-5.64025	6.79957e-13	3.58672e-12	11
GNB3	-29.9483	7.32969e-25	6.89318e-24	10	-25.5815	1.33451e-18	9.59665e-18	12
YBX1	-29.9477	2.46619e-158	1.00754e-156	14	-29.8499	1.87276e-129	1.13008e-127	14
LPHN2	-29.9466	7.50458e-25	7.05109e-24	9	-25.2389	3.85734e-18	2.70533e-17	9
ENC1	-29.9455	3.28174e-69	5.93477e-68	7	-11.7042	2.05179e-14	1.18543e-13	8
KRTAP5-2	-29.9455	2.59511e-201	1.57755e-199	5	-13.1214	5.3038e-41	9.91764e-40	7
BBC3	-29.9453	1.64411e-103	4.10661e-102	11	-15.0582	1.31092e-35	2.14048e-34	13
GLOD5	-29.9451	6.73666e-61	1.12736e-59	6	-15.3239	1.16218e-12	6.04867e-12	6
ADAP1	-29.945	3.60491e-114	9.91203e-113	19	-16.6522	1.29251e-43	2.54648e-42	18
ANKRD37	-29.9443	6.5838e-140	2.22198e-138	4	-7.30096	4.97937e-15	2.97027e-14	5
GREB1L	-29.9439	0	0	13	-14.4386	8.02051e-54	1.95291e-52	14
RASSF8	-29.9438	8.32141e-224	5.83134e-222	14	-13.5825	1.67607e-38	2.97806e-37	16
SLC24A4	-29.9436	8.5469e-112	2.32471e-110	11	-29.8857	2.03467e-125	1.18762e-123	13
TIMM8B	-29.9436	1.669e-26	1.73627e-25	11	-29.8859	1.24779e-73	4.13426e-72	12
MSX2	-29.9426	1.09858e-222	7.54131e-221	15	-14.6845	3.36346e-56	8.5916e-55	18
ADRB2	-29.9422	6.50511e-241	5.29379e-239	15	-29.8813	2.12865e-273	4.02863e-271	16
RAB3IP	-29.9419	0	0	14	-29.8957	0	0	15
C19orf71	-29.9417	2.24329e-140	7.59633e-139	7	-8.42465	1.42382e-21	1.17859e-20	12
FAM83B	-29.9414	3.59382e-128	1.09233e-126	9	-11.7127	6.49265e-32	9.27915e-31	9
LDLR	-29.9414	7.4289e-277	7.13953e-275	17	-7.95697	1.08764e-19	8.28901e-19	18
PGM2	-29.9405	9.63929e-161	4.01943e-159	12	-29.8436	1.17451e-153	8.62988e-152	12
HS6ST2	-29.9386	5.39442e-139	1.80249e-137	13	-12.0841	2.16707e-24	2.06633e-23	13
PLXNA2	-29.9377	0	0	11	-29.8854	2.74344e-305	5.90833e-303	11
C10orf111	-29.9367	7.70173e-25	7.2296e-24	9	-30	5.61502e-25	6.11483e-24	10
CBFB	-29.9363	4.64467e-148	1.7295e-146	15	-29.3831	9.20304e-116	4.97641e-114	16
PCSK4	-29.9357	3.96059e-293	4.4407e-291	12	-10.7724	3.41836e-37	5.93038e-36	15
PSMB10	-29.9356	5.65249e-194	3.13403e-192	14	-29.8577	8.66165e-186	8.13479e-184	14
NCOA2	-29.9345	1.00523e-291	1.10258e-289	13	-8.48016	1.03395e-23	9.27142e-23	16
ARRDC3	-29.9344	5.42768e-102	1.32617e-100	10	-15.9714	2.03508e-34	3.20962e-33	13
UBAC1	-29.9335	3.53387e-26	3.59841e-25	8	-29.747	1.53694e-52	3.61544e-51	9
GNE	-29.9296	6.19889e-69	1.11503e-67	5	-7.97518	4.3139e-08	1.63436e-07	6
TCEB3	-29.9287	2.36939e-136	7.71274e-135	11	-29.9265	2.60837e-153	1.90533e-151	12
IQCC	-29.9276	2.86948e-26	2.95167e-25	11	-14.8339	4.35524e-17	2.91696e-16	13
BAZ2B	-29.9266	2.00744e-103	5.00176e-102	13	-29.862	6.83982e-81	2.42717e-79	14
LECT2	-29.9263	8.49738e-100	2.01758e-98	10	-15.9619	7.60632e-37	1.30509e-35	12
LIPM	-29.926	2.23984e-156	9.11382e-155	8	-23.63	6.9527e-110	3.57392e-108	8
KLHDC8B	-29.9259	8.17396e-25	7.62323e-24	8	-19.1954	3.97991e-11	1.88664e-10	10
LOC100129520	-29.9256	3.60582e-98	8.44231e-97	10	-29.3901	2.25078e-123	1.2956e-121	10
RNLS	-29.9255	1.00799e-138	3.35696e-137	11	-6.18122	1.8569e-11	9.00409e-11	15
HIVEP3	-29.9253	4.79116e-236	3.6627e-234	7	-4.24401	1.67761e-09	7.16166e-09	8
CCDC104	-29.9248	8.73178e-83	1.77288e-81	13	-29.715	2.62143e-91	1.04949e-89	14
CCDC42B	-29.9246	8.47884e-125	2.52389e-123	10	-29.6628	2.25608e-100	1.02475e-98	11
ARFGEF2	-29.923	1.46583e-214	9.66774e-213	13	-11.5447	8.43181e-39	1.51324e-37	14
MAP3K10	-29.9224	2.21885e-182	1.08692e-180	13	-9.60983	2.19987e-19	1.65235e-18	16
CAMKMT	-29.921	6.48668e-129	2.02028e-127	11	-30	1.28467e-168	1.05571e-166	12
ZNF416	-29.9209	2.90163e-87	6.12559e-86	13	-10.492	2.93071e-14	1.68156e-13	14
IL18	-29.9209	3.9591e-39	5.20877e-38	3	-10.8418	7.27255e-12	3.62062e-11	4
MTERFD3	-29.9192	0	0	20	-5.55455	5.08074e-16	3.20038e-15	23
FAM98C	-29.9192	9.38094e-212	6.02949e-210	10	-29.6938	3.02002e-202	3.55878e-200	10
MAP7	-29.919	5.80375e-132	1.8475e-130	5	-29.8687	4.22379e-170	3.63857e-168	6
FBXL22	-29.9178	6.39495e-243	5.28947e-241	16	-29.8625	3.00437e-269	5.60114e-267	15
CCNJ	-29.9172	2.16348e-123	6.32803e-122	9	-29.809	1.04479e-84	3.89568e-83	9
HMG20A	-29.9164	0	0	9	-10.0529	1.7692e-54	4.39346e-53	9
PTPRZ1	-29.9164	2.90804e-164	1.24872e-162	10	-7.63685	1.04339e-15	6.4712e-15	11
PRPSAP1	-29.9161	8.51452e-25	7.89706e-24	4	-24.0752	1.2136e-16	7.9118e-16	6
SEMA4G	-29.916	1.24744e-98	2.92742e-97	15	-29.665	4.84063e-91	1.93177e-89	15
KCNMB3	-29.916	8.50473e-25	7.89524e-24	7	-16.2501	2.26913e-08	8.8024e-08	7
KIF2A	-29.9156	3.05702e-161	1.28535e-159	14	-10.04	2.82796e-26	3.24073e-25	14
RBM28	-29.9155	2.91187e-71	5.33279e-70	4	-29.788	2.29416e-67	6.85559e-66	4
EIF4E2	-29.9155	4.5221e-188	2.35219e-186	7	-9.9051	2.14566e-23	1.89276e-22	8
PPP1R37	-29.9149	1.30964e-150	5.04412e-149	16	-29.8978	1.39247e-168	1.13682e-166	17
RRM1	-29.9148	1.8238e-26	1.89147e-25	16	-17.7747	7.22404e-31	9.93783e-30	16
B3GAT1	-29.9145	2.18305e-128	6.69579e-127	6	-9.50833	2.34017e-21	1.90803e-20	8
HIST2H3D	-29.9138	3.15927e-74	5.95892e-73	5	-11.68	4.98466e-13	2.66539e-12	6
ZNF766	-29.9136	8.33424e-25	7.75123e-24	5	-29.8684	9.06708e-25	9.54949e-24	5
DAW1	-29.9134	0	0	12	-4.77468	9.37178e-10	4.08882e-09	16
SAMD12	-29.9133	8.37385e-25	7.7809e-24	10	-29.9964	5.70004e-25	6.20202e-24	11
NFU1	-29.9126	2.25569e-245	1.92899e-243	6	-29.8178	3.5116e-205	4.21763e-203	6
C3orf83	-29.9123	8.14197e-25	7.60042e-24	15	-11.1205	2.30797e-16	1.47992e-15	16
PNPLA8	-29.9123	7.18581e-81	1.4274e-79	3	-12.3695	1.2238e-19	9.30403e-19	5
ENSA	-29.9117	7.20453e-179	3.46195e-177	6	-29.6505	5.75895e-198	6.31009e-196	7
LILRA5	-29.9106	8.75235e-86	1.82857e-84	17	-29.7878	4.9982e-94	2.03363e-92	16
ZNF76	-29.9092	4.53037e-67	7.97835e-66	5	-8.36298	2.0432e-12	1.04984e-11	7
PLOD2	-29.9092	7.66188e-102	1.8541e-100	4	-29.8864	2.29e-115	1.22766e-113	4
DUSP4	-29.9087	8.80228e-25	8.11918e-24	3	-6.29103	2.89923e-05	8.14354e-05	4
HEBP2	-29.9081	1.8701e-172	8.53898e-171	8	-29.5497	5.04056e-141	3.31377e-139	8
TXNDC11	-29.9074	4.76672e-266	4.41293e-264	17	-14.3743	2.79474e-62	7.8624e-61	20
BBIP1	-29.9066	6.5721e-129	2.04059e-127	3	-15.8771	2.10651e-43	4.13068e-42	4
HIST1H2AC	-29.9064	4.9056e-155	1.97221e-153	13	-29.7647	5.28775e-148	3.77424e-146	13
KCNAB2	-29.9063	3.33204e-110	9.01438e-109	4	-29.8464	2.34321e-145	1.64433e-143	5
LIG4	-29.9043	1.77294e-145	6.27744e-144	5	-10.3208	1.67444e-22	1.4365e-21	7
ATF3	-29.9042	2.61671e-191	1.3971e-189	11	-29.8852	2.32406e-216	2.9323e-214	15
RBM22	-29.9041	9.59353e-25	8.64097e-24	6	-29.7647	1.44151e-24	1.41112e-23	6
ANKIB1	-29.9013	7.9697e-145	2.81197e-143	12	-11.3288	5.10623e-25	5.57534e-24	14
IER5L	-29.9012	6.8822e-228	4.92541e-226	13	-29.9428	1.10961e-259	2.00872e-257	17
AP5M1	-29.9011	3.07144e-93	6.93376e-92	5	-14.3242	1.80274e-27	2.17775e-26	5
SERP1	-29.901	8.61802e-25	7.96378e-24	10	-11.9168	1.04771e-12	5.46197e-12	12
ADCY5	-29.901	1.07277e-262	9.84123e-261	18	-29.4387	3.08492e-288	6.21511e-286	18
TCEAL3	-29.9009	9.14194e-25	8.37887e-24	7	-15.2159	1.67111e-07	5.96907e-07	8
FKTN	-29.9004	2.83656e-96	6.5202e-95	7	-29.7327	1.46611e-106	7.23841e-105	7
SF3B1	-29.8994	9.01709e-25	8.28702e-24	4	-29.6138	2.28875e-24	2.17405e-23	4
AIM1	-29.899	2.1208e-90	4.62225e-89	5	-29.9313	4.44548e-102	2.06426e-100	6
ECI1	-29.8985	1.10071e-192	5.97163e-191	14	-29.783	1.29282e-186	1.23272e-184	16
ACSM4	-29.8983	9.05346e-25	8.31287e-24	4	-25.0805	6.24184e-18	4.33872e-17	5
ETS2	-29.898	8.72164e-25	8.05216e-24	5	-29.7477	1.38244e-24	1.36615e-23	5
C6orf25	-29.8968	9.23135e-25	8.43782e-24	4	-29.9014	8.20368e-25	8.74336e-24	4
TDRKH	-29.8967	0	0	9	-7.67779	3.89693e-18	2.73157e-17	10
KLHL24	-29.8959	5.68338e-171	2.53765e-169	7	-9.89305	1.79247e-32	2.61257e-31	8
UGT8	-29.8958	2.81456e-148	1.05192e-146	20	-9.06354	2.05272e-27	2.46781e-26	21
C15orf52	-29.8953	4.36288e-108	1.14353e-106	11	-28.7811	2.52989e-132	1.54906e-130	13
PLA2G4C	-29.895	6.18726e-109	1.65612e-107	9	-6.02603	2.93773e-11	1.40595e-10	11
MYLK	-29.8948	3.34083e-237	2.57346e-235	15	-9.65072	3.16131e-24	2.94466e-23	18
GNB2	-29.8934	5.10091e-151	1.97216e-149	9	-10.8741	1.05797e-27	1.29307e-26	10
KCTD16	-29.8934	1.16773e-100	2.78571e-99	12	-29.8144	3.17121e-94	1.30301e-92	12
PSORS1C1	-29.8931	3.97178e-173	1.8301e-171	12	-29.972	8.35048e-195	8.7652e-193	11
SLC39A4	-29.8931	8.85484e-25	8.15276e-24	8	-26.2885	1.4932e-19	1.12971e-18	9
FLCN	-29.8925	1.96344e-26	2.02795e-25	15	-15.3548	6.27683e-24	5.7021e-23	17
KLHDC1	-29.8917	1.28538e-184	6.45314e-183	9	-4.02518	4.89985e-06	1.5086e-05	12
CEP85	-29.891	9.73036e-25	8.71243e-24	5	-29.2531	8.54737e-24	7.69756e-23	6
AFP	-29.8903	6.9349e-133	2.22159e-131	8	-11.059	6.34832e-23	5.52976e-22	10
SYCP3	-29.8901	6.10735e-102	1.48863e-100	13	-29.807	1.43333e-79	5.01506e-78	13
SPECC1	-29.89	9.43749e-25	8.54881e-24	7	-29.8937	8.64163e-25	9.1322e-24	7
NSUN7	-29.8898	9.37442e-25	8.5146e-24	9	-30	5.73269e-25	6.23212e-24	10
BAG6	-29.889	9.37011e-25	8.5146e-24	12	-13.8432	1.91114e-06	6.15258e-06	13
TNFAIP3	-29.889	9.15985e-25	8.38766e-24	3	-7.9196	3.22844e-08	1.23247e-07	4
MEGF9	-29.8882	2.78816e-151	1.08213e-149	12	-29.8801	5.1869e-168	4.20711e-166	13
NR1D1	-29.8867	1.39967e-83	2.85912e-82	6	-5.04094	1.19262e-06	3.92855e-06	9
ZNF34	-29.8864	7.60786e-47	1.10303e-45	4	-10.8762	1.49808e-10	6.86951e-10	6
ZNF331	-29.8859	9.66315e-25	8.68021e-24	3	-29.6473	2.07748e-24	1.98393e-23	4
ASPHD1	-29.8856	2.89467e-169	1.28679e-167	17	-29.9315	7.38114e-190	7.25967e-188	18
TRIM44	-29.8847	9.50785e-25	8.58173e-24	6	-29.7371	1.47836e-24	1.4438e-23	8
EID1	-29.8847	3.83432e-195	2.17372e-193	8	-11.982	1.10094e-34	1.74738e-33	10
CYP21A2	-29.884	2.04643e-167	9.01768e-166	14	-29.9321	9.15594e-137	5.7761e-135	14
HECTD1	-29.8832	1.8807e-64	3.24413e-63	8	-13.4804	1.36759e-14	7.98248e-14	9
C9orf171	-29.883	9.47204e-25	8.5724e-24	5	-16.2299	2.73655e-09	1.14667e-08	6
FBXO42	-29.8828	9.70445e-25	8.69734e-24	5	-29.8719	9.36293e-25	9.79993e-24	5
ZHX2	-29.8826	2.02942e-104	5.10696e-103	18	-12.9996	1.43703e-32	2.11175e-31	18
DUSP10	-29.8822	1.2974e-92	2.88371e-91	12	-29.6234	4.31723e-85	1.6292e-83	13
CSNK2A1	-29.8819	1.96236e-146	7.04702e-145	9	-29.7386	1.7447e-141	1.15921e-139	9
NRIP2	-29.8819	9.72205e-236	7.37633e-234	12	-12.6507	1.49287e-51	3.45965e-50	15
TET1	-29.8817	1.96829e-142	6.82544e-141	6	-29.7576	6.62802e-118	3.6633e-116	5
PRRT4	-29.8813	4.87033e-146	1.73663e-144	4	-29.7569	2.84244e-141	1.87857e-139	5
SCAP	-29.8813	9.30721e-25	8.48411e-24	4	-29.8022	1.16345e-24	1.17388e-23	4
STK38	-29.8811	1.30781e-106	3.3666e-105	9	-29.5832	6.25773e-58	1.63869e-56	9
MAP1LC3A	-29.8799	3.63514e-46	5.21054e-45	4	-9.12999	5.78308e-10	2.56613e-09	6
DAB2	-29.8785	1.79574e-252	1.58954e-250	5	-29.7647	7.14895e-249	1.17497e-246	5
PHF10	-29.8784	2.39369e-103	5.94944e-102	15	-6.81392	1.50543e-13	8.33893e-13	23
RASL10A	-29.8783	9.40949e-25	8.53111e-24	4	-29.7611	8.23863e-36	1.35228e-34	3
DCTN6	-29.878	9.66857e-25	8.68021e-24	4	-15.9131	4.38874e-08	1.6602e-07	4
BCMO1	-29.8777	1.0732e-65	1.87041e-64	8	-4.92621	1.01554e-07	3.7037e-07	15
CCDC53	-29.8768	1.03438e-24	9.1561e-24	6	-16.9655	5.43266e-09	2.21908e-08	7
RAB11FIP1	-29.8763	4.1525e-231	3.0146e-229	10	-29.9839	1.22316e-229	1.73619e-227	10
F3	-29.8763	3.23538e-277	3.16973e-275	15	-29.6336	1.40102e-307	3.0702e-305	15
CTNNBIP1	-29.8762	1.01687e-24	9.02481e-24	8	-9.9657	0.000606084	0.00144037	10
DYNLL1	-29.8752	1.01363e-24	9.01075e-24	5	-7.94491	0.00125935	0.00287158	6
CCDC82	-29.8751	1.59813e-84	3.29117e-83	9	-29.8105	5.64525e-78	1.93722e-76	9
SRL	-29.8749	3.92995e-68	7.0314e-67	12	-29.3349	2.52139e-49	5.66451e-48	12
SCAI	-29.8748	3.28194e-132	1.04804e-130	10	-7.86329	1.0757e-16	7.04594e-16	10
UBQLN2	-29.8744	1.33811e-64	2.31213e-63	8	-29.6949	1.76964e-85	6.71872e-84	9
TNNT1	-29.872	1.70452e-109	4.58676e-108	13	-29.8381	5.00223e-86	1.90497e-84	13
RGS5	-29.871	1.00941e-24	8.98235e-24	4	-12.2894	2.36327e-05	6.69987e-05	5
GSKIP	-29.8705	0	0	14	-11.6797	2.07468e-49	4.66934e-48	17
UPB1	-29.8701	3.04416e-97	7.06174e-96	9	-29.9167	4.65686e-128	2.7832e-126	11
N6AMT2	-29.8699	3.39515e-26	3.46416e-25	10	-29.808	9.06393e-50	2.0585e-48	10
COL16A1	-29.8698	4.3536e-77	8.38401e-76	7	-29.8424	2.0164e-48	4.41874e-47	7
PTCHD2	-29.8694	1.03008e-24	9.12598e-24	3	-13.019	7.53869e-06	2.26415e-05	3
SOAT2	-29.8688	6.65422e-102	1.61802e-100	12	-7.81239	1.61076e-11	7.85324e-11	15
SAR1A	-29.8686	4.0616e-138	1.34379e-136	3	-29.7946	9.60709e-98	4.15232e-96	3
ZNF449	-29.8685	1.43631e-46	2.07054e-45	4	-23.1376	7.98193e-17	5.26968e-16	4
TTC36	-29.8674	2.84403e-164	1.22646e-162	17	-3.51269	0.000221415	0.00055929	17
C2	-29.8673	9.76016e-25	8.7125e-24	8	-10.534	3.35439e-10	1.50936e-09	9
TMEM219	-29.8672	7.1483e-105	1.8124e-103	11	-9.017	4.23113e-17	2.83536e-16	14
ZBTB17	-29.8666	9.59918e-25	8.64097e-24	8	-29.9318	1.41916e-51	3.29493e-50	9
GMEB1	-29.8665	3.55924e-26	3.62059e-25	10	-13.0818	2.84397e-14	1.63329e-13	11
NHLH1	-29.865	2.04754e-102	5.02718e-101	14	-5.71752	6.6911e-12	3.34716e-11	16
DGAT2	-29.8646	1.00395e-48	1.48764e-47	3	-12.9458	2.11838e-12	1.08802e-11	5
IL17REL	-29.8636	1.02478e-24	9.08701e-24	8	-7.83198	1.29813e-06	4.25591e-06	9
PLIN5	-29.8636	2.92482e-108	7.70609e-107	7	-12.9808	3.55734e-25	3.9115e-24	8
RING1	-29.8635	1.04131e-83	2.13141e-82	15	-29.5799	2.48291e-24	2.34599e-23	15
NCCRP1	-29.8633	4.31293e-58	7.00834e-57	6	-12.6132	5.0668e-15	3.01954e-14	9
TXNDC16	-29.8626	0	0	11	-29.8804	2.1416e-249	3.56676e-247	10
ATF7IP	-29.8623	1.0074e-24	8.97231e-24	8	-7.44748	7.11115e-08	2.63186e-07	10
TUFT1	-29.8621	2.88971e-197	1.67586e-195	11	-29.7016	5.90947e-221	7.85268e-219	11
AQP11	-29.8607	3.66996e-287	3.85766e-285	14	-8.35373	2.87352e-29	3.6927e-28	14
NXNL2	-29.8586	4.17751e-26	4.21975e-25	6	-12.6516	2.78108e-17	1.87674e-16	6
IDH3G	-29.8567	1.13738e-38	1.47904e-37	4	-29.9076	7.95282e-25	8.51231e-24	4
HDGFRP2	-29.8536	4.03928e-26	4.08831e-25	3	-8.88983	1.6892e-15	1.03481e-14	4
APC2	-29.8533	1.07118e-24	9.46519e-24	8	-9.89516	0.000662246	0.00156402	9
ALS2	-29.853	4.92683e-47	7.15348e-46	4	-10.4607	1.07461e-11	5.3076e-11	5
XKR9	-29.851	2.4353e-216	1.61675e-214	4	-9.87672	1.00777e-31	1.43372e-30	5
PIK3C2B	-29.8506	1.65624e-147	6.0775e-146	14	-8.70965	1.02952e-19	7.86531e-19	16
LIMK1	-29.849	1.73314e-31	2.00104e-30	3	-12.6491	2.63119e-09	1.10475e-08	4
CNOT2	-29.8485	1.09744e-24	9.65494e-24	3	-29.7851	1.27678e-24	1.2728e-23	3
TACR2	-29.8484	1.09354e-24	9.62907e-24	8	-25.1694	4.86536e-18	3.39325e-17	8
PREPL	-29.8481	0	0	17	-12.9653	1.33874e-77	4.56892e-76	19
PTPDC1	-29.8456	3.30853e-26	3.38261e-25	15	-28.9111	2.58763e-23	2.2762e-22	15
CDH6	-29.8449	3.94131e-26	3.99314e-25	8	-30	8.78243e-45	1.78087e-43	9
CA5B	-29.844	1.51379e-47	2.20747e-46	4	-3.44963	0.000127609	0.000332492	7
ENTPD7	-29.8437	1.45464e-152	5.68945e-151	8	-3.63484	0.00053907	0.00128871	8
AACS	-29.8436	1.29105e-92	2.87593e-91	4	-7.0576	1.0441e-13	5.8405e-13	9
FAM207A	-29.8431	1.14088e-24	1.00023e-23	3	-29.6389	2.20978e-24	2.10384e-23	3
TTC39C	-29.8431	1.49609e-84	3.08732e-83	3	-14.4098	3.75797e-16	2.38036e-15	4
GSTK1	-29.8424	1.7171e-143	6.01642e-142	12	-29.9995	7.90879e-189	7.71787e-187	14
PTK6	-29.8413	3.29549e-133	1.05907e-131	14	-29.7216	1.25083e-90	4.94435e-89	14
ADAMTS2	-29.8409	1.62387e-67	2.86979e-66	12	-9.61729	1.82959e-13	1.00683e-12	13
IMMP2L	-29.8408	1.13e-24	9.92414e-24	3	-7.3649	4.41738e-06	1.36713e-05	5
APLP2	-29.8397	1.12728e-24	9.90891e-24	8	-29.8735	9.38991e-25	9.81501e-24	8
GPRIN3	-29.8388	0	0	11	-7.32683	9.26877e-22	7.74941e-21	13
DRG2	-29.8378	1.24361e-124	3.69095e-123	13	-3.70107	0.000606699	0.00144139	13
MMAB	-29.8375	2.70551e-141	9.19234e-140	7	-29.7467	1.64986e-99	7.36013e-98	7
TRAF3	-29.8369	2.50476e-65	4.35034e-64	3	-12.2132	1.35019e-19	1.02275e-18	5
CCNG1	-29.835	3.38022e-26	3.45241e-25	9	-29.8619	7.17908e-50	1.6334e-48	9
HSPB8	-29.834	1.15555e-24	1.0101e-23	8	-29.8697	9.25457e-25	9.71419e-24	8
ACO2	-29.8318	2.32461e-60	3.86452e-59	3	-29.8917	7.64258e-37	1.30951e-35	3
C7orf63	-29.8315	1.18391e-147	4.36016e-146	8	-29.9373	1.41113e-169	1.19907e-167	9
ABCA10	-29.8311	1.31114e-102	3.23488e-101	8	-29.959	5.19082e-97	2.20539e-95	10
TAF4	-29.8308	1.19277e-24	1.03651e-23	3	-29.7741	1.35941e-24	1.34552e-23	3
TP73	-29.8306	2.84533e-99	6.72419e-98	11	-7.66081	8.41123e-17	5.54723e-16	15
CEP89	-29.8297	1.21317e-24	1.04813e-23	4	-29.8442	1.05093e-24	1.08043e-23	4
EGFL8	-29.8286	4.43835e-129	1.38661e-127	7	-29.8648	1.89896e-144	1.31049e-142	7
GAP43	-29.8285	1.14048e-24	1.00023e-23	3	-23.5802	5.01562e-16	3.16095e-15	3
FHDC1	-29.8257	4.10947e-120	1.17809e-118	6	-3.93483	4.48973e-06	1.38849e-05	6
ZNF189	-29.8236	1.181e-108	3.14445e-107	9	-15.0117	3.14969e-18	2.21774e-17	10
RHOG	-29.8223	1.22846e-24	1.0574e-23	3	-29.9046	8.42514e-25	8.94885e-24	3
MRPL40	-29.8222	1.22391e-24	1.05469e-23	6	-29.8897	8.84534e-25	9.33168e-24	6
C12orf76	-29.8219	1.21229e-24	1.04813e-23	7	-29.8292	1.08776e-24	1.10826e-23	7
ZNF682	-29.8218	1.2213e-24	1.05371e-23	3	-29.8373	1.06266e-24	1.0898e-23	4
TPTE	-29.8215	3.69681e-77	7.13279e-76	11	-29.9029	1.5453e-72	5.02665e-71	11
PC	-29.8214	3.50486e-301	4.1125e-299	17	-9.23631	9.27148e-42	1.75736e-40	18
CCDC85C	-29.8206	1.92447e-54	2.9694e-53	3	-10.6135	1.77015e-11	8.60681e-11	4
MNX1	-29.8204	3.61718e-26	3.67583e-25	6	-8.32609	1.48424e-08	5.86882e-08	6
TRPM2	-29.8201	1.18438e-24	1.0312e-23	3	-29.7524	1.40516e-24	1.38422e-23	3
HTR3E	-29.8201	1.23082e-30	1.39867e-29	3	-29.5123	3.22797e-24	3.00451e-23	3
TMEM52	-29.82	5.41719e-26	5.42849e-25	3	-29.8773	3.17558e-58	8.36838e-57	3
UBL4A	-29.8197	6.23034e-119	1.76107e-117	18	-6.70028	9.96011e-19	7.23324e-18	20
THAP7	-29.8193	3.44458e-81	6.86942e-80	8	-9.73657	4.63474e-18	3.23603e-17	10
OLIG1	-29.8182	5.42999e-184	2.71257e-182	15	-7.11685	9.95729e-16	6.18481e-15	17
GPR183	-29.8171	1.19356e-24	1.03651e-23	10	-20.0569	5.18159e-12	2.60561e-11	11
DUX2	-29.8164	1.20988e-24	1.04708e-23	3	-29.8544	9.60472e-25	1.00061e-23	4
DBF4	-29.8141	1.17233e-24	1.02159e-23	5	-10.3671	3.90993e-08	1.48312e-07	6
APPL1	-29.814	1.23218e-24	1.05911e-23	8	-29.9381	7.21301e-25	7.747e-24	9
ACVR2B	-29.8138	1.37488e-141	4.70301e-140	5	-29.5288	1.55887e-134	9.73591e-133	5
ACOT7	-29.8136	1.22172e-24	1.05371e-23	4	-29.7802	1.29662e-24	1.29052e-23	4
HIST1H4I	-29.8123	1.22914e-24	1.0574e-23	9	-29.7702	1.31641e-24	1.30709e-23	10
ZNF551	-29.8119	1.2072e-24	1.04619e-23	9	-8.98375	7.04441e-10	3.10267e-09	14
FBXL17	-29.8118	4.60024e-197	2.62266e-195	11	-4.58141	8.74061e-09	3.51397e-08	15
MMP16	-29.8112	1.08191e-61	1.82567e-60	4	-29.7705	1.48224e-46	3.10648e-45	4
ADAMDEC1	-29.8084	1.2536e-24	1.07569e-23	3	-3.18896	0.00439873	0.0093079	6
UTP11L	-29.8078	5.48481e-48	8.05636e-47	5	-29.6754	1.86416e-27	2.24761e-26	5
ZC2HC1B	-29.8062	1.18393e-87	2.50462e-86	7	-29.9349	3.09606e-70	9.76588e-69	7
ANGEL1	-29.8062	6.00537e-79	1.16989e-77	16	-29.7693	2.63097e-88	1.0206e-86	16
HTRA3	-29.805	5.87679e-70	1.06468e-68	7	-29.8783	3.49464e-67	1.03932e-65	8
TYW3	-29.8044	1.32598e-74	2.50571e-73	3	-9.25549	9.64036e-19	7.0051e-18	6
KIAA1147	-29.8021	9.99712e-71	1.82096e-69	5	-12.1421	1.79013e-15	1.09396e-14	6
ACMSD	-29.8005	1.27927e-24	1.09678e-23	9	-10.5426	0.000285044	0.000707991	11
ABCB1	-29.7988	3.02563e-39	3.99106e-38	10	-9.81087	1.82449e-18	1.30302e-17	13
TNIP1	-29.7984	1.31587e-24	1.12149e-23	3	-29.7437	1.45993e-24	1.42692e-23	4
PPFIA2	-29.7977	1.03664e-62	1.77001e-61	10	-15.0279	1.04448e-18	7.57204e-18	10
DYRK1A	-29.7974	1.28486e-24	1.10064e-23	9	-29.6592	1.9387e-24	1.85424e-23	10
NUDC	-29.7948	1.31516e-24	1.12149e-23	9	-29.8199	1.0902e-24	1.10984e-23	10
SEC22C	-29.7945	5.97437e-26	5.96904e-25	10	-9.66024	1.81225e-12	9.33478e-12	11
FAM133A	-29.7919	3.54081e-56	5.5916e-55	4	-6.05768	1.27829e-08	5.08343e-08	5
LRFN4	-29.7877	7.56042e-49	1.1236e-47	6	-11.3692	8.41389e-11	3.92156e-10	7
PRTFDC1	-29.7874	1.38463e-24	1.17414e-23	3	-29.6075	2.39096e-24	2.26253e-23	3
EVL	-29.7856	1.33723e-24	1.13874e-23	8	-7.33132	4.95438e-06	1.52464e-05	9
SCRIB	-29.784	4.53798e-161	1.90011e-159	8	-29.7803	2.01323e-83	7.37455e-82	8
FYCO1	-29.7835	2.66626e-89	5.72451e-88	9	-29.9678	3.88319e-100	1.75742e-98	11
IDE	-29.7834	5.02707e-97	1.16349e-95	9	-29.827	4.90336e-109	2.49991e-107	10
OSBPL3	-29.7824	1.34798e-24	1.14692e-23	7	-29.0061	1.93181e-23	1.70894e-22	7
ANKRD30B	-29.7816	3.33993e-128	1.02131e-126	7	-29.9996	2.4618e-89	9.63961e-88	7
NSFL1C	-29.7804	2.11437e-48	3.11476e-47	6	-9.13266	8.26776e-14	4.64355e-13	8
CTNNAL1	-29.7785	2.71671e-101	6.54279e-100	5	-29.8641	2.61563e-98	1.13839e-96	5
PM20D2	-29.7779	3.13023e-143	1.09298e-141	4	-29.8042	1.35229e-188	1.30941e-186	4
CCDC106	-29.7766	2.95069e-58	4.80249e-57	3	-29.2611	5.61049e-43	1.08652e-41	3
CHAD	-29.7754	2.62208e-60	4.34472e-59	4	-9.4196	1.31313e-13	7.3029e-13	7
ACSL4	-29.7753	1.45227e-80	2.87914e-79	5	-28.7682	5.63654e-58	1.47912e-56	5
DRC1	-29.7687	4.93476e-26	4.96973e-25	8	-8.86186	1.3193e-16	8.58746e-16	10
SPEN	-29.7671	2.00543e-86	4.20722e-85	7	-10.1487	8.22097e-19	5.98765e-18	9
TIMM21	-29.7622	4.78485e-124	1.4077e-122	3	-9.20365	3.37026e-15	2.02394e-14	4
FBXW11	-29.7609	6.3212e-274	5.96143e-272	12	-8.20027	1.75612e-24	1.69257e-23	15
ANKRD54	-29.7597	2.09666e-171	9.48764e-170	5	-7.67816	2.03866e-16	1.30858e-15	5
TAF4B	-29.7556	1.60678e-24	1.34222e-23	4	-27.8704	9.4299e-22	7.87886e-21	4
IFT172	-29.7538	1.16421e-76	2.23346e-75	11	-29.2748	1.94885e-29	2.51738e-28	11
ATAT1	-29.7534	7.95e-110	2.14501e-108	7	-9.52112	2.54442e-18	1.80479e-17	8
PDCL2	-29.7511	1.49779e-24	1.25638e-23	3	-17.3579	1.60239e-19	1.20939e-18	4
VPS13C	-29.7483	1.54333e-24	1.29136e-23	8	-29.2157	9.34629e-24	8.39285e-23	8
PARP16	-29.7473	4.82947e-90	1.04805e-88	3	-29.8542	8.75242e-141	5.7239e-139	3
VAPA	-29.7462	5.55698e-256	5.00674e-254	4	-3.48264	3.06003e-06	9.63276e-06	6
FBXO31	-29.7456	1.48531e-24	1.24694e-23	4	-29.7664	2.52917e-39	4.59852e-38	4
DGKI	-29.7453	1.5169e-24	1.27029e-23	9	-29.8347	1.01657e-24	1.05116e-23	10
VAV2	-29.7451	1.34967e-128	4.165e-127	12	-26.5163	3.0225e-84	1.11698e-82	13
JOSD1	-29.744	2.6733e-124	7.91092e-123	15	-29.8937	6.88638e-101	3.16242e-99	16
CCDC28B	-29.7434	1.56231e-24	1.30615e-23	6	-11.3583	2.15431e-09	9.0972e-09	9
EMID1	-29.7425	1.57057e-60	2.61961e-59	7	-29.8933	2.73377e-69	8.34901e-68	7
HIST1H3H	-29.7413	3.00053e-80	5.93693e-79	7	-28.4189	2.29756e-68	6.94886e-67	7
RPL8	-29.7397	2.04108e-37	2.59076e-36	3	-29.7495	2.22153e-34	3.49045e-33	3
PTRHD1	-29.7392	1.62682e-24	1.35671e-23	6	-30	5.88823e-25	6.39009e-24	7
FZD3	-29.7381	8.49461e-127	2.56644e-125	5	-29.8616	3.17125e-143	2.1646e-141	6
GINS4	-29.735	4.49843e-39	5.89528e-38	4	-12.725	8.42556e-19	6.13308e-18	6
PIKFYVE	-29.728	2.30147e-56	3.66311e-55	3	-15.1784	8.22066e-25	8.75399e-24	3
IPO8	-29.7264	1.19321e-128	3.69347e-127	12	-7.68326	8.44462e-17	5.56045e-16	15
ZNF687	-29.7257	1.66575e-24	1.38574e-23	4	-7.61943	3.97023e-07	1.37756e-06	7
XRN2	-29.7256	1.72106e-24	1.42849e-23	4	-29.6311	2.18548e-24	2.08229e-23	4
AURKC	-29.7226	1.72138e-24	1.42849e-23	3	-29.783	1.28423e-24	1.27921e-23	4
SEC16A	-29.721	1.77582e-24	1.47246e-23	3	-29.2622	8.22931e-24	7.42183e-23	4
STAB2	-29.7204	3.85625e-92	8.55241e-91	10	-29.8616	2.39264e-123	1.37094e-121	13
TBCK	-29.7106	1.78041e-24	1.47384e-23	8	-11.7958	4.94131e-05	0.000135207	9
CMYA5	-29.7081	7.77328e-25	7.28998e-24	3	-15.5085	9.53022e-08	3.48382e-07	5
RDH14	-29.7052	1.88487e-39	2.50596e-38	8	-11.3206	3.99465e-19	2.96477e-18	13
CHST8	-29.7048	1.65584e-289	1.79668e-287	18	-8.40887	4.26217e-32	6.1335e-31	19
RANBP1	-29.704	1.91074e-106	4.90617e-105	9	-6.49075	8.84414e-13	4.63584e-12	9
COX6C	-29.6985	5.6284e-156	2.28097e-154	12	-13.2059	1.84817e-26	2.13754e-25	13
C22orf31	-29.698	1.78535e-24	1.47672e-23	10	-11.308	2.16831e-17	1.47117e-16	12
GK	-29.6953	1.94259e-24	1.59891e-23	3	-27.9171	8.05659e-22	6.75856e-21	3
FAM13A	-29.6913	1.90602e-24	1.57266e-23	3	-29.8078	1.15275e-24	1.16802e-23	4
NPHP1	-29.6902	1.54542e-165	6.75101e-164	4	-14.762	6.21326e-53	1.47547e-51	4
VASH1	-29.6898	0	0	12	-12.2312	4.491e-53	1.0726e-51	16
AHNAK2	-29.6893	3.70714e-63	6.35124e-62	4	-13.3732	3.3317e-13	1.80705e-12	5
OLAH	-29.6843	1.93866e-102	4.77146e-101	4	-11.5602	1.25642e-19	9.54041e-19	6
IL17C	-29.6817	4.2592e-137	1.39999e-135	14	-6.28391	4.08093e-14	2.32762e-13	14
HOXC8	-29.6809	6.42601e-239	5.06601e-237	9	-3.9057	3.81609e-07	1.32703e-06	10
PKP3	-29.6795	5.41e-74	1.01662e-72	7	-29.6281	1.11081e-46	2.33588e-45	7
JAM2	-29.6763	6.29331e-37	7.91843e-36	3	-10.719	1.70609e-09	7.2708e-09	4
MZB1	-29.675	2.23045e-30	2.51889e-29	4	-25.678	1.01978e-18	7.40155e-18	4
CDK5R2	-29.6742	4.59787e-61	7.71999e-60	7	-29.5397	1.60161e-36	2.7108e-35	7
ABCC6	-29.6727	2.08171e-24	1.70508e-23	3	-29.7106	1.68584e-24	1.6286e-23	3
FRMD6	-29.6722	8.74978e-183	4.32814e-181	4	-13.609	1.91003e-35	3.10653e-34	5
SUSD1	-29.6717	6.20272e-37	7.81419e-36	5	-8.28889	1.07018e-09	4.64801e-09	9
DAPL1	-29.6707	7.85826e-26	7.82028e-25	6	-6.55832	4.8335e-06	1.48891e-05	6
BAHD1	-29.6705	6.93746e-57	1.11474e-55	5	-29.5914	2.13381e-34	3.35685e-33	5
AKAP2	-29.6589	2.19415e-24	1.7928e-23	4	-16.8146	7.34507e-09	2.96629e-08	6
ZNF746	-29.6559	2.29445e-57	3.71046e-56	5	-24.4512	4.34005e-19	3.21349e-18	5
DYSF	-29.6555	2.25828e-24	1.84223e-23	7	-29.8503	1.03288e-24	1.06537e-23	8
TUBB2B	-29.6515	2.15825e-24	1.7649e-23	3	-11.5753	4.95359e-08	1.85923e-07	4
LPHN1	-29.6497	5.25531e-100	1.25074e-98	3	-9.29318	7.97706e-14	4.48835e-13	4
PNPLA2	-29.6429	1.85213e-147	6.7717e-146	9	-9.96331	5.76127e-22	4.85587e-21	10
NAA50	-29.6396	2.31909e-24	1.88877e-23	3	-14.5931	5.20414e-07	1.78585e-06	4
FRRS1	-29.6393	6.75705e-26	6.73768e-25	11	-29.964	4.66706e-94	1.9051e-92	11
SP3	-29.6378	1.03703e-192	5.65656e-191	13	-29.7681	2.36677e-218	3.07951e-216	13
PRC1	-29.6342	6.23943e-26	6.2277e-25	8	-29.563	1.88705e-69	5.80571e-68	7
ST3GAL2	-29.6321	8.40282e-26	8.35397e-25	5	-12.459	1.03306e-12	5.39014e-12	6
COL9A3	-29.6297	2.39652e-24	1.94399e-23	4	-29.7964	1.21845e-24	1.2205e-23	3
KLF10	-29.6279	2.42014e-24	1.96e-23	3	-29.3264	6.49523e-24	5.89193e-23	3
ATP2A2	-29.6273	4.25068e-197	2.43714e-195	14	-16.6614	7.83285e-71	2.48957e-69	18
PDSS1	-29.6246	3.99874e-36	4.98164e-35	3	-11.6528	8.53073e-07	2.8606e-06	3
SPSB3	-29.618	2.14928e-76	4.11544e-75	7	-29.7101	7.04608e-87	2.69977e-85	8
GFRAL	-29.6166	2.58872e-24	2.0915e-23	8	-26.684	4.58505e-20	3.55285e-19	8
TBC1D9	-29.6159	2.38348e-24	1.93653e-23	5	-29.8845	6.7388e-53	1.59724e-51	6
RRAGA	-29.6106	1.63777e-30	1.85486e-29	3	-29.5051	2.4301e-34	3.80858e-33	5
MAP2K6	-29.6064	9.55293e-140	3.21329e-138	9	-29.9423	3.20389e-85	1.21272e-83	9
DMPK	-29.6035	5.81292e-26	5.8135e-25	17	-8.56219	5.17685e-17	3.45612e-16	18
EYA1	-29.6034	2.58489e-24	2.09008e-23	3	-29.5813	2.55638e-24	2.40813e-23	3
PDCD6	-29.591	9.71605e-59	1.58905e-57	3	-29.6995	2.42901e-67	7.24124e-66	3
GNAQ	-29.5897	0	0	9	-29.13	0	0	9
ALDH6A1	-29.588	4.04556e-297	4.69239e-295	16	-29.2982	3.68386e-252	6.30344e-250	18
TMEM190	-29.5844	2.68201e-24	2.16167e-23	6	-29.649	1.97619e-24	1.88864e-23	6
URM1	-29.5659	3.66163e-82	7.3899e-81	12	-29.8624	4.75787e-110	2.45581e-108	12
SPRED3	-29.5649	2.95745e-24	2.3742e-23	5	-29.4355	4.31684e-24	3.97652e-23	5
SPON1	-29.5629	3.48841e-197	2.01152e-195	13	-29.7274	7.75843e-196	8.28295e-194	13
WWP1	-29.5611	2.14186e-57	3.46926e-56	5	-29.6566	4.39306e-44	8.73786e-43	5
CMTM8	-29.5568	3.08339e-24	2.47136e-23	9	-13.1105	6.47598e-06	1.96243e-05	9
VAMP3	-29.5565	1.09212e-57	1.77179e-56	7	-9.53051	5.85545e-16	3.66986e-15	7
CHI3L1	-29.5502	2.94712e-24	2.36967e-23	4	-12.6086	2.95766e-12	1.50731e-11	6
CIC	-29.5486	3.10012e-24	2.4828e-23	8	-17.7595	1.00385e-09	4.36599e-09	8
DOCK6	-29.543	3.10604e-24	2.48557e-23	13	-29.7158	1.58954e-24	1.54393e-23	13
ZCWPW2	-29.5381	3.31539e-24	2.64471e-23	6	-29.6084	2.35436e-24	2.23128e-23	7
DISP1	-29.5253	3.4359e-24	2.73651e-23	9	-29.7108	1.64062e-24	1.5886e-23	9
DAD1	-29.5216	3.57216e-24	2.84056e-23	3	-29.6976	1.77263e-24	1.70453e-23	3
NLRC3	-29.5187	3.48016e-24	2.76958e-23	6	-12.3662	5.26718e-10	2.34554e-09	7
ZNF792	-29.5153	2.09817e-182	1.03281e-180	6	-6.72295	1.54949e-13	8.57542e-13	7
SLC22A7	-29.5012	3.85745e-24	3.05538e-23	6	-29.5454	3.00405e-24	2.81709e-23	7
BRPF3	-29.4978	3.68462e-24	2.92308e-23	4	-29.8439	1.00152e-24	1.03731e-23	4
LATS1	-29.4903	3.78072e-24	2.99696e-23	5	-29.9201	1.0873e-36	1.85287e-35	5
SMAP1	-29.489	8.07083e-224	5.6953e-222	12	-29.9997	9.49311e-230	1.36297e-227	14
WDR47	-29.4856	3.92482e-24	3.09659e-23	3	-29.3554	5.67897e-24	5.17781e-23	3
UQCRB	-29.4804	3.8655e-24	3.05935e-23	4	-29.7474	5.33364e-28	6.59628e-27	4
NEDD4	-29.4776	3.26742e-116	9.10817e-115	10	-29.9151	1.42938e-133	8.83883e-132	11
CPNE2	-29.4701	2.0747e-24	1.70072e-23	3	-29.8675	1.38152e-44	2.79232e-43	5
FAM192A	-29.4552	2.84664e-171	1.28239e-169	10	-29.2314	3.89334e-190	3.85966e-188	11
GFRA3	-29.4523	4.53751e-24	3.55773e-23	3	-15.2959	1.42978e-07	5.14828e-07	5
FOXN2	-29.4514	4.30854e-24	3.39138e-23	3	-29.5687	3.20954e-36	5.38126e-35	3
MYLK3	-29.4458	4.4157e-24	3.47031e-23	3	-8.65709	2.49191e-06	7.93032e-06	4
CAPN2	-29.4393	4.58533e-24	3.59244e-23	6	-10.227	5.61562e-09	2.29007e-08	6
PLK1	-29.4155	4.84994e-24	3.79386e-23	3	-7.14931	6.51124e-07	2.21071e-06	4
GATSL3	-29.3918	3.40354e-74	6.40768e-73	4	-13.8058	4.53415e-20	3.51558e-19	6
KRT40	-29.3912	1.65623e-185	8.44092e-184	6	-6.90577	9.14505e-15	5.3781e-14	8
ARHGEF5	-29.3829	3.04077e-102	7.44768e-101	10	-3.90665	1.16798e-05	3.43423e-05	14
AP4S1	-29.3793	6.25444e-164	2.6743e-162	13	-8.98132	6.14413e-15	3.63899e-14	15
PNMT	-29.366	8.54406e-245	7.18485e-243	16	-14.0627	2.31707e-59	6.2376e-58	16
ZNF169	-29.3444	2.62431e-214	1.71961e-212	8	-14.3594	3.05402e-61	8.49617e-60	11
TRPM4	-29.342	2.18924e-173	1.01338e-171	8	-3.60724	1.25928e-06	4.13394e-06	14
PRDM2	-29.3315	2.48844e-142	8.57026e-141	5	-4.50333	9.75076e-09	3.9075e-08	8
MTAP	-29.302	4.49426e-88	9.56785e-87	5	-16.2669	1.14541e-36	1.94923e-35	7
AUNIP	-29.2975	5.94509e-104	1.48863e-102	4	-29.8531	2.80018e-121	1.59713e-119	5
TP53BP2	-29.2772	8.22251e-24	6.38256e-23	5	-13.2281	6.20544e-07	2.11262e-06	6
A4GNT	-29.2336	9.78247e-24	7.58762e-23	3	-29.392	5.16975e-24	4.72733e-23	3
KYNU	-29.194	1.08946e-23	8.44372e-23	3	-7.09012	1.15551e-05	3.40011e-05	5
METTL3	-29.0982	6.5211e-84	1.33749e-82	3	-29.6639	1.62261e-99	7.26454e-98	3
GBP1	-28.6688	1.19265e-36	1.49133e-35	17	-15.7054	7.77087e-12	3.86563e-11	19
IFITM3	-28.6592	2.95009e-24	2.37017e-23	10	-29.8526	9.5665e-25	9.97455e-24	10
NXPH3	-28.0345	1.61059e-73	3.00972e-72	7	-15.4873	4.60357e-32	6.60956e-31	9
CTU1	-27.9175	8.03861e-22	5.99096e-21	11	-30	1.37153e-31	1.9358e-30	15
SIGLEC15	-27.9107	8.28468e-22	6.1607e-21	3	-8.183	7.06848e-11	3.30435e-10	6
PLEKHO1	-27.9084	9.21609e-22	6.8382e-21	8	-29.4133	4.98616e-24	4.56614e-23	8
PA2G4	-27.5659	2.71245e-21	1.98199e-20	3	-29.539	3.03224e-24	2.83926e-23	3
C16orf72	-27.4996	3.5371e-21	2.57154e-20	3	-29.5861	2.66846e-24	2.50615e-23	3
PRDX5	-26.6947	4.42097e-20	3.13506e-19	4	-16.0614	1.20062e-14	7.02104e-14	6
OSBP	-26.5831	6.76196e-20	4.76168e-19	8	-12.2327	2.58625e-05	7.30384e-05	9
NUDT3	-26.5569	6.95996e-20	4.8977e-19	4	-29.8493	9.88387e-25	1.02541e-23	4
AARS2	-26.356	1.34582e-19	9.42449e-19	3	-29.7308	1.55954e-24	1.51715e-23	3
UBLCP1	-25.9798	4.24685e-19	2.93527e-18	5	-11.391	8.86084e-05	0.000234991	7
SLC6A11	-25.942	2.21686e-118	6.24871e-117	5	-10.7199	2.05118e-31	2.8788e-30	9
LRIG3	-25.8619	8.98872e-61	1.50174e-59	8	-29.8551	7.95619e-91	3.15494e-89	11
CREB3L1	-25.7437	8.9532e-19	6.14604e-18	7	-15.5532	8.77328e-08	3.21558e-07	8
C12orf10	-25.6647	1.14619e-18	7.84147e-18	8	-29.7896	1.25071e-24	1.24823e-23	8
RFXANK	-24.8049	2.69868e-44	3.78753e-43	3	-29.3713	9.23799e-57	2.36944e-55	3
PCDHB15	-24.5921	2.85603e-17	1.88244e-16	4	-23.2372	1.31645e-15	8.11237e-15	4
C21orf58	-24.5191	3.50227e-17	2.29788e-16	3	-27.9665	6.78031e-33	1.00825e-31	4
ADAMTS16	-24.1012	1.21795e-16	7.88855e-16	3	-12.1081	3.10682e-05	8.6895e-05	4
MNS1	-23.8596	2.37329e-16	1.52153e-15	5	-15.9011	4.52407e-08	1.7088e-07	6
PPFIBP1	-19.9275	7.72829e-71	1.41279e-69	11	-13.5136	2.52043e-44	5.06968e-43	15
NR1H3	-19.7507	2.90202e-12	1.60023e-11	12	-8.30695	1.7943e-09	7.62854e-09	13
MLH1	-19.5929	1.96276e-64	3.3799e-63	9	-3.75163	0.000602181	0.00143164	12
IER3	-19.4811	2.77321e-29	3.04842e-28	14	-30	1.88229e-60	5.1448e-59	16
IKZF5	-19.4752	4.22251e-91	9.26289e-90	18	-9.62052	1.31072e-35	2.14048e-34	19
BAHCC1	-19.3334	1.24884e-33	1.49136e-32	6	-4.87054	4.83323e-08	1.81843e-07	10
RAPGEF5	-19.2034	1.12507e-126	3.38898e-125	21	-16.074	3.03687e-80	1.07157e-78	22
CALCOCO2	-19.1121	7.64782e-13	4.33806e-12	3	-14.1218	2.89401e-10	1.30597e-09	7
CRTC2	-19.0246	3.73751e-124	1.10278e-122	19	-9.36799	1.03185e-24	1.06519e-23	21
PKIB	-18.8238	7.17305e-72	1.32328e-70	17	-30	7.94096e-248	1.28819e-245	21
BRWD3	-18.4655	2.16174e-10	1.08799e-09	11	-9.20932	6.95898e-13	3.6677e-12	17
SIVA1	-18.4594	6.26232e-75	1.19232e-73	15	-10.6762	7.48549e-35	1.19262e-33	16
PARP1	-18.3683	2.67336e-10	1.33814e-09	3	-15.5777	1.32052e-16	8.59095e-16	4
EIF4G2	-18.2281	3.7472e-10	1.86823e-09	9	-29.752	1.43554e-24	1.40637e-23	9
C6orf201	-18.1402	3.78845e-10	1.88786e-09	9	-30	6.66747e-70	2.09255e-68	13
CNOT4	-18.0958	6.95883e-81	1.38504e-79	23	-29.9334	4.79398e-166	3.83856e-164	23
WDR41	-17.6855	3.61686e-34	4.39203e-33	11	-14.226	2.90003e-26	3.31725e-25	11
MMP15	-17.6252	1.21724e-46	1.76229e-45	10	-29.8743	4.12553e-134	2.56378e-132	11
PROM1	-17.5599	7.37632e-65	1.27675e-63	5	-13.0857	8.22211e-43	1.58982e-41	7
ARSK	-17.4999	1.7813e-09	8.53519e-09	5	-4.97152	3.89473e-05	0.000107798	6
ITGB6	-17.4981	1.10032e-88	2.35241e-87	19	-15.6543	6.08253e-71	1.94812e-69	18
OAZ3	-17.4954	2.00082e-96	4.60966e-95	13	-14.4589	2.61784e-41	4.91722e-40	14
TAB2	-17.4803	2.7183e-62	4.61791e-61	14	-29.6671	2.90791e-180	2.67079e-178	14
PACS1	-17.4	1.61203e-29	1.78366e-28	16	-29.9434	3.11492e-84	1.14774e-82	16
COL4A3	-17.3173	1.08676e-116	3.04624e-115	22	-9.51714	1.06373e-31	1.50989e-30	22
C20orf26	-17.2764	2.96399e-138	9.83869e-137	17	-30	0	0	17
CDHR2	-17.2585	6.64391e-51	1.00365e-49	14	-29.8102	5.06236e-107	2.51928e-105	14
ATP13A5	-17.196	2.38784e-48	3.51249e-47	11	-29.8807	1.47711e-172	1.30855e-170	11
ATP6V1B1	-17.1372	1.09336e-26	1.1457e-25	13	-16.7961	6.5096e-35	1.04245e-33	18
SAV1	-17.0966	4.1637e-09	1.95423e-08	5	-9.61294	3.09171e-11	1.47737e-10	8
ANTXR2	-17.0894	4.22397e-09	1.98067e-08	5	-17.3788	2.95204e-11	1.41225e-10	5
SEC31B	-17.0767	1.65331e-37	2.10917e-36	12	-14.1615	1.73589e-26	2.00955e-25	13
TAF7L	-17.0588	9.43024e-75	1.78873e-73	20	-29.9167	8.35565e-259	1.47001e-256	19
RALGPS2	-16.8942	6.34693e-09	2.93793e-08	6	-4.72751	0.000351809	0.000863519	12
NCF2	-16.8887	4.10542e-09	1.92867e-08	14	-29.8809	3.73928e-50	8.52323e-49	14
KIF18B	-16.8773	6.64794e-09	3.06882e-08	4	-29.9854	6.09106e-25	6.58731e-24	5
CHMP4A	-16.782	1.58998e-41	2.17404e-40	8	-8.41365	1.78454e-14	1.03485e-13	9
WRB	-16.7673	3.40165e-29	3.73109e-28	9	-9.11583	1.90731e-15	1.16159e-14	13
FAM120A	-16.7605	1.92067e-54	2.96807e-53	10	-29.9894	1.88514e-200	2.08383e-198	10
EPN1	-16.7602	2.34801e-60	3.897e-59	22	-7.53087	7.78426e-19	5.68283e-18	23
CUL9	-16.7148	2.94508e-30	3.30576e-29	15	-29.763	1.31285e-69	4.07929e-68	14
TMEM168	-16.6821	8.27977e-33	9.78351e-32	16	-10.484	2.13389e-19	1.60376e-18	18
CCL17	-16.5943	1.81273e-42	2.49553e-41	15	-29.7684	3.4512e-93	1.39964e-91	16
UNC13D	-16.5619	1.42533e-31	1.65132e-30	10	-29.9027	1.82491e-82	6.62644e-81	10
TDRP	-16.5444	2.74192e-60	4.53585e-59	8	-10.5358	5.01054e-32	7.17737e-31	11
TMEM110	-16.5422	6.7916e-13	3.86979e-12	18	-10.7356	2.21597e-19	1.66244e-18	22
GPR22	-16.5387	9.88989e-51	1.49176e-49	20	-8.8132	1.46347e-19	1.10789e-18	21
RENBP	-16.5171	1.66735e-145	5.92438e-144	16	-4.36995	1.4726e-07	5.29482e-07	17
ALDH3B2	-16.4854	8.51862e-18	5.70036e-17	3	-29.3081	1.09899e-63	3.17767e-62	4
TBL1XR1	-16.4227	3.36061e-62	5.69949e-61	12	-16.6507	2.24386e-69	6.88651e-68	15
PARP4	-16.3912	1.22187e-71	2.24589e-70	14	-10.0996	4.00108e-33	5.99969e-32	16
AP1B1	-16.2448	1.89795e-149	7.11979e-148	35	-12.9027	2.41772e-103	1.15266e-101	39
C3orf58	-16.2296	1.21732e-33	1.45717e-32	15	-6.34528	3.39833e-12	1.72485e-11	22
AGPAT3	-16.2152	4.45379e-36	5.5417e-35	10	-10.1027	5.33935e-18	3.7176e-17	10
RHOB	-16.1174	9.2387e-55	1.43207e-53	17	-7.51504	3.24599e-19	2.42208e-18	19
SUGT1	-16.1157	1.88569e-128	5.80137e-127	14	-8.33139	1.32607e-38	2.36291e-37	15
EPCAM	-16.0898	4.79588e-54	7.37733e-53	9	-3.98799	2.21114e-07	7.83082e-07	18
CCDC88A	-16.0449	6.80075e-56	1.06728e-54	10	-9.28263	3.12228e-24	2.91048e-23	12
TTN	-16.0262	2.79928e-21	2.04248e-20	9	-29.6308	2.48577e-29	3.20431e-28	9
DAPK1	-15.9991	8.34912e-92	1.84357e-90	16	-29.9314	1.60066e-284	3.17363e-282	16
TTC7A	-15.9981	7.08739e-33	8.39423e-32	11	-8.58637	2.00656e-14	1.16037e-13	14
SHPRH	-15.9398	4.26288e-08	1.85657e-07	8	-6.98259	0.00473614	0.00995778	11
ORAI1	-15.9389	3.5406e-41	4.83466e-40	16	-29.7783	7.72466e-153	5.60981e-151	15
GUCD1	-15.9333	4.87544e-94	1.10807e-92	19	-29.9751	0	0	21
PRKAB1	-15.9294	4.53999e-87	9.5643e-86	18	-12.0218	3.20523e-46	6.66166e-45	22
LMTK3	-15.9248	2.42348e-15	1.50866e-14	9	-29.8966	9.0498e-89	3.53253e-87	11
SH3GL3	-15.8949	2.75553e-78	5.34731e-77	9	-29.8878	4.87181e-283	9.5084e-281	10
NEURL2	-15.8827	4.8415e-08	2.09918e-07	4	-6.86286	0.00118146	0.00270285	8
DTL	-15.8642	2.09468e-45	2.96873e-44	9	-29.8993	7.56491e-155	5.69237e-153	13
PTPRU	-15.8083	6.33072e-39	8.27504e-38	4	-29.8505	6.46663e-90	2.5481e-88	3
DEF8	-15.7991	1.0246e-38	1.33409e-37	11	-30	3.9306e-86	1.50144e-84	10
ZMYND19	-15.7986	1.72952e-19	1.20696e-18	6	-29.7735	2.82532e-28	3.52911e-27	5
ZSCAN25	-15.699	1.3172e-50	1.98386e-49	6	-9.81282	3.79166e-26	4.31737e-25	10
PTPRS	-15.6025	2.10102e-40	2.84582e-39	12	-10.3969	5.16072e-25	5.625e-24	15
TMOD1	-15.5972	8.81477e-38	1.13168e-36	7	-6.9819	1.01969e-14	5.97981e-14	9
KCNN4	-15.576	7.87694e-55	1.22286e-53	8	-3.01169	0.00138823	0.00314822	7
HLA-C	-15.5589	9.62998e-33	1.13656e-31	5	-7.99103	5.00171e-18	3.48641e-17	6
SLC45A3	-15.5326	5.02359e-19	3.46975e-18	10	-5.90377	7.71572e-10	3.38759e-09	12
BAG2	-15.5142	9.33527e-10	4.52895e-09	3	-14.602	1.89828e-11	9.19759e-11	4
RAB3GAP1	-15.477	1.38836e-85	2.89462e-84	12	-8.17382	3.03495e-21	2.46486e-20	15
CCDC127	-15.4689	7.67026e-18	5.1429e-17	4	-29.7863	4.1845e-53	1.00324e-51	3
BIN2	-15.4681	1.72809e-35	2.13181e-34	12	-29.184	1.86602e-87	7.19398e-86	13
C17orf66	-15.4545	4.02318e-27	4.25109e-26	5	-8.57602	5.9392e-13	3.16226e-12	6
CTRB1	-15.4527	1.30121e-71	2.38736e-70	28	-9.92028	2.4408e-31	3.41411e-30	29
AAMDC	-15.3637	8.16274e-112	2.22622e-110	18	-29.9922	0	0	21
BEX2	-15.3484	1.30534e-39	1.74235e-38	6	-5.47723	6.50375e-10	2.87163e-09	7
C17orf49	-15.3468	3.07763e-57	4.96902e-56	17	-14.0754	3.10521e-44	6.21589e-43	18
STAP2	-15.3086	5.12397e-18	3.44937e-17	6	-7.30872	7.06909e-10	3.11244e-09	8
SESTD1	-15.2874	1.0232e-82	2.07332e-81	16	-3.41086	9.96253e-07	3.31492e-06	22
QRSL1	-15.267	1.52538e-07	6.36582e-07	10	-29.5262	3.06801e-24	2.8706e-23	10
NCLN	-15.2562	8.3354e-13	4.71218e-12	3	-16.3604	1.06226e-13	5.93943e-13	5
CCZ1	-15.2383	1.46863e-27	1.56328e-26	10	-9.36361	1.03097e-19	7.86718e-19	14
GRIN2C	-15.2082	5.74354e-61	9.62759e-60	25	-8.69086	7.9253e-37	1.35609e-35	24
HIST1H3E	-15.159	4.67691e-108	1.22266e-106	22	-10.4696	1.00262e-66	2.96772e-65	20
FIGNL2	-15.1176	1.66429e-22	1.26179e-21	4	-15.3012	2.82957e-21	2.30105e-20	3
ZNF514	-15.1081	4.98599e-99	1.17281e-97	29	-30	0	0	29
SMARCC2	-15.0484	1.21089e-131	3.81845e-130	15	-14.6763	5.11211e-105	2.47501e-103	16
LRRK1	-15.036	1.8627e-29	2.05426e-28	4	-29.7024	1.00184e-117	5.51277e-116	5
C16orf70	-15.0293	1.55974e-67	2.76129e-66	10	-3.87418	0.000247517	0.00062083	10
AGFG2	-14.9877	1.74505e-22	1.32202e-21	3	-29.0712	1.0322e-54	2.57865e-53	3
PSMD10	-14.9014	5.57526e-23	4.25889e-22	10	-29.6631	2.59114e-39	4.70435e-38	9
CELSR3	-14.8341	7.67911e-74	1.43766e-72	14	-29.7657	1.28953e-217	1.66057e-215	14
FAM103A1	-14.7472	8.69139e-12	4.67012e-11	5	-11.7125	3.52481e-13	1.90764e-12	5
CD200	-14.7374	1.99196e-12	1.10566e-11	10	-29.8589	4.57625e-53	1.09088e-51	11
GPR75-ASB3	-14.7149	1.51675e-47	2.20859e-46	9	-3.90684	1.90012e-05	5.44618e-05	9
ACAD10	-14.7052	5.29574e-160	2.17233e-158	20	-29.3639	0	0	21
GPR179	-14.6828	3.40718e-29	3.7331e-28	6	-29.67	1.81817e-58	4.84237e-57	6
MAT2B	-14.6464	3.78252e-20	2.68799e-19	6	-11.5123	1.3785e-16	8.95418e-16	7
STX1A	-14.5346	1.2641e-12	7.09455e-12	6	-6.92587	2.92428e-09	1.22205e-08	7
TGFBRAP1	-14.5018	4.3864e-10	2.17402e-09	5	-8.89013	6.86905e-10	3.02864e-09	5
TRPM5	-14.4514	8.27865e-68	1.47597e-66	22	-5.67657	1.28015e-10	5.89396e-10	24
ZNF32	-14.3613	3.28411e-19	2.27453e-18	9	-7.19324	7.91608e-11	3.69506e-10	11
FAM69B	-14.33	3.89859e-40	5.26649e-39	14	-15.2142	5.83443e-44	1.15496e-42	13
C1orf233	-14.3219	8.50618e-07	3.32826e-06	7	-16.2862	1.28149e-09	5.52542e-09	7
FBXW8	-14.3205	1.06136e-20	7.63923e-20	4	-6.63551	1.2336e-08	4.91511e-08	7
LIF	-14.3192	1.84857e-28	1.99507e-27	18	-13.89	5.65729e-31	7.83428e-30	22
GDF15	-14.308	8.62744e-07	3.3744e-06	10	-14.7646	4.57529e-08	1.72659e-07	10
FAM110B	-14.2781	1.51049e-50	2.26821e-49	6	-13.2734	1.7257e-54	4.30255e-53	7
COPS5	-14.2333	9.13548e-07	3.56895e-06	7	-17.0714	4.27993e-09	1.76554e-08	7
RBPJ	-14.22	2.89374e-25	2.85164e-24	6	-7.59916	8.24586e-14	4.63334e-13	8
FAM166B	-14.2099	1.03189e-06	4.01265e-06	9	-29.8403	1.03388e-24	1.06552e-23	9
AQP8	-14.1997	1.11002e-31	1.29047e-30	11	-16.5559	1.65709e-36	2.80091e-35	12
PGM5	-14.1967	6.05961e-25	5.92315e-24	5	-6.46503	2.70219e-10	1.22294e-09	7
ELAVL3	-14.1512	1.13797e-06	4.40816e-06	8	-9.73455	2.69935e-11	1.29583e-10	9
FUT2	-14.1325	5.48528e-46	7.82913e-45	20	-15.7954	1.70093e-73	5.60587e-72	19
CTRB2	-13.979	1.53602e-82	3.1062e-81	26	-8.54904	1.66992e-30	2.25016e-29	27
SMPX	-13.9687	2.68863e-66	4.70207e-65	7	-3.78497	1.43616e-05	4.18113e-05	6
CHPF	-13.954	1.60943e-06	6.15881e-06	6	-11.2025	0.000115716	0.000302324	8
CDK5RAP2	-13.7486	6.34773e-57	1.02161e-55	8	-3.2628	0.000596792	0.00141964	8
ZBTB4	-13.6963	1.66902e-11	8.841e-11	6	-5.92444	1.95141e-08	7.63868e-08	10
TAS2R20	-13.673	1.22318e-79	2.40607e-78	17	-5.78236	2.6751e-15	1.6119e-14	19
ZNF816	-13.652	3.83528e-08	1.67758e-07	6	-11.8034	1.25274e-07	4.53039e-07	6
TRPV6	-13.6379	1.42458e-39	1.89649e-38	5	-3.60425	0.000781755	0.00183069	6
CACUL1	-13.5994	6.36597e-66	1.1114e-64	10	-4.49501	1.47183e-06	4.79209e-06	13
KANK4	-13.574	2.09617e-78	4.07563e-77	25	-3.75405	5.90661e-10	2.61536e-09	26
DDX19B	-13.5639	8.87231e-49	1.31663e-47	9	-13.2227	2.50543e-46	5.22459e-45	14
NOMO3	-13.4881	1.7969e-26	1.86549e-25	9	-12.475	8.22393e-27	9.60048e-26	10
SND1	-13.4342	4.26277e-46	6.10151e-45	16	-11.5301	1.96035e-37	3.41041e-36	16
TMEM110-MUSTN1	-13.421	5.5451e-33	6.58301e-32	15	-10.2811	3.18398e-27	3.80235e-26	19
EREG	-13.3871	5.93867e-65	1.02968e-63	9	-29.3512	0	0	13
NOMO1	-13.3695	8.91659e-29	9.65421e-28	14	-10.3005	7.95224e-19	5.79868e-18	16
ZDHHC3	-13.3556	4.45828e-06	1.63714e-05	4	-9.65267	0.00090308	0.00209867	4
HSH2D	-13.3534	4.4748e-12	2.43951e-11	7	-9.83513	8.70426e-11	4.05236e-10	8
PLEKHA8	-13.2527	1.21349e-43	1.68901e-42	14	-4.05192	5.56538e-07	1.90354e-06	20
MKLN1	-13.2524	9.1006e-48	1.33093e-46	15	-7.66049	5.66559e-21	4.55105e-20	17
RNF208	-13.2523	1.0356e-44	1.45953e-43	14	-29.9843	1.51517e-232	2.2007e-230	14
IFIT1	-13.2319	5.44873e-06	1.98209e-05	3	-14.0886	1.26047e-06	4.13677e-06	3
ZNF544	-13.2062	4.23996e-18	2.8619e-17	7	-6.59214	2.41412e-09	1.01668e-08	6
OSBPL7	-13.1945	5.73953e-06	2.08337e-05	4	-4.84472	0.000441479	0.00106684	9
PRKAR2A	-13.1687	1.73346e-45	2.46024e-44	15	-4.21381	4.26624e-05	0.000117507	16
CARNS1	-13.1431	8.00146e-16	5.04958e-15	5	-29.7004	7.23991e-46	1.49725e-44	4
E2F7	-13.0977	1.4324e-66	2.51381e-65	20	-12.7266	1.76795e-53	4.27147e-52	21
ANKRD23	-13.0556	6.61762e-72	1.22305e-70	6	-6.33762	1.71775e-20	1.35031e-19	8
SARDH	-13.0169	6.56029e-34	7.90919e-33	4	-10.0751	2.70922e-23	2.3798e-22	4
F10	-12.9938	8.11444e-16	5.11767e-15	6	-9.13692	1.21064e-06	3.98368e-06	6
NT5C2	-12.9866	4.59197e-15	2.82546e-14	4	-9.97505	6.05366e-10	2.67668e-09	7
C1orf27	-12.9653	6.6818e-32	7.82205e-31	9	-7.45774	3.2942e-16	2.09344e-15	10
NOMO2	-12.9585	4.19999e-39	5.5185e-38	13	-9.66559	5.12622e-25	5.59228e-24	15
ZDBF2	-12.8968	4.72421e-12	2.56992e-11	8	-10.6706	6.72593e-10	2.96763e-09	6
CYP2E1	-12.8831	8.77693e-54	1.34602e-52	6	-3.01918	0.00129513	0.00294672	6
SAP25	-12.848	1.10177e-36	1.3794e-35	6	-5.98341	5.6282e-14	3.18685e-13	9
ZFP37	-12.8462	1.65828e-20	1.18511e-19	8	-16.2688	1.70279e-30	2.29197e-29	8
ZNF391	-12.8299	1.43337e-50	2.1556e-49	17	-12.7097	1.03187e-67	3.1058e-66	21
DDTL	-12.807	2.02965e-79	3.98468e-78	13	-8.80845	5.04636e-35	8.13343e-34	14
FBXO21	-12.7651	1.36947e-68	2.45459e-67	13	-4.52929	1.2486e-09	5.38546e-09	15
ARHGEF6	-12.7122	1.31165e-56	2.09097e-55	10	-3.55673	1.23983e-05	3.63368e-05	11
AIFM2	-12.6489	1.38772e-05	4.82713e-05	4	-14.1929	1.06618e-06	3.53536e-06	3
LOXL4	-12.6374	7.04184e-15	4.31184e-14	7	-4.79219	1.45687e-06	4.74764e-06	7
VDAC1	-12.6182	1.85751e-17	1.23398e-16	3	-10.0007	1.70569e-16	1.09994e-15	5
JUN	-12.5862	3.18539e-28	3.4305e-27	10	-13.3565	4.69455e-35	7.5958e-34	10
SERINC2	-12.552	4.09078e-17	2.67012e-16	8	-8.75073	2.04143e-15	1.23965e-14	9
CBWD5	-12.5234	3.87998e-14	2.31264e-13	4	-29.8578	3.53726e-37	6.12815e-36	3
LDB2	-12.4542	3.55663e-39	4.68538e-38	18	-29.8908	1.73566e-214	2.16802e-212	18
RAD51B	-12.4394	3.12351e-44	4.37768e-43	11	-3.51192	8.93988e-06	2.66003e-05	12
SLITRK5	-12.4335	9.65558e-36	1.19698e-34	15	-29.9474	1.0778e-174	9.6163e-173	14
PCDHA4	-12.4039	8.48943e-72	1.56326e-70	26	-7.85504	4.34454e-30	5.74869e-29	31
SET	-12.3998	3.43593e-25	3.38264e-24	12	-6.63165	4.61204e-11	2.17886e-10	17
ATG12	-12.3914	6.16501e-16	3.90528e-15	7	-16.199	3.10243e-20	2.41298e-19	7
CYB561A3	-12.3747	1.11859e-54	1.73125e-53	15	-9.96091	6.86991e-35	1.09734e-33	17
SLC45A1	-12.354	1.64714e-33	1.96469e-32	5	-4.13374	9.38944e-07	3.13174e-06	7
PELO	-12.3478	2.20609e-05	7.50307e-05	3	-13.9933	1.50571e-06	4.89533e-06	3
TMEM257	-12.3397	7.93636e-22	5.91912e-21	5	-7.93065	7.34249e-14	4.1369e-13	6
MAP4K2	-12.3354	6.57439e-07	2.59758e-06	3	-29.8269	1.07898e-24	1.10201e-23	3
CNTN6	-12.3153	1.16633e-23	9.0326e-23	17	-8.34531	1.56412e-18	1.11962e-17	18
SNAI3	-12.29	9.79659e-57	1.5642e-55	25	-8.28577	3.80262e-51	8.74742e-50	25
TAF6L	-12.2111	2.39259e-77	4.62522e-76	23	-5.27723	9.17534e-09	3.68281e-08	24
FAM149A	-12.1971	2.30113e-62	3.91581e-61	8	-3.28868	0.000198306	0.000504592	8
ARL6	-12.1809	7.58746e-32	8.87196e-31	19	-30	5.06597e-236	7.53322e-234	19
CDYL	-12.1602	3.05674e-22	2.30363e-21	4	-9.51208	3.27951e-13	1.78028e-12	4
PRPS1	-12.1242	3.8593e-27	4.0822e-26	15	-5.37894	3.97206e-10	1.78023e-09	14
NFKBIB	-12.0749	1.12574e-34	1.37529e-33	6	-3.15129	0.00339764	0.00731471	6
ZBTB44	-12.0671	2.54664e-12	1.40812e-11	4	-11.7889	9.15784e-15	5.38308e-14	4
TBC1D10B	-12.0527	2.59271e-20	1.84637e-19	14	-29.8991	4.56889e-98	1.9816e-96	15
IYD	-12.0441	2.50349e-59	4.10775e-58	21	-5.64146	1.41236e-29	1.83197e-28	22
DTNB	-12.0244	6.71689e-19	4.62347e-18	9	-29.9276	3.4253e-70	1.07772e-68	10
LMO3	-11.9914	1.25566e-15	7.87496e-15	7	-9.75273	6.14431e-13	3.26173e-12	7
IL25	-11.9507	2.02179e-47	2.93975e-46	21	-5.83961	3.20886e-25	3.5408e-24	22
TRIM6	-11.9453	2.26924e-30	2.55853e-29	8	-10.9667	7.12941e-27	8.35398e-26	8
GRIPAP1	-11.9051	4.85024e-45	6.84528e-44	7	-3.47848	2.06674e-09	8.74809e-09	7
HOXB6	-11.9	2.19143e-59	3.60747e-58	26	-30	0	0	27
SGIP1	-11.8934	7.53408e-83	1.53279e-81	30	-18.8365	1.11739e-156	8.51055e-155	34
KCNH4	-11.8456	1.47562e-30	1.67309e-29	8	-3.03497	0.00248503	0.00545432	7
PTGES	-11.8147	4.87642e-05	0.000159714	5	-15.2646	1.5089e-07	5.41756e-07	7
RAB4A	-11.7819	5.14189e-05	0.000168027	5	-7.51902	0.000330379	0.000814761	6
WDR13	-11.7749	6.3048e-33	7.47612e-32	12	-4.71523	1.2483e-09	5.38546e-09	17
TUBB3	-11.7732	9.07079e-43	1.2556e-41	15	-4.36548	4.48981e-10	2.00724e-09	16
GPR3	-11.7663	1.63865e-66	2.87076e-65	25	-6.14601	2.09518e-21	1.715e-20	29
USP43	-11.7512	1.30548e-05	4.55834e-05	4	-12.6052	5.64995e-10	2.50794e-09	5
TMED6	-11.7508	7.3696e-54	1.13191e-52	16	-3.02142	2.95448e-06	9.31458e-06	21
KIF23	-11.7435	9.83992e-16	6.18273e-15	16	-9.87482	2.17167e-15	1.31745e-14	17
CXCL17	-11.7341	3.81779e-41	5.20613e-40	27	-10.1816	1.65742e-39	3.02231e-38	32
CDC42	-11.7317	3.04253e-30	3.40757e-29	17	-3.45968	0.000254794	0.000637674	16
ANKS1A	-11.7009	1.42935e-30	1.62245e-29	7	-13.9562	4.51515e-44	8.9664e-43	9
TMEM87B	-11.6959	1.33133e-20	9.54827e-20	15	-29.9904	1.70949e-97	7.33786e-96	14
ASTN1	-11.6909	5.81557e-05	0.000188698	4	-11.071	0.000139663	0.000362311	5
CCDC125	-11.6422	9.31805e-12	5.00417e-11	4	-29.841	9.14666e-27	1.06577e-25	3
TADA1	-11.609	6.68161e-69	1.19972e-67	29	-7.82577	9.49184e-37	1.61971e-35	30
ARHGAP10	-11.5997	6.65014e-05	0.000214124	5	-13.8205	1.99583e-06	6.41862e-06	4
DCTN2	-11.5937	3.4507e-38	4.44713e-37	12	-4.29628	1.52174e-07	5.46053e-07	15
PLK4	-11.5901	2.78182e-18	1.88652e-17	6	-4.66341	5.54862e-07	1.89832e-06	7
ZNF521	-11.5051	7.63881e-05	0.000244476	7	-11.4444	7.37854e-05	0.000197314	7
FAM177A1	-11.4944	1.97146e-44	2.77075e-43	30	-16.639	4.93674e-80	1.73704e-78	34
RAB36	-11.4864	2.34839e-51	3.55819e-50	16	-29.986	0	0	16
ARL17A	-11.4608	4.43285e-15	2.72922e-14	6	-10.5793	3.7399e-11	1.77759e-10	7
UNK	-11.458	1.77033e-17	1.17684e-16	16	-11.6188	1.79979e-21	1.47805e-20	15
MRC1	-11.4031	9.77832e-37	1.22575e-35	8	-10.1865	2.80205e-33	4.23734e-32	9
GINM1	-11.3291	6.49843e-67	1.14243e-65	21	-27.7012	0	0	22
ITGAL	-11.3255	9.88009e-05	0.000311562	9	-29.8722	9.3482e-25	9.79601e-24	10
AMZ1	-11.3099	1.39424e-27	1.48723e-26	8	-14.4743	5.92945e-45	1.20823e-43	8
RNF39	-11.2847	6.44567e-29	6.99389e-28	10	-29.6671	6.75936e-191	6.80896e-189	11
CD3E	-11.2714	1.90307e-31	2.18972e-30	20	-6.57635	1.28074e-15	7.90013e-15	24
MT2A	-11.2544	6.93722e-26	6.91051e-25	9	-11.1599	4.5727e-32	6.57279e-31	10
THAP4	-11.1974	1.62161e-35	2.0029e-34	25	-15.7621	3.87274e-95	1.61787e-93	29
SPIN2B	-11.1682	7.55013e-06	2.70844e-05	6	-13.0561	1.64358e-11	8.00701e-11	7
CERCAM	-11.138	0.000129839	0.000401042	3	-12.736	1.18887e-05	3.48922e-05	4
RCE1	-11.1324	7.09462e-59	1.1622e-57	21	-5.1763	1.42777e-14	8.32209e-14	21
DUSP23	-11.1162	3.26579e-23	2.50609e-22	21	-9.68711	2.57203e-23	2.26407e-22	24
RNF10	-11.1157	0.000132711	0.000409163	8	-29.8653	9.36764e-25	9.79993e-24	9
RHOA	-11.1017	3.12695e-53	4.77368e-52	39	-13.8001	2.00475e-97	8.57578e-96	42
GRIN2A	-11.0554	1.65393e-52	2.51732e-51	13	-4.78085	4.44463e-11	2.10295e-10	12
MSANTD3-TMEFF1	-11.0482	2.02725e-20	1.44675e-19	12	-3.98467	6.25977e-07	2.12996e-06	14
POTEC	-11.0461	4.13448e-22	3.10655e-21	4	-10.448	1.31627e-24	1.30709e-23	5
PTPN12	-11.0438	1.00033e-14	6.08827e-14	9	-3.86863	4.94339e-05	0.000135234	12
CKAP4	-11.016	0.000153475	0.000468424	3	-8.40888	0.0038302	0.0081734	4
RNF31	-11.0137	2.22879e-22	1.68596e-21	10	-6.10483	4.68426e-13	2.50905e-12	14
RAD1	-10.9562	8.24449e-14	4.85386e-13	4	-5.32542	8.50349e-08	3.12036e-07	3
PCDH12	-10.9465	3.15641e-38	4.07306e-37	27	-6.14634	6.32907e-21	5.07097e-20	26
TFCP2	-10.9318	3.92513e-40	5.29526e-39	17	-11.1767	4.84077e-41	9.06539e-40	19
ZC2HC1C	-10.9234	2.49282e-39	3.29254e-38	6	-3.42769	7.24502e-05	0.000193951	7
BEND3	-10.8571	1.30649e-08	5.87774e-08	6	-5.04166	5.84396e-06	1.78128e-05	6
RANGRF	-10.8137	1.50788e-40	2.04517e-39	14	-3.90423	7.31298e-08	2.70256e-07	15
ROPN1L	-10.8037	9.85106e-32	1.14921e-30	4	-29.8862	4.15647e-202	4.76316e-200	5
MTRNR2L6	-10.7993	0.000206284	0.000617141	5	-11.2864	0.000104085	0.000273595	5
FAM159B	-10.7956	1.20629e-11	6.44059e-11	8	-29.816	9.11641e-47	1.92353e-45	6
LLGL1	-10.7929	3.44072e-21	2.50327e-20	10	-12.7781	6.49236e-38	1.1422e-36	9
NME3	-10.7734	2.51051e-30	2.82741e-29	10	-3.46858	3.9505e-05	0.000109293	9
RIC8A	-10.7496	1.44381e-67	2.56055e-66	40	-9.69599	9.91864e-73	3.24329e-71	44
TASP1	-10.7329	2.04533e-19	1.42537e-18	6	-8.91882	3.92409e-19	2.91414e-18	8
PLEKHG1	-10.7053	4.06305e-44	5.68658e-43	23	-6.65641	8.93227e-24	8.02683e-23	22
MAVS	-10.6844	2.09985e-39	2.78444e-38	15	-4.51895	1.44849e-05	4.21456e-05	18
TXK	-10.676	7.66165e-28	8.1987e-27	15	-29.9618	2.84128e-178	2.59054e-176	16
RAB14	-10.6479	1.02866e-67	1.83073e-66	29	-12.2324	4.61335e-101	2.1264e-99	29
ITGB4	-10.6409	8.0275e-60	1.32362e-58	24	-15.9828	6.00449e-176	5.43494e-174	27
BST2	-10.6324	2.85251e-38	3.68562e-37	15	-29.9207	0	0	17
CABLES1	-10.618	2.17182e-20	1.54882e-19	5	-12.1095	2.07119e-20	1.62304e-19	5
EMB	-10.5982	3.60645e-56	5.68636e-55	15	-11.5272	4.80861e-77	1.63218e-75	15
YIPF6	-10.5856	0.000274075	0.000803747	6	-9.16349	0.00162734	0.00366916	4
NFATC4	-10.5854	5.50834e-20	3.89248e-19	15	-8.81108	1.6277e-24	1.57732e-23	17
RBM15B	-10.5716	5.02524e-29	5.4703e-28	4	-5.72493	1.41613e-10	6.50652e-10	4
NRIP3	-10.5597	4.60669e-27	4.86257e-26	10	-10.9669	3.06456e-30	4.08097e-29	11
REEP4	-10.4541	2.08553e-25	2.06527e-24	12	-5.07206	1.69238e-09	7.21978e-09	17
TPD52	-10.451	7.17153e-29	7.77313e-28	10	-3.70777	5.61838e-08	2.09615e-07	13
ROCK2	-10.4458	3.21996e-56	5.09289e-55	24	-6.05856	9.64935e-16	6.00249e-15	23
TMEFF1	-10.429	5.51859e-26	5.52461e-25	11	-4.41677	2.24534e-08	8.72095e-08	12
XPOT	-10.4146	5.74677e-16	3.64721e-15	6	-7.58195	2.07946e-10	9.47974e-10	7
NRXN1	-10.3989	0.000350534	0.00101238	3	-10.6804	3.98256e-05	0.000110082	4
SETD6	-10.3504	8.18728e-08	3.49631e-07	7	-6.05592	3.76098e-06	1.17182e-05	7
ADAMTS6	-10.3336	5.15954e-07	2.06035e-06	4	-29.7542	1.37963e-24	1.36445e-23	3
ZNF619	-10.3266	2.09967e-22	1.58948e-21	12	-3.85938	0.000895456	0.00208214	11
ZFP3	-10.2677	2.23158e-30	2.51889e-29	10	-7.68342	7.12072e-25	7.65447e-24	12
ANO1	-10.2583	1.88542e-31	2.17189e-30	9	-3.26063	0.00052155	0.00124874	8
ZNF883	-10.2566	1.66549e-18	1.1348e-17	7	-5.42154	6.51373e-09	2.64423e-08	11
CNKSR3	-10.2473	2.26378e-34	2.75892e-33	20	-9.68932	1.61276e-31	2.27113e-30	21
RPL22	-10.238	1.86608e-31	2.15207e-30	11	-7.55212	1.91282e-22	1.63315e-21	13
LZIC	-10.1819	3.02226e-35	3.71018e-34	23	-8.85279	4.70129e-34	7.28584e-33	24
IGDCC3	-10.1794	6.82466e-13	3.88644e-12	6	-3.354	0.000239984	0.000603268	8
SLC47A2	-10.1691	3.2518e-46	4.66769e-45	13	-11.3287	6.58622e-54	1.60995e-52	16
TNFAIP8L2	-10.1313	1.84387e-20	1.31681e-19	13	-27.2348	3.29476e-96	1.39508e-94	12
RAD50	-10.1241	0.000500841	0.00141173	3	-11.9153	4.14119e-05	0.000114239	3
ARL17B	-10.1072	1.23966e-11	6.60826e-11	4	-10.46	8.17639e-10	3.58355e-09	5
RSPH4A	-10.1016	8.13227e-24	6.31738e-23	7	-3.08132	0.00342646	0.00737167	5
USP42	-10.0816	2.60967e-16	1.66989e-15	6	-14.1686	5.51464e-22	4.65428e-21	5
ATXN7L3B	-10.079	0.00010454	0.000328633	7	-10.6014	0.000265846	0.000662707	6
RAB26	-10.0723	0.00053471	0.00149591	3	-29.6456	2.13964e-24	2.04173e-23	3
VAMP2	-10.0696	1.96781e-38	2.54905e-37	14	-4.42764	1.72e-07	6.1402e-07	14
TGM4	-10.0346	6.57145e-14	3.87793e-13	7	-9.07025	1.8549e-15	1.13243e-14	6
ZNF700	-10.0337	1.74486e-33	2.07879e-32	15	-3.27691	1.62464e-06	5.27237e-06	25
CCDC158	-10.0133	5.7203e-09	2.65518e-08	5	-5.41575	7.64035e-05	0.000203748	6
C19orf18	-10.0108	1.21753e-21	8.99424e-21	10	-4.70879	1.79241e-09	7.6231e-09	10
FAM73B	-10.004	8.44214e-31	9.62595e-30	18	-12.7766	6.51297e-55	1.6336e-53	19
ODF3B	-9.96676	7.03695e-10	3.4404e-09	5	-5.34275	1.35067e-05	3.94649e-05	4
DICER1	-9.96114	1.59682e-16	1.03028e-15	10	-9.23864	5.94642e-13	3.16475e-12	9
AIF1	-9.95617	1.97736e-06	7.48726e-06	5	-13.805	3.70614e-08	1.40752e-07	5
RNF111	-9.9527	6.03633e-23	4.60413e-22	10	-3.75377	0.00219484	0.00485665	11
CASP6	-9.95115	2.26747e-13	1.31803e-12	6	-8.47701	6.77091e-10	2.98642e-09	7
HLTF	-9.94175	7.07357e-22	5.28345e-21	7	-14.4329	2.89265e-43	5.65448e-42	11
MERTK	-9.92765	2.3464e-26	2.41607e-25	9	-3.53282	0.000242069	0.000608143	9
TUBA1A	-9.90367	3.43832e-12	1.88873e-11	8	-15.4479	5.81461e-19	4.28244e-18	13
PSPH	-9.88083	6.80445e-31	7.76739e-30	9	-8.21464	1.54607e-26	1.79147e-25	9
LUZP2	-9.86608	3.03847e-17	1.99877e-16	8	-8.34403	1.81045e-16	1.16629e-15	8
RANBP3	-9.86582	1.65563e-07	6.88661e-07	3	-3.82243	0.00327936	0.00707713	4
INPP5B	-9.82005	5.45164e-39	7.13522e-38	14	-14.3518	5.8956e-93	2.38323e-91	17
EGLN1	-9.80954	3.68659e-21	2.67636e-20	14	-8.86112	3.69444e-24	3.42592e-23	18
TMTC4	-9.77061	1.30486e-20	9.36513e-20	8	-29.6272	2.58247e-137	1.63745e-135	7
ADAM9	-9.75655	5.82161e-23	4.44371e-22	10	-3.51817	1.36194e-05	3.97756e-05	14
LAMA1	-9.74185	1.19124e-33	1.42765e-32	12	-3.82846	1.54122e-05	4.46771e-05	10
HMGCS2	-9.72648	1.49169e-32	1.75031e-31	6	-6.60469	1.39997e-16	9.08892e-16	7
TENM3	-9.72534	1.47183e-42	2.02899e-41	12	-5.22461	5.12036e-12	2.57585e-11	12
RAD21L1	-9.70151	0.000131796	0.000406714	5	-5.33413	0.000104595	0.00027482	4
SMARCAL1	-9.69565	8.45012e-12	4.54532e-11	5	-29.231	4.41889e-29	5.65537e-28	3
SPG11	-9.69165	5.58418e-15	3.42345e-14	9	-6.56789	3.61554e-11	1.71979e-10	9
VNN2	-9.6789	4.72304e-45	6.6751e-44	19	-8.60853	6.03583e-35	9.67825e-34	21
TMX1	-9.66811	8.71131e-18	5.82543e-17	6	-3.57045	1.86062e-05	5.34522e-05	9
DLST	-9.63603	8.04522e-25	7.51707e-24	18	-4.67185	3.71823e-10	1.66886e-09	19
CLEC4C	-9.62145	5.79485e-44	8.09914e-43	22	-5.76091	4.63354e-23	4.05305e-22	21
PLEKHG4B	-9.60514	2.75372e-15	1.71002e-14	11	-7.24617	2.23988e-12	1.14807e-11	13
STAG1	-9.59786	4.74584e-37	5.99377e-36	7	-13.1183	1.66991e-70	5.28072e-69	6
HPSE	-9.52273	7.59236e-15	4.6433e-14	7	-10.7213	2.50932e-19	1.87801e-18	6
C15orf41	-9.52181	0.00107163	0.00284723	3	-8.47151	0.00358717	0.00769093	3
PBX4	-9.51772	1.22876e-05	4.29789e-05	3	-4.11785	0.00184652	0.00413126	5
ASAP2	-9.50674	5.53994e-15	3.39839e-14	4	-6.37417	3.28994e-09	1.36845e-08	4
ST3GAL3	-9.5058	3.00478e-23	2.31283e-22	10	-29.9669	5.87506e-142	3.92435e-140	11
HOXA13	-9.50393	1.74527e-29	1.92897e-28	11	-8.41173	1.2186e-25	1.3615e-24	11
NOXRED1	-9.4893	6.71697e-24	5.22598e-23	8	-9.69093	1.22215e-28	1.5389e-27	12
DDT	-9.46735	8.34401e-39	1.08925e-37	15	-5.04617	3.37037e-14	1.93204e-13	17
ZFYVE1	-9.45844	1.73e-16	1.11407e-15	7	-29.6306	4.92839e-91	1.96053e-89	7
UBE2E1	-9.45584	2.39e-29	2.63005e-28	10	-3.51165	6.84566e-05	0.000184009	9
ACSL1	-9.36864	5.42287e-08	2.34055e-07	6	-5.03188	0.00039	0.000949423	9
SLX4IP	-9.36829	2.64343e-22	1.99364e-21	13	-7.1943	1.50511e-17	1.03015e-16	11
PAPLN	-9.35921	1.92889e-15	1.20448e-14	4	-10.6944	3.48409e-22	2.95249e-21	5
AAGAB	-9.34895	3.70911e-27	3.92746e-26	12	-4.2891	3.4039e-05	9.48217e-05	14
ARMC6	-9.34779	6.47493e-09	2.99306e-08	5	-17.9605	4.69128e-14	2.66479e-13	6
PTPRN	-9.34627	1.20809e-31	1.40125e-30	12	-3.27405	7.56527e-05	0.000201918	12
GPRASP2	-9.34517	5.07904e-27	5.35555e-26	12	-29.9922	6.21139e-208	7.53266e-206	13
NBEAL1	-9.34091	2.25254e-09	1.07219e-08	5	-12.5731	6.57051e-12	3.28947e-11	5
SEC24B	-9.32275	4.16063e-37	5.26127e-36	19	-4.69635	2.56375e-14	1.47643e-13	20
PLD4	-9.30409	3.47031e-12	1.90424e-11	4	-8.09936	4.87158e-08	1.83176e-07	4
CFHR2	-9.26576	8.02165e-24	6.23625e-23	6	-3.27484	0.00216824	0.00480204	6
ABHD12	-9.24482	9.99037e-19	6.8487e-18	8	-7.55397	1.13654e-15	7.02453e-15	9
C12orf4	-9.22455	4.63376e-23	3.54505e-22	12	-4.25615	1.0709e-07	3.89781e-07	14
SYT7	-9.19967	8.87282e-18	5.92951e-17	16	-29.1121	1.32603e-154	9.91826e-153	14
LONRF1	-9.19319	4.33361e-29	4.73273e-28	11	-29.9229	0	0	14
TGFB3	-9.18907	1.699e-46	2.44573e-45	25	-5.10463	2.57251e-15	1.55233e-14	23
C9orf131	-9.18549	1.251e-25	1.24128e-24	28	-9.9734	4.67282e-44	9.26479e-43	25
ITGA2B	-9.17429	1.91254e-26	1.9774e-25	15	-8.86077	3.53421e-33	5.31878e-32	18
ZNF221	-9.14937	2.08562e-50	3.12719e-49	22	-11.3993	1.52142e-69	4.71566e-68	22
MPV17L2	-9.12484	6.65924e-13	3.79866e-12	4	-29.8769	2.7639e-71	8.89792e-70	5
DNHD1	-9.11559	4.52796e-13	2.60351e-12	5	-10.0267	4.40496e-15	2.63265e-14	6
TRIP12	-9.11147	0.00174432	0.00449366	3	-29.2042	1.01231e-23	9.08389e-23	3
REEP1	-9.08766	1.03649e-31	1.20637e-30	9	-3.252	3.46327e-07	1.20736e-06	11
EPC2	-9.02773	1.6703e-31	1.93292e-30	12	-12.0814	1.63637e-52	3.84208e-51	13
SPOCK1	-9.00559	2.98277e-34	3.6264e-33	12	-4.21082	1.75012e-08	6.87444e-08	11
ZNF576	-8.9965	4.70193e-28	5.05295e-27	15	-4.06828	0.000341764	0.000840515	18
FAM212A	-8.97892	2.57235e-33	3.06104e-32	19	-11.5991	7.28908e-71	2.32265e-69	19
HIC2	-8.97775	3.71506e-25	3.65031e-24	10	-3.37696	0.000334072	0.000823219	8
ATF6B	-8.97296	6.11638e-29	6.64375e-28	12	-3.79323	0.000265362	0.000661867	11
NGEF	-8.96132	4.29767e-22	3.22677e-21	8	-3.42268	0.00159838	0.0036058	7
GPR85	-8.93679	2.8916e-10	1.44594e-09	5	-16.0592	1.15166e-14	6.74104e-14	5
ZNF846	-8.90525	1.45998e-32	1.71709e-31	6	-3.10945	0.000354665	0.000869845	5
ABCC8	-8.90165	3.00671e-30	3.37119e-29	20	-3.05178	1.66265e-07	5.94395e-07	27
PPP2R5A	-8.89727	0.00221933	0.00563686	4	-7.56379	0.00231218	0.00510093	5
DCBLD2	-8.86556	4.42059e-31	5.06911e-30	25	-6.00941	6.4241e-21	5.14051e-20	26
PPIB	-8.86231	4.18461e-21	3.03572e-20	12	-29.929	0	0	12
NKAIN1	-8.85086	2.0173e-09	9.62486e-09	6	-13.2815	1.22138e-09	5.28025e-09	6
ZBED6CL	-8.84415	1.58968e-17	1.05744e-16	9	-5.20052	1.28976e-09	5.55721e-09	10
SCGB1D2	-8.81369	3.99377e-17	2.61187e-16	7	-29.9197	8.42925e-99	3.70739e-97	6
NEK4	-8.80307	0.000826979	0.00224873	4	-10.8048	0.000202505	0.000514646	4
PRPSAP2	-8.7753	1.47472e-32	1.73241e-31	20	-11.1578	8.30468e-58	2.16563e-56	20
CYP2D6	-8.76304	1.56696e-10	7.93783e-10	5	-6.05649	5.93823e-07	2.02496e-06	6
SCML1	-8.76262	1.49902e-05	5.19101e-05	5	-11.2833	5.94137e-05	0.000161089	4
HSPA6	-8.74461	5.66689e-24	4.4158e-23	7	-6.46901	5.36122e-17	3.57348e-16	8
TRIM3	-8.7095	2.81507e-17	1.85666e-16	6	-8.79218	7.50241e-20	5.77404e-19	6
SUPT20H	-8.68394	1.04109e-40	1.41586e-39	32	-3.01612	2.90823e-08	1.1174e-07	33
IMMP1L	-8.65017	8.48208e-22	6.30285e-21	10	-11.6025	1.97253e-35	3.20401e-34	10
SMG9	-8.63047	9.13566e-34	1.09748e-32	35	-10.1445	7.428e-82	2.66618e-80	39
CCL20	-8.61725	3.23316e-16	2.06493e-15	14	-4.76972	9.71621e-10	4.2317e-09	17
C15orf65	-8.61577	6.63689e-11	3.42397e-10	7	-9.54865	7.25054e-10	3.19008e-09	7
RALGAPA2	-8.61046	9.49142e-27	9.96648e-26	19	-13.2098	5.82345e-81	2.07239e-79	20
STEAP4	-8.58803	3.13605e-24	2.5076e-23	9	-14.3736	6.24512e-60	1.69952e-58	9
AGPAT2	-8.57219	4.764e-07	1.90768e-06	5	-15.8166	5.31582e-08	1.98862e-07	4
GNL1	-8.56552	4.65368e-17	3.03557e-16	12	-6.09933	4.24475e-13	2.28539e-12	12
ADAM8	-8.53605	1.58948e-21	1.16735e-20	18	-3.68649	4.73866e-07	1.63374e-06	16
CCNI2	-8.53327	9.00686e-39	1.17427e-37	22	-13.7658	1.05356e-110	5.48333e-109	22
C9orf3	-8.52432	3.41021e-07	1.3787e-06	5	-4.29345	0.000899136	0.00209029	7
ADRA1B	-8.49882	2.96066e-23	2.28061e-22	16	-9.5836	4.9897e-25	5.45287e-24	17
LGR6	-8.46377	1.46359e-24	1.23075e-23	10	-3.98131	2.33376e-07	8.24539e-07	10
INVS	-8.46059	4.25862e-40	5.73749e-39	10	-6.7519	2.02681e-21	1.66122e-20	13
RBFOX1	-8.3832	5.04973e-17	3.29178e-16	7	-4.2002	4.36197e-07	1.5072e-06	8
TAF5L	-8.35393	1.74037e-34	2.12359e-33	34	-7.48538	1.07432e-30	1.45704e-29	35
SGK223	-8.35221	4.71373e-29	5.13674e-28	23	-5.10242	3.43127e-10	1.54284e-09	22
CSNK2A2	-8.31181	4.15807e-11	2.16396e-10	5	-12.0547	2.44523e-15	1.47838e-14	4
ZNF79	-8.29504	8.81306e-19	6.05396e-18	12	-5.8539	1.33213e-13	7.40197e-13	13
USP48	-8.28188	6.36784e-12	3.44916e-11	5	-11.3467	6.23694e-19	4.57999e-18	5
TMEM232	-8.25449	5.09615e-26	5.11185e-25	19	-16.3779	3.92175e-66	1.15263e-64	19
ENAH	-8.24313	9.92905e-17	6.44335e-16	9	-6.47772	3.88258e-13	2.09582e-12	9
ZBTB48	-8.24019	1.23748e-07	5.21176e-07	4	-11.72	1.66809e-07	5.96168e-07	4
SCXB	-8.22682	1.42248e-21	1.04623e-20	20	-6.22794	6.14287e-16	3.84229e-15	21
HERC3	-8.20792	5.11201e-08	2.21301e-07	3	-6.03716	3.50395e-06	1.09584e-05	4
RPH3AL	-8.19632	1.44948e-19	1.01363e-18	4	-13.9127	1.36391e-30	1.84378e-29	5
TMEM194B	-8.16224	1.0938e-21	8.09798e-21	13	-9.34918	1.16933e-31	1.65789e-30	15
TWIST2	-8.162	3.44812e-22	2.59471e-21	17	-4.54025	1.6093e-05	4.65642e-05	16
TECRL	-8.13706	6.74456e-16	4.26972e-15	6	-13.7043	7.89961e-40	1.44683e-38	5
PRSS50	-8.1262	3.4658e-13	2.00191e-12	8	-9.14976	1.84993e-16	1.1905e-15	7
GEM	-8.08795	2.24478e-07	9.2269e-07	8	-29.8249	1.0807e-24	1.10286e-23	7
DIP2B	-8.08743	6.40052e-11	3.30372e-10	9	-5.63047	1.09968e-06	3.6416e-06	8
ZNF570	-8.08466	7.73635e-15	4.7285e-14	8	-11.4335	2.52965e-24	2.38474e-23	7
FBP1	-8.03522	3.0809e-20	2.19248e-19	7	-6.3166	5.84954e-17	3.88652e-16	6
SLC7A2	-7.97614	0.000570221	0.00158953	5	-11.0438	9.87245e-05	0.000260162	5
CYB5D1	-7.96813	2.48487e-16	1.59104e-15	7	-14.2044	7.50023e-29	9.52087e-28	6
TRIM8	-7.96723	4.46651e-10	2.21264e-09	8	-29.5603	1.92927e-58	5.12735e-57	9
C7orf34	-7.96685	1.19804e-21	8.85674e-21	23	-8.28281	8.19751e-30	1.07558e-28	25
CCDC132	-7.96143	8.65423e-37	1.08619e-35	34	-12.3873	7.5021e-85	2.81407e-83	36
ICA1	-7.94935	3.12069e-09	1.47568e-08	7	-7.12941	8.99244e-10	3.93018e-09	6
FAM122C	-7.93943	6.60988e-10	3.23788e-09	3	-5.16372	8.90427e-08	3.26263e-07	3
C4B	-7.9382	8.42959e-09	3.85773e-08	9	-3.77804	0.000360239	0.000881783	11
IMPA1	-7.9213	1.49911e-24	1.25644e-23	14	-10.1314	1.73245e-41	3.26396e-40	15
AZGP1	-7.89535	2.52782e-15	1.57264e-14	9	-3.23865	0.00118167	0.00270285	7
PDP2	-7.89374	5.99452e-21	4.34248e-20	10	-7.21736	2.01024e-23	1.77581e-22	10
BRSK2	-7.88025	1.74926e-26	1.81789e-25	21	-29.9825	0	0	20
LGR4	-7.8778	1.17058e-05	4.10579e-05	5	-7.5003	2.67697e-06	8.48465e-06	5
ERLEC1	-7.85519	2.2486e-20	1.60245e-19	10	-9.17466	1.48041e-37	2.58989e-36	9
CHD1	-7.8394	1.62174e-12	9.04145e-12	6	-10.5723	2.51912e-14	1.4514e-13	5
NOD1	-7.82458	1.13273e-29	1.25747e-28	19	-4.68442	4.26104e-11	2.01685e-10	19
IQSEC3	-7.77869	4.73011e-13	2.71356e-12	7	-3.86941	2.53298e-06	8.05077e-06	10
SPIN3	-7.74773	2.68182e-15	1.6664e-14	11	-11.459	1.75641e-34	2.77712e-33	11
CNDP2	-7.7476	5.23964e-24	4.09552e-23	11	-4.00214	2.19414e-06	7.02205e-06	11
UNC13B	-7.74575	3.03538e-08	1.33989e-07	3	-5.21463	9.68428e-05	0.000255419	4
PCDHGB5	-7.71717	1.34716e-26	1.41019e-25	15	-6.78807	1.3636e-22	1.17387e-21	17
HNRNPD	-7.71716	3.03625e-28	3.27337e-27	30	-6.94878	8.71376e-32	1.24251e-30	34
B3GALNT1	-7.69608	4.63725e-16	2.94861e-15	7	-7.74055	7.44095e-19	5.43856e-18	7
SLC25A14	-7.69434	8.22897e-12	4.42872e-11	9	-7.48909	3.16339e-09	1.3188e-08	8
ZNF384	-7.68317	8.27251e-15	5.04703e-14	7	-3.45615	9.51605e-06	2.82743e-05	11
SMYD4	-7.6748	5.33539e-21	3.86778e-20	15	-3.17402	8.96525e-05	0.000237609	14
TSEN15	-7.67474	1.16883e-18	7.99094e-18	17	-29.8235	6.35093e-165	5.05283e-163	17
C1QTNF3	-7.63914	1.79358e-09	8.58993e-09	7	-14.0208	4.68947e-18	3.27241e-17	6
MYCBP	-7.63566	1.38923e-20	9.95645e-20	16	-29.9979	0	0	15
MMP3	-7.63364	5.87034e-09	2.72106e-08	5	-6.66887	1.42538e-07	5.13393e-07	5
BRAF	-7.62841	1.43653e-07	6.01247e-07	4	-14.7438	3.93898e-07	1.36748e-06	3
EIF4A1	-7.59982	2.16412e-25	2.1389e-24	28	-8.8223	1.39353e-48	3.08081e-47	30
FBLN1	-7.59448	3.68245e-21	2.67528e-20	21	-4.41257	6.01657e-08	2.23736e-07	18
RPGRIP1	-7.59401	4.3666e-15	2.69007e-14	12	-3.36222	6.42431e-07	2.18297e-06	14
ZNF674	-7.57905	1.6047e-22	1.21752e-21	19	-7.63457	1.13804e-23	1.01828e-22	20
SPINK5	-7.57481	2.33062e-24	1.89663e-23	10	-4.23718	2.60922e-08	1.00648e-07	10
LPCAT4	-7.5659	4.03955e-20	2.86862e-19	6	-5.92746	4.61794e-13	2.47672e-12	6
BROX	-7.55778	2.95553e-11	1.5469e-10	7	-7.1748	1.28507e-10	5.91445e-10	7
NTM	-7.5016	2.68972e-05	9.07455e-05	8	-5.94583	0.000104984	0.000275785	9
R3HDM2	-7.48472	1.0511e-29	1.16813e-28	24	-6.02176	1.43589e-22	1.23524e-21	25
AP2B1	-7.47734	3.59161e-18	2.43075e-17	9	-3.54417	1.37896e-06	4.51143e-06	12
CASP3	-7.44134	4.54906e-12	2.47865e-11	8	-4.91499	2.62227e-07	9.21111e-07	10
POC1B	-7.43584	1.03808e-11	5.55719e-11	4	-4.8485	3.94254e-07	1.36833e-06	6
SENP7	-7.40144	2.74229e-07	1.11853e-06	5	-11.5056	1.19728e-13	6.67347e-13	4
TBC1D4	-7.39126	6.50927e-06	2.34841e-05	4	-14.8253	3.83563e-11	1.82032e-10	3
SEPTIN9	-7.38742	1.41834e-21	1.04395e-20	11	-6.51207	6.00449e-19	4.41708e-18	12
RABGEF1	-7.38575	6.19699e-22	4.639e-21	27	-6.77912	1.65825e-23	1.47425e-22	31
SP100	-7.38533	2.46866e-23	1.90453e-22	26	-5.32438	6.31491e-15	3.73659e-14	29
H1FX	-7.3696	7.63483e-16	4.82122e-15	7	-8.68774	8.98783e-18	6.20946e-17	7
TBKBP1	-7.3657	3.01748e-27	3.2052e-26	8	-4.43367	3.94403e-09	1.63399e-08	6
MAPRE2	-7.35309	2.14211e-18	1.4566e-17	8	-3.82358	3.36978e-05	9.39508e-05	7
TMEM128	-7.34837	4.65329e-12	2.5327e-11	8	-6.63981	8.32294e-09	3.34821e-08	10
TRIM7	-7.33844	4.13576e-06	1.52314e-05	5	-5.67544	8.79412e-06	2.61791e-05	5
UBE2O	-7.3249	3.94209e-05	0.000131113	4	-5.36057	0.00346877	0.00745756	5
NKIRAS1	-7.29448	3.15725e-21	2.29869e-20	21	-10.4629	1.59473e-48	3.5132e-47	22
INPP5A	-7.29311	2.80703e-23	2.16392e-22	22	-4.73314	8.78483e-14	4.9251e-13	20
TRDMT1	-7.28815	2.67952e-34	3.26165e-33	15	-13.6129	2.03688e-95	8.56656e-94	16
AMPD1	-7.28795	2.03519e-11	1.07355e-10	7	-3.67863	2.1291e-05	6.06489e-05	6
APOE	-7.24308	3.20998e-07	1.30036e-06	6	-5.24566	0.000110225	0.000288885	10
NRK	-7.21959	2.39626e-19	1.66533e-18	12	-3.33031	2.57715e-05	7.27979e-05	14
CREBBP	-7.20924	3.03054e-23	2.33088e-22	25	-9.69083	5.04194e-43	9.80979e-42	23
MAGT1	-7.19626	2.34193e-05	7.93832e-05	6	-4.41025	0.000457421	0.00110345	8
PIPOX	-7.16808	4.91628e-20	3.47654e-19	18	-3.15805	2.81936e-07	9.87566e-07	24
SENP3	-7.16644	1.04321e-22	7.94492e-22	21	-12.0891	3.34003e-61	9.27119e-60	22
TDRD12	-7.15285	4.27893e-07	1.71821e-06	12	-17.2149	3.18261e-09	1.32524e-08	10
CHCHD6	-7.15112	1.22188e-18	8.348e-18	13	-4.16272	0.000169734	0.000434903	14
TMEM185B	-7.1299	1.32865e-13	7.76793e-13	20	-8.89605	1.16371e-22	1.00386e-21	19
LHFPL2	-7.12431	3.40115e-07	1.37559e-06	7	-7.73671	5.43976e-07	1.86415e-06	8
CLDN5	-7.09752	9.28319e-07	3.61966e-06	3	-7.19363	2.3406e-06	7.46589e-06	3
GCSAM	-7.07715	2.66738e-18	1.81012e-17	8	-5.61622	4.61971e-17	3.09078e-16	7
PAN2	-7.05491	4.71572e-22	3.53539e-21	29	-5.86752	6.95363e-27	8.15566e-26	29
AP1G1	-7.05284	3.05166e-21	2.22341e-20	12	-3.14741	3.5725e-06	1.11601e-05	10
KIAA0513	-7.04495	5.68358e-18	3.8159e-17	14	-4.06216	1.99361e-05	5.69973e-05	15
S100A6	-6.95567	1.44314e-11	7.67265e-11	8	-6.76227	5.98753e-13	3.18528e-12	6
APOBEC3D	-6.94061	2.02291e-12	1.12222e-11	10	-14.2389	4.97747e-29	6.35073e-28	7
TRPM6	-6.94034	1.19244e-15	7.48313e-15	8	-4.10021	1.99437e-08	7.78976e-08	9
MARCH7	-6.90334	1.09935e-10	5.60281e-10	9	-29.7003	1.26265e-100	5.77722e-99	7
MITF	-6.88832	1.36033e-13	7.94853e-13	11	-4.31319	8.38452e-08	3.07942e-07	12
PDCL	-6.86717	1.11005e-21	8.21223e-21	27	-7.5114	7.33574e-37	1.26039e-35	31
TADA2B	-6.84911	1.91301e-24	1.57714e-23	16	-5.72386	1.12976e-16	7.38842e-16	16
CXorf65	-6.83072	1.99313e-16	1.27943e-15	24	-9.92482	6.41775e-49	1.42135e-47	29
BLVRA	-6.80716	1.65332e-12	9.20224e-12	11	-8.76596	3.17408e-18	2.23366e-17	9
EFHC1	-6.79833	4.00068e-12	2.18576e-11	8	-3.64292	1.79677e-05	5.17012e-05	9
PXK	-6.79743	1.23964e-08	5.59948e-08	10	-4.77409	1.06068e-06	3.51993e-06	9
UCN	-6.78685	3.55892e-15	2.20326e-14	8	-6.59938	2.43175e-16	1.55689e-15	9
RPL36A	-6.78628	1.54133e-15	9.64263e-15	23	-7.4743	4.44635e-26	5.03987e-25	24
SPAG16	-6.74844	2.42276e-15	1.50866e-14	25	-15.4507	1.38079e-131	8.37256e-130	26
SSC5D	-6.73259	3.88155e-07	1.56487e-06	3	-5.8667	6.65563e-07	2.25605e-06	4
ABCB9	-6.72217	3.26812e-08	1.43823e-07	6	-9.24719	5.98672e-08	2.22692e-07	7
SMAD9	-6.71668	5.42807e-18	3.64678e-17	15	-7.74562	3.5641e-27	4.23992e-26	15
ZCCHC11	-6.7093	2.17638e-17	1.44012e-16	20	-29.9978	0	0	21
CD244	-6.67982	2.24753e-17	1.48525e-16	22	-11.0462	3.51893e-54	8.65255e-53	27
HDAC4	-6.65819	6.62776e-19	4.56524e-18	21	-6.68696	3.14205e-26	3.59079e-25	24
KLHL12	-6.64897	1.8361e-14	1.1088e-13	12	-5.19619	2.71972e-12	1.39002e-11	17
C15orf38-AP3S2	-6.64884	5.53804e-07	2.20277e-06	9	-4.43678	0.000202605	0.000514796	9
KRT35	-6.64773	1.57832e-19	1.10296e-18	20	-4.37303	6.02426e-13	3.20209e-12	20
UBE2L6	-6.6261	7.55429e-08	3.2301e-07	4	-5.6436	4.3044e-06	1.33316e-05	6
ZNF319	-6.60099	1.40909e-14	8.52976e-14	19	-5.59992	1.78348e-29	2.30854e-28	20
SLC9A3	-6.59853	4.69106e-08	2.0369e-07	8	-9.66929	4.56513e-09	1.87638e-08	7
TCF7L2	-6.58565	1.53586e-20	1.09995e-19	30	-5.687	1.1106e-23	9.94446e-23	30
CLEC4D	-6.58508	4.80553e-15	2.95146e-14	14	-6.76994	1.04501e-15	6.478e-15	16
CASP4	-6.56896	1.46729e-16	9.47911e-16	18	-11.9928	2.04715e-79	7.10303e-78	23
ITGAV	-6.56425	3.87959e-24	3.0657e-23	25	-8.4939	9.185e-54	2.2321e-52	25
SLC39A5	-6.5424	6.95614e-12	3.75171e-11	5	-3.09696	1.50717e-05	4.37511e-05	10
C1orf110	-6.5123	4.0555e-07	1.63174e-06	5	-6.07436	1.44281e-06	4.70307e-06	4
C11orf45	-6.50048	2.37228e-11	1.24746e-10	13	-8.39308	1.33427e-18	9.59665e-18	13
PPP2R3A	-6.48193	1.64907e-08	7.39261e-08	5	-6.43317	3.18488e-08	1.21696e-07	7
S100A3	-6.47973	7.31029e-22	5.45623e-21	20	-29.997	0	0	18
YWHAB	-6.4687	2.85863e-11	1.49774e-10	11	-10.0601	5.9179e-19	4.35595e-18	11
ZNF438	-6.46479	1.73745e-16	1.11815e-15	13	-5.01329	4.09486e-12	2.07164e-11	15
SAMD8	-6.45678	1.05517e-15	6.62581e-15	14	-3.81682	4.65546e-05	0.000127637	13
BRWD1	-6.45655	1.67142e-18	1.13808e-17	17	-14.2427	1.85402e-75	6.20872e-74	19
CETP	-6.44278	2.97013e-17	1.95637e-16	21	-4.14297	8.74643e-10	3.82668e-09	14
SERTAD3	-6.43937	3.11435e-13	1.802e-12	20	-5.08165	1.67581e-14	9.73154e-14	25
CDC25A	-6.42315	2.36679e-19	1.64712e-18	13	-5.1079	1.63676e-12	8.44476e-12	11
AP4B1	-6.40684	6.77776e-13	3.86409e-12	9	-8.30045	1.2246e-18	8.84193e-18	7
CSDE1	-6.40336	3.63202e-14	2.16997e-13	6	-29.9334	1.07429e-200	1.19812e-198	8
USP28	-6.39303	1.05636e-19	7.41807e-19	13	-5.64075	1.50741e-14	8.7822e-14	14
RAVER1	-6.38455	1.11329e-18	7.62158e-18	16	-12.2463	4.66623e-59	1.25077e-57	15
UBXN6	-6.38025	1.13302e-13	6.63953e-13	14	-4.24742	1.32443e-08	5.25857e-08	18
CUL4A	-6.35651	4.57447e-13	2.62726e-12	23	-6.08605	1.16628e-13	6.5065e-13	26
ARNTL2	-6.35167	4.13963e-16	2.63386e-15	9	-6.58236	7.87426e-17	5.20134e-16	10
MIEF2	-6.33536	2.06378e-13	1.2024e-12	21	-7.97798	1.85846e-32	2.70559e-31	26
RNF17	-6.33198	1.00866e-13	5.92112e-13	7	-6.53814	3.97143e-14	2.26724e-13	8
PPP4R1	-6.32887	5.88343e-16	3.73159e-15	16	-13.1426	1.47141e-53	3.5619e-52	14
IRF9	-6.31194	9.37251e-16	5.90006e-15	20	-14.5441	4.21524e-61	1.16746e-59	21
CYP1B1	-6.3099	1.468e-10	7.44027e-10	5	-25.5211	6.45699e-60	1.75335e-58	4
CARD8	-6.30447	7.00664e-17	4.54981e-16	21	-5.09197	6.68451e-13	3.5305e-12	21
CSNK1A1L	-6.30087	2.27358e-23	1.75537e-22	16	-3.89426	3.22595e-06	1.01321e-05	14
ELOVL7	-6.29894	1.75826e-15	1.0993e-14	7	-8.43461	7.90999e-26	8.90926e-25	8
CAB39L	-6.29451	6.92731e-13	3.93822e-12	18	-9.02505	4.53486e-49	1.00971e-47	23
RHBDL2	-6.28867	7.32735e-19	5.04024e-18	14	-5.36509	1.07255e-13	5.99428e-13	16
C4A	-6.25215	2.97914e-07	1.21269e-06	6	-4.9075	7.45615e-06	2.24207e-05	9
DZIP3	-6.24958	2.1609e-11	1.13749e-10	5	-8.05253	5.37649e-19	3.96445e-18	6
SFXN2	-6.243	5.69027e-13	3.25513e-12	15	-11.8935	8.53325e-48	1.8441e-46	15
STK36	-6.21223	3.36327e-17	2.20812e-16	16	-5.38095	6.46314e-13	3.41646e-12	17
TRIM62	-6.21155	9.2953e-11	4.75412e-10	7	-29.828	8.78482e-114	4.66941e-112	4
A4GALT	-6.20814	6.03815e-05	0.000195417	7	-7.77202	2.95761e-06	9.32209e-06	5
PPDPF	-6.20601	2.74374e-25	2.70646e-24	20	-5.30976	7.28618e-22	6.12461e-21	21
ECHDC2	-6.17264	2.41544e-16	1.54757e-15	18	-11.9225	3.44687e-82	1.24436e-80	19
CACFD1	-6.14635	1.74757e-08	7.82026e-08	6	-29.6825	1.01826e-69	3.18774e-68	4
ARNT2	-6.11976	6.53677e-07	2.58373e-06	5	-6.6216	0.000127486	0.000332239	6
PRKCI	-6.08005	2.98364e-15	1.84938e-14	17	-13.202	2.28815e-110	1.18594e-108	19
DEXI	-6.07921	1.8087e-06	6.877e-06	3	-3.68606	0.000483819	0.00116376	6
KDM6A	-6.06399	8.46253e-18	5.66658e-17	15	-5.34962	5.4253e-15	3.22702e-14	16
PDGFRB	-6.05877	1.06719e-13	6.26105e-13	18	-5.02781	1.55006e-14	9.02228e-14	19
DTX2	-6.04841	3.34426e-09	1.57917e-08	4	-8.26913	1.26302e-10	5.81726e-10	4
PDLIM5	-6.04613	7.60582e-11	3.90587e-10	19	-9.36605	5.40804e-36	8.99492e-35	24
TCAIM	-6.04596	2.659e-14	1.5924e-13	3	-6.07869	6.97549e-13	3.67486e-12	6
SLC35D1	-6.04495	4.85601e-12	2.64019e-11	15	-12.1644	2.52685e-78	8.71902e-77	19
TRIM39-RPP21	-6.04001	6.56865e-12	3.54841e-11	20	-10.8093	9.108e-48	1.96152e-46	22
VRK3	-6.03727	5.7979e-19	3.99908e-18	12	-5.18484	6.06574e-17	4.02803e-16	13
RBMXL1	-6.01484	1.93322e-05	6.60844e-05	6	-15.5982	3.35401e-09	1.39417e-08	7
RFX7	-6.01461	3.71208e-14	2.2147e-13	18	-7.59342	8.52665e-46	1.76044e-44	21
RASGEF1B	-6.00119	1.11189e-17	7.41579e-17	24	-7.31154	7.58944e-31	1.04176e-29	26
ADAM18	-6.00025	6.09268e-20	4.29939e-19	14	-10.9106	7.82988e-82	2.80238e-80	17
TNFRSF10A	-5.9909	4.09821e-16	2.60915e-15	18	-10.4678	1.53299e-45	3.15462e-44	20
CLK1	-5.98567	6.7261e-28	7.20521e-27	19	-29.923	0	0	20
DACT2	-5.9798	8.05359e-09	3.70076e-08	22	-4.42155	1.60762e-12	8.30126e-12	24
RUNDC3B	-5.96724	5.46783e-16	3.47236e-15	14	-4.00662	1.76552e-06	5.70733e-06	13
SCARB2	-5.95672	2.29714e-10	1.15383e-09	11	-4.89452	3.48123e-08	1.32493e-07	10
TMEM63C	-5.94622	2.17948e-14	1.30911e-13	17	-9.15892	6.84694e-55	1.71393e-53	18
TGFBR2	-5.94471	2.03415e-17	1.34689e-16	19	-5.02386	1.50099e-16	9.71447e-16	20
FGF5	-5.92901	3.91789e-15	2.42103e-14	7	-5.03082	3.60793e-13	1.95178e-12	9
GYS1	-5.91944	1.06579e-26	1.11798e-25	17	-5.48013	7.69743e-13	4.03816e-12	20
HINT2	-5.91881	9.16298e-13	5.17424e-12	19	-10.8905	1.76241e-57	4.55783e-56	24
PCDHGA11	-5.91646	1.30205e-13	7.6168e-13	13	-6.484	7.42001e-22	6.2329e-21	19
CD74	-5.904	1.00543e-13	5.90557e-13	18	-14.9702	4.5068e-99	1.99626e-97	19
WISP2	-5.89975	1.02951e-10	5.25218e-10	19	-29.9641	0	0	18
CCDC97	-5.89947	9.07869e-07	3.54814e-06	9	-4.94416	6.12671e-06	1.86111e-05	10
MEA1	-5.88385	4.53994e-13	2.60892e-12	17	-4.77522	2.40996e-13	1.31972e-12	22
TRIM39	-5.88124	5.95134e-16	3.77229e-15	20	-11.1058	4.18937e-49	9.34453e-48	22
TFDP1	-5.86093	5.4615e-14	3.23237e-13	12	-8.74869	2.62722e-30	3.51356e-29	11
REEP5	-5.86003	6.84098e-10	3.34621e-09	21	-5.01756	1.49555e-08	5.91168e-08	21
ZNF114	-5.83768	3.65193e-12	2.00281e-11	20	-5.59986	1.28122e-13	7.12859e-13	23
CHN1	-5.83588	2.97805e-26	3.06023e-25	17	-5.17165	6.58292e-11	3.08198e-10	19
MARCKS	-5.83225	6.91504e-13	3.93346e-12	17	-5.26215	3.83719e-13	2.07222e-12	20
MB	-5.79383	5.70897e-12	3.09727e-11	10	-14.8854	3.34961e-44	6.68371e-43	11
CSK	-5.7849	2.04161e-14	1.22763e-13	13	-9.53181	9.44339e-64	2.73683e-62	14
CCR6	-5.78339	6.46035e-12	3.49552e-11	10	-5.64563	5.5672e-13	2.97052e-12	10
SLC9C1	-5.78313	1.63016e-14	9.85024e-14	14	-3.69195	2.99906e-07	1.04934e-06	15
TTC8	-5.78312	5.74944e-06	2.08622e-05	6	-4.18741	0.000265218	0.000661642	7
ZNF563	-5.77237	7.70061e-11	3.95253e-10	11	-4.73908	3.99846e-09	1.6549e-08	13
ZNF283	-5.75345	3.59398e-18	2.43075e-17	15	-10.5371	2.58279e-78	8.8875e-77	18
RTEL1	-5.74601	0.000363044	0.00104581	3	-6.83242	0.00257525	0.00563549	3
PARD3	-5.74276	5.69143e-14	3.36451e-13	11	-4.77128	4.90321e-13	2.62295e-12	12
ATN1	-5.74238	1.24624e-11	6.63981e-11	11	-4.46379	5.79689e-08	2.15953e-07	10
RAB13	-5.741	2.66651e-14	1.59595e-13	15	-4.98234	4.74352e-12	2.39206e-11	16
CNOT11	-5.74004	3.10365e-11	1.62106e-10	18	-7.90811	6.68958e-27	7.86072e-26	19
TMEM59	-5.73375	2.38884e-09	1.13546e-08	11	-12.5878	6.88632e-21	5.49981e-20	8
KIAA1614	-5.73291	0.000136379	0.000419956	7	-11.9032	4.20305e-05	0.000115869	5
GIPC1	-5.7297	5.2632e-10	2.59457e-09	17	-5.15912	1.05929e-09	4.60229e-09	19
SLC25A4	-5.72804	2.25759e-10	1.13509e-09	11	-9.41332	4.22279e-48	9.22148e-47	14
PTPN20B	-5.72733	5.31577e-17	3.46297e-16	20	-7.59829	5.83719e-31	8.06552e-30	23
FAT2	-5.72573	2.9806e-11	1.55921e-10	16	-10.6485	5.85726e-61	1.61865e-59	18
AEBP2	-5.72275	9.15034e-15	5.57585e-14	8	-4.7871	1.84603e-11	8.95484e-11	13
ME1	-5.72055	6.44214e-12	3.48754e-11	16	-8.0844	2.46324e-34	3.85569e-33	18
PREX2	-5.70874	4.44435e-09	2.08015e-08	16	-9.57662	1.74364e-49	3.93848e-48	17
PCDHGB1	-5.70437	2.90489e-13	1.68274e-12	13	-4.96779	4.267e-14	2.43153e-13	18
GNPAT	-5.70215	1.23321e-11	6.57733e-11	8	-5.8833	2.3598e-11	1.13458e-10	7
SCRG1	-5.70074	2.55096e-07	1.04302e-06	16	-4.70726	9.36764e-08	3.4284e-07	18
CRB3	-5.6993	7.15503e-09	3.29536e-08	15	-9.63648	1.1223e-38	2.0084e-37	17
COLEC12	-5.69846	1.48823e-12	8.31549e-12	9	-4.71472	3.16423e-09	1.3188e-08	11
HNF4G	-5.69092	9.00728e-10	4.37614e-09	18	-5.37285	6.62989e-11	3.10281e-10	20
TMEM19	-5.68887	5.36317e-13	3.07498e-12	8	-3.59689	6.04492e-05	0.000163648	7
CLDN12	-5.68403	2.97082e-08	1.31312e-07	14	-16.6664	3.69266e-205	4.39286e-203	16
CSGALNACT1	-5.67911	4.09722e-15	2.52875e-14	14	-5.65588	1.978e-16	1.27095e-15	18
HSD17B14	-5.66982	2.05412e-09	9.79127e-09	16	-9.13531	9.30563e-31	1.26758e-29	18
GPR39	-5.6662	6.53519e-06	2.35608e-05	6	-7.71189	7.95131e-09	3.2018e-08	6
ZNF566	-5.6569	1.65804e-13	9.67687e-13	26	-5.54446	7.27013e-16	4.54056e-15	28
ACTR3C	-5.65106	2.12169e-12	1.17637e-11	5	-8.90421	4.83118e-24	4.42746e-23	5
ACOX3	-5.65063	3.34985e-10	1.6726e-09	19	-4.90856	2.54958e-08	9.8414e-08	20
JAK1	-5.64978	3.081e-18	2.0866e-17	24	-7.81425	6.8912e-37	1.18565e-35	26
FAIM3	-5.64806	2.46338e-11	1.29468e-10	4	-10.3673	9.40861e-32	1.34006e-30	3
PXMP2	-5.64758	1.4278e-10	7.24382e-10	15	-14.839	4.2734e-102	1.99176e-100	17
GLP1R	-5.64406	0.00093493	0.00251115	4	-3.51721	0.00184324	0.00412467	5
BHLHB9	-5.64302	1.08459e-12	6.10065e-12	9	-5.24294	1.81611e-13	1.00022e-12	14
LRRC8D	-5.6427	2.65578e-10	1.33066e-09	20	-7.13544	1.4857e-21	1.22656e-20	23
ZNF235	-5.6331	2.90055e-08	1.28375e-07	6	-29.777	9.1367e-103	4.33941e-101	5
CSTF2	-5.61507	8.31381e-09	3.81166e-08	9	-4.73011	5.84575e-07	1.99506e-06	10
RAB42	-5.61491	1.77414e-07	7.36138e-07	21	-4.23817	4.88898e-08	1.83719e-07	21
KLHL38	-5.61167	1.17456e-08	5.3198e-08	16	-7.83883	5.35273e-29	6.8156e-28	21
FARP1	-5.59773	1.45297e-09	6.99518e-09	19	-5.29429	2.59842e-09	1.09172e-08	22
LIMCH1	-5.59414	3.62309e-11	1.89041e-10	7	-4.44424	4.54452e-09	1.86852e-08	8
RMND5A	-5.5848	1.73954e-08	7.78778e-08	7	-4.4793	1.61734e-07	5.7919e-07	8
PIK3R4	-5.58319	3.21512e-10	1.60613e-09	13	-4.82412	2.08035e-09	8.80275e-09	14
ZNF565	-5.58311	2.23306e-08	9.93116e-08	13	-4.49317	1.79609e-05	5.16934e-05	14
LRP3	-5.58303	0.000774436	0.00211326	6	-3.57292	0.00451845	0.00953538	6
IRX5	-5.57995	2.92078e-12	1.6097e-11	11	-4.41316	1.74544e-10	7.97448e-10	11
ITGB5	-5.577	9.20949e-13	5.19759e-12	13	-7.24578	5.50686e-29	6.99758e-28	14
C19orf66	-5.57618	3.52838e-11	1.84195e-10	11	-7.40416	5.11454e-24	4.68027e-23	13
TRAPPC6B	-5.56796	2.14663e-11	1.13056e-10	8	-3.18717	0.000933712	0.00216704	6
ZNF100	-5.56608	5.43127e-11	2.81206e-10	20	-6.53219	7.1383e-23	6.19198e-22	24
ARHGEF10L	-5.56471	4.10086e-11	2.13528e-10	10	-4.91479	6.17824e-13	3.27835e-12	12
PCDHGA9	-5.54353	4.12838e-15	2.54642e-14	11	-5.99623	1.68971e-20	1.32994e-19	17
HEATR5B	-5.5294	5.01171e-14	2.97315e-13	12	-9.68195	5.10543e-49	1.13272e-47	15
FDFT1	-5.52028	3.77396e-12	2.06636e-11	21	-5.20225	9.94438e-10	4.32957e-09	22
BCAR3	-5.51925	2.22495e-08	9.90819e-08	17	-4.59186	1.47371e-06	4.79502e-06	19
DCLK1	-5.51378	2.38757e-17	1.57677e-16	11	-3.96242	5.95466e-08	2.21613e-07	9
AP5Z1	-5.50572	5.47979e-14	3.2413e-13	21	-16.0259	1.46829e-95	6.1961e-94	20
LDHA	-5.50104	2.77653e-09	1.3154e-08	15	-5.01303	4.27743e-09	1.76509e-08	17
AK9	-5.4976	5.12658e-09	2.38838e-08	13	-5.15961	5.59804e-10	2.48844e-09	14
ZNF443	-5.49572	2.97978e-08	1.3165e-07	6	-11.7418	3.4816e-13	1.88589e-12	5
YTHDF3	-5.48794	1.08888e-08	4.94727e-08	14	-4.53934	3.68548e-08	1.40053e-07	11
ACP1	-5.48725	1.14745e-07	4.84676e-07	14	-10.2176	3.77564e-16	2.39035e-15	12
RANBP6	-5.48426	9.56008e-13	5.39244e-12	15	-4.53375	9.9915e-10	4.34705e-09	17
STRC	-5.47051	2.05769e-07	8.48557e-07	16	-3.67839	9.27923e-05	0.000245202	16
RFX8	-5.4687	1.89203e-06	7.17493e-06	4	-9.97572	6.68668e-14	3.7708e-13	4
SLC29A1	-5.46289	9.06539e-09	4.13744e-08	19	-8.47436	7.67646e-33	1.14015e-31	20
SNX19	-5.46132	3.78403e-12	2.07075e-11	9	-3.21547	5.72165e-06	1.74613e-05	11
TMEM41A	-5.45978	2.30217e-07	9.45126e-07	11	-4.55887	5.83639e-11	2.73863e-10	14
CNTN3	-5.45881	6.12967e-14	3.61934e-13	9	-4.90589	2.71321e-14	1.56178e-13	10
TOB1	-5.45675	2.94491e-15	1.82649e-14	19	-8.69401	7.44487e-35	1.18766e-33	19
PCDHA8	-5.45631	3.61511e-13	2.08696e-12	15	-6.38696	1.2528e-21	1.0391e-20	20
KLF16	-5.45453	3.30394e-07	1.33788e-06	8	-11.2067	6.49768e-16	4.06015e-15	5
G2E3	-5.44988	1.04228e-12	5.87253e-12	10	-4.76275	4.59814e-10	2.05346e-09	11
NME2	-5.44662	3.71759e-06	1.37415e-05	22	-3.34794	4.55306e-05	0.000124966	21
RNF24	-5.44619	6.91005e-13	3.93284e-12	13	-12.9154	9.90852e-67	2.93984e-65	15
IQCD	-5.44163	3.58891e-08	1.57459e-07	19	-4.47454	1.77567e-06	5.73569e-06	20
GNPDA1	-5.43703	1.84376e-13	1.07546e-12	15	-4.91293	5.59913e-11	2.63126e-10	16
RXFP1	-5.435	5.12494e-08	2.21766e-07	13	-4.39851	8.34382e-07	2.80244e-06	14
KIF27	-5.42266	4.74425e-10	2.34447e-09	11	-4.66264	3.88648e-10	1.7425e-09	12
LRP11	-5.42194	1.29204e-06	4.98202e-06	6	-10.4845	1.35192e-12	7.00118e-12	6
MOV10	-5.41251	0.000515804	0.00144784	5	-6.56602	0.00145048	0.00328046	4
IFIT5	-5.40751	1.18042e-10	6.00689e-10	9	-4.71132	4.9596e-09	2.03316e-08	10
BNC1	-5.40536	5.13283e-11	2.66027e-10	18	-4.45286	4.34434e-09	1.78975e-08	18
PANX1	-5.40256	2.84363e-18	1.92714e-17	15	-29.8945	0	0	15
HOXA3	-5.40172	3.80702e-08	1.66667e-07	15	-11.2665	4.4063e-48	9.60543e-47	17
TYK2	-5.40087	4.05419e-08	1.77027e-07	20	-5.77942	2.70786e-16	1.73012e-15	28
C2orf47	-5.39986	1.74535e-07	7.25085e-07	17	-4.5759	4.94242e-06	1.52134e-05	18
PPAT	-5.39933	8.31129e-13	4.70119e-12	20	-4.68902	1.6974e-09	7.23627e-09	22
NFIB	-5.39713	1.21389e-14	7.37028e-14	14	-5.19993	7.68047e-13	4.03096e-12	15
PAK6	-5.38825	1.20995e-08	5.46781e-08	16	-10.1333	2.36404e-38	4.18853e-37	19
ARMC9	-5.38357	5.89674e-13	3.37133e-12	12	-8.3191	5.9717e-33	8.90125e-32	12
RABIF	-5.37799	8.71875e-09	3.98645e-08	17	-5.2915	2.73449e-10	1.23711e-09	21
ZNF611	-5.37462	9.49452e-09	4.32547e-08	14	-4.72379	2.21312e-08	8.60382e-08	16
SMIM1	-5.37276	3.33342e-12	1.83311e-11	12	-4.1665	2.76364e-08	1.06381e-07	14
RNF152	-5.37196	3.77877e-08	1.65502e-07	18	-4.18561	4.30457e-07	1.4886e-06	20
ZBTB6	-5.36127	3.52501e-09	1.66219e-08	11	-4.6585	7.38963e-08	2.72927e-07	12
ELF3	-5.35903	1.95055e-07	8.05688e-07	13	-9.04145	1.29008e-29	1.67857e-28	14
CNTROB	-5.3512	2.47592e-11	1.3006e-10	8	-4.15432	1.29721e-08	5.1554e-08	9
MESP2	-5.34939	6.08046e-10	2.98869e-09	10	-5.65142	6.87294e-18	4.76944e-17	14
GATSL2	-5.34651	3.16575e-08	1.395e-07	18	-9.31514	1.70778e-31	2.40225e-30	20
TBCEL	-5.33693	5.72454e-11	2.96086e-10	13	-4.76616	2.03007e-11	9.80194e-11	15
MPP4	-5.33123	1.88127e-06	7.13682e-06	16	-4.53517	1.45967e-05	4.24314e-05	18
CDC37L1	-5.32756	8.62237e-12	4.6355e-11	12	-4.75488	2.97369e-11	1.42207e-10	13
TATDN3	-5.32681	2.02443e-09	9.65431e-09	11	-4.51868	2.01023e-08	7.84679e-08	12
CTF1	-5.32484	3.03415e-11	1.5864e-10	10	-3.63035	1.47332e-06	4.795e-06	11
SLC25A24	-5.31729	6.3078e-10	3.09592e-09	8	-4.49663	2.34865e-17	1.59008e-16	9
CA8	-5.31402	1.38237e-12	7.74113e-12	7	-4.64714	1.79748e-11	8.73633e-11	9
CNNM3	-5.314	4.7538e-06	1.74122e-05	14	-14.9215	3.33695e-54	8.22128e-53	17
UNKL	-5.30614	4.39818e-09	2.05949e-08	12	-10.2618	5.70285e-47	1.20736e-45	14
C17orf99	-5.3042	4.84039e-05	0.000158689	17	-7.65129	1.87172e-22	1.59915e-21	19
S100A1	-5.30385	2.08237e-10	1.04909e-09	7	-6.13713	3.99473e-13	2.1545e-12	6
RRAGD	-5.30017	1.23479e-07	5.20263e-07	18	-3.41169	4.042e-07	1.40129e-06	19
PCDHGA12	-5.29028	1.17947e-08	5.33721e-08	11	-6.34833	1.23892e-18	8.94009e-18	18
GRM8	-5.28385	2.66502e-11	1.39775e-10	9	-4.40482	7.60937e-10	3.34443e-09	10
DHX30	-5.28129	2.98093e-07	1.21292e-06	8	-5.40902	5.47758e-08	2.04668e-07	7
CRABP2	-5.27945	2.22531e-13	1.29502e-12	13	-4.81319	8.43919e-07	2.83219e-06	17
ADRA1A	-5.27247	1.26466e-08	5.70225e-08	17	-4.85676	1.1225e-08	4.48676e-08	19
OR13C5	-5.27146	8.69869e-06	3.10171e-05	18	-5.00511	1.60113e-06	5.20013e-06	22
BRINP3	-5.26857	3.36049e-08	1.47759e-07	18	-4.65931	2.21738e-07	7.85072e-07	21
ATP9B	-5.26386	2.76807e-08	1.22781e-07	11	-4.46348	1.77017e-06	5.71947e-06	11
GMPR	-5.25656	3.80049e-07	1.53281e-06	13	-4.3174	6.82805e-08	2.53159e-07	15
PCDHGA1	-5.25596	4.94678e-09	2.30781e-08	10	-6.06311	7.60202e-17	5.02417e-16	15
STAT6	-5.2551	6.3666e-09	2.94568e-08	9	-10.4852	1.22159e-29	1.59279e-28	8
PCDHA6	-5.25311	1.21235e-14	7.36533e-14	13	-5.58173	4.45598e-17	2.98283e-16	19
ZNF326	-5.24522	2.59652e-11	1.36253e-10	10	-6.61259	7.32296e-19	5.35545e-18	11
BCKDK	-5.24425	1.09344e-09	5.28696e-09	14	-4.87602	1.88196e-09	7.99034e-09	18
SLC2A6	-5.23694	1.59654e-09	7.67174e-09	17	-19.351	7.99607e-121	4.51941e-119	22
ENKUR	-5.23279	6.51148e-08	2.79844e-07	10	-4.51062	1.00097e-07	3.65266e-07	13
FOXR1	-5.23167	5.47654e-13	3.13642e-12	13	-4.22496	7.89382e-09	3.17967e-08	11
MAB21L3	-5.22885	0.000100867	0.000317681	5	-8.18652	4.59436e-06	1.41804e-05	3
ELMO3	-5.22787	3.96516e-08	1.73214e-07	10	-3.99606	2.2411e-05	6.37232e-05	10
MON1B	-5.2222	5.78873e-11	2.99253e-10	8	-3.54338	2.52794e-08	9.76088e-08	12
EIF4A2	-5.21982	7.0294e-08	3.01077e-07	12	-4.58323	1.46517e-08	5.79893e-08	14
IL27RA	-5.21577	4.1075e-08	1.79199e-07	9	-4.97288	1.2599e-11	6.19337e-11	11
CWC27	-5.21027	0.000245731	0.000725263	6	-29.6903	1.78478e-24	1.71358e-23	3
PDK2	-5.201	2.59784e-10	1.30293e-09	19	-4.5359	4.47078e-09	1.83881e-08	19
BRDT	-5.19832	3.32058e-07	1.34408e-06	13	-4.78548	5.07918e-07	1.74585e-06	15
FHOD1	-5.19759	1.17741e-08	5.33029e-08	13	-4.68718	1.51916e-09	6.50749e-09	14
MAP3K14	-5.19708	3.40572e-09	1.60669e-08	10	-9.22208	5.47347e-23	4.77979e-22	9
LYL1	-5.19019	2.60649e-10	1.30661e-09	11	-4.12645	3.73738e-06	1.16505e-05	11
PCDHGB2	-5.18435	2.57222e-09	1.22032e-08	10	-6.181	3.84551e-17	2.58249e-16	17
GRB7	-5.18103	6.98576e-11	3.60027e-10	6	-4.3825	3.62969e-09	1.50576e-08	6
PCDHA9	-5.17947	6.15548e-12	3.33772e-11	13	-6.62565	4.09211e-18	2.86195e-17	19
VPS53	-5.177	1.83457e-11	9.70265e-11	8	-9.94943	7.13014e-71	2.27782e-69	9
HOMER1	-5.17102	3.01879e-12	1.6619e-11	8	-5.89813	1.27969e-19	9.70529e-19	9
HSPA4	-5.1633	4.18548e-07	1.68337e-06	15	-4.01428	4.09889e-05	0.000113123	15
AZIN1	-5.16216	7.09997e-10	3.46785e-09	9	-4.61033	7.73488e-10	3.39481e-09	10
THAP9	-5.16166	5.41631e-08	2.33894e-07	13	-4.53555	8.26336e-08	3.03671e-07	14
TSSC1	-5.15944	2.75262e-09	1.30468e-08	8	-6.97099	8.50772e-24	7.66738e-23	10
OPLAH	-5.15527	9.98725e-11	5.10027e-10	7	-3.57227	8.76652e-07	2.93415e-06	11
ZNF8	-5.15066	3.94195e-10	1.96049e-09	12	-5.70086	7.81376e-12	3.88542e-11	14
TMEM120B	-5.1475	1.13977e-08	5.16455e-08	14	-9.25625	1.08189e-34	1.72152e-33	16
CDC14A	-5.14718	3.70898e-06	1.37147e-05	9	-4.74923	4.17171e-06	1.29302e-05	11
ACO1	-5.14652	6.45945e-13	3.68887e-12	11	-6.56537	1.63467e-16	1.05577e-15	12
DYRK2	-5.14584	7.36513e-05	0.000236317	18	-3.79169	0.00138393	0.00313903	19
PFDN4	-5.14555	6.50272e-08	2.79586e-07	11	-9.36576	8.33533e-34	1.27907e-32	13
NRG1	-5.14324	3.81774e-10	1.90152e-09	12	-4.45015	1.64312e-08	6.46634e-08	13
TOP3B	-5.13558	6.05103e-07	2.39925e-06	14	-3.87966	0.00182815	0.00409604	14
ELANE	-5.13427	2.53734e-08	1.12695e-07	4	-10.5123	3.02548e-21	2.45877e-20	3
OR52M1	-5.1315	1.60395e-09	7.7037e-09	8	-4.36328	1.41221e-08	5.59299e-08	8
VPS51	-5.12675	2.52191e-07	1.03198e-06	12	-4.11225	2.96887e-06	9.35287e-06	12
C6orf106	-5.12347	4.17859e-09	1.9603e-08	8	-4.35641	2.45477e-08	9.49305e-08	9
SPIDR	-5.11427	7.27677e-08	3.1154e-07	10	-4.49429	1.63361e-07	5.84514e-07	12
C5orf30	-5.11052	0.000119638	0.000371925	4	-7.59437	1.16631e-07	4.22885e-07	4
LACE1	-5.10471	1.20915e-05	4.2337e-05	12	-10.2665	5.03831e-33	7.53694e-32	12
LYRM5	-5.10318	6.36987e-09	2.94585e-08	12	-6.81864	4.85086e-28	6.01709e-27	15
FGF9	-5.10268	4.57685e-08	1.98816e-07	9	-3.92943	1.02017e-05	3.0218e-05	10
ZNF711	-5.10218	2.37806e-09	1.13087e-08	16	-4.14478	2.57613e-07	9.06178e-07	17
DBT	-5.1015	1.61911e-11	8.59016e-11	7	-4.89127	1.61386e-11	7.86527e-11	10
TXNDC5	-5.08898	8.16133e-07	3.19953e-06	13	-3.50611	0.000285636	0.000709321	14
PTPRA	-5.08865	7.50946e-08	3.21229e-07	6	-4.17232	3.97759e-07	1.37973e-06	8
ADARB2	-5.08619	4.16878e-11	2.16841e-10	10	-4.30653	5.65169e-09	2.30402e-08	11
SERPIND1	-5.08538	1.3839e-14	8.38232e-14	13	-4.49615	4.98784e-12	2.51121e-11	14
CDKN1A	-5.08192	6.4684e-10	3.1732e-09	13	-11.7593	9.82681e-54	2.38343e-52	13
TJP1	-5.08181	3.39505e-06	1.25861e-05	11	-4.45426	7.10095e-06	2.14194e-05	12
SNX15	-5.0798	8.91004e-06	3.17259e-05	16	-6.19176	6.3119e-19	4.62959e-18	24
SLC9A8	-5.07853	5.30213e-09	2.46561e-08	8	-7.19968	1.82724e-15	1.11609e-14	8
PCDHGB3	-5.0757	9.2565e-08	3.93129e-07	10	-6.34194	1.7397e-17	1.18747e-16	17
TMLHE	-5.07372	9.75614e-06	3.45314e-05	11	-8.88761	2.15998e-09	9.11806e-09	6
SFMBT2	-5.06996	8.35097e-11	4.27982e-10	8	-11.0893	1.65243e-59	4.46765e-58	9
PCDHGA10	-5.06878	3.75201e-07	1.51385e-06	10	-6.97394	3.72885e-19	2.77409e-18	16
ATP2A1	-5.06718	4.28698e-07	1.72076e-06	8	-4.29851	2.50722e-06	7.97699e-06	10
ANKRD28	-5.0657	2.9995e-08	1.32464e-07	17	-9.28724	1.30251e-24	1.29536e-23	18
PRODH	-5.06569	2.39378e-10	1.20118e-09	9	-4.15078	6.9837e-07	2.36341e-06	10
IQCA1	-5.0647	4.89484e-07	1.95697e-06	17	-4.26861	5.52137e-06	1.68872e-05	17
P2RY11	-5.06216	1.60506e-07	6.67905e-07	15	-4.49077	6.97541e-07	2.36124e-06	17
NR2E1	-5.06059	4.57923e-07	1.83442e-06	5	-11.4174	5.4424e-19	4.01068e-18	7
CLEC4E	-5.05178	3.75748e-09	1.76851e-08	12	-4.26954	4.79125e-07	1.65097e-06	12
ADAM12	-5.05165	1.62009e-06	6.19489e-06	11	-4.64129	8.79597e-07	2.94243e-06	13
AP1S1	-5.04677	2.69568e-08	1.19622e-07	12	-9.11176	3.75249e-32	5.42504e-31	15
ADAM20	-5.04616	3.78287e-06	1.39674e-05	18	-4.02614	1.38797e-06	4.53734e-06	18
PCDHGA8	-5.04489	2.09632e-07	8.6378e-07	10	-6.10679	1.65135e-16	1.066e-15	15
FAM209A	-5.04475	8.52248e-11	4.3655e-10	11	-12.7286	4.54745e-100	2.05062e-98	14
BAMBI	-5.04122	3.97945e-06	1.46664e-05	11	-4.02987	9.03686e-05	0.000239354	12
PCDHGC5	-5.03858	4.03141e-09	1.89478e-08	10	-6.27737	6.56449e-19	4.81203e-18	15
AGO3	-5.03598	3.50428e-08	1.5388e-07	18	-29.8783	1.25214e-219	1.64637e-217	18
PCDHGA2	-5.03242	1.32601e-07	5.56837e-07	10	-6.49232	2.26667e-17	1.53541e-16	16
ZNF35	-5.02801	1.31901e-07	5.54125e-07	15	-9.70295	5.65939e-34	8.73813e-33	17
PCDHAC1	-5.01674	2.94045e-13	1.70236e-12	13	-6.83238	4.70664e-21	3.79294e-20	19
USP30	-5.01368	4.9121e-11	2.54848e-10	9	-4.44891	1.06447e-10	4.92638e-10	9
CLCN5	-5.01117	2.3408e-14	1.40434e-13	19	-5.56075	3.09571e-19	2.31133e-18	20
GRM1	-5.01053	5.16608e-06	1.88402e-05	16	-4.44053	1.16115e-05	3.41589e-05	16
BRIP1	-5.00282	9.08197e-06	3.22812e-05	17	-4.05724	1.82772e-05	5.25674e-05	17
ZGLP1	-5.00241	9.39255e-08	3.98739e-07	16	-4.97837	8.59122e-07	2.87857e-06	17
ZNF728	-5.00171	6.76649e-07	2.67034e-06	12	-4.35153	1.84739e-06	5.95504e-06	12
CUL7	-4.99975	1.11072e-06	4.30426e-06	10	-3.80784	0.000333952	0.000823086	10
HDAC5	-4.99119	4.33813e-05	0.000143293	16	-4.26236	9.9696e-05	0.000262667	18
PCDHA2	-4.98888	1.75825e-11	9.30877e-11	12	-6.64124	7.8922e-19	5.75826e-18	18
DYNC1I2	-4.98793	1.45181e-07	6.06632e-07	11	-4.39443	9.75845e-07	3.25048e-06	15
C19orf82	-4.98643	1.62519e-06	6.21206e-06	15	-3.9413	0.000242703	0.000609489	15
CDH12	-4.98359	4.02222e-07	1.619e-06	13	-4.73149	7.59298e-07	2.55851e-06	17
CCS	-4.98189	7.45895e-10	3.63967e-09	13	-11.9994	1.77383e-77	6.03731e-76	16
BMX	-4.9775	2.88441e-06	1.07802e-05	19	-4.7881	2.18393e-06	6.99654e-06	19
WIPF3	-4.97699	1.24425e-07	5.23809e-07	11	-4.39346	9.59044e-08	3.5048e-07	13
FAM122A	-4.97659	8.4943e-09	3.88559e-08	9	-8.99692	5.95806e-34	9.17659e-33	10
CCDC36	-4.97565	1.75803e-08	7.86012e-08	10	-4.22297	1.32715e-07	4.79257e-07	10
DCHS1	-4.97554	1.27455e-13	7.46461e-13	16	-4.18583	7.24909e-10	3.19008e-09	16
KCNIP2	-4.97344	7.43111e-08	3.18013e-07	11	-4.39197	2.45947e-07	8.66852e-07	13
CCDC142	-4.973	7.32131e-10	3.57423e-09	9	-3.83862	1.26476e-08	5.03285e-08	15
AKNA	-4.96506	2.26134e-06	8.51782e-06	7	-7.3808	3.94977e-09	1.63583e-08	5
ANK3	-4.95913	1.67746e-08	7.51654e-08	7	-3.96251	3.22462e-05	9.00082e-05	7
UHRF1BP1L	-4.95393	3.20141e-08	1.40999e-07	10	-4.22082	2.35674e-07	8.31819e-07	11
PCDHGC3	-4.94826	5.10547e-09	2.37965e-08	12	-7.19205	8.61444e-22	7.21199e-21	17
RPS6KA6	-4.9448	1.24531e-08	5.61753e-08	10	-7.25611	7.04123e-26	7.95227e-25	12
FAM160A2	-4.93905	1.14435e-06	4.43116e-06	16	-15.1434	1.67259e-94	6.91797e-93	19
ZNF330	-4.93483	0.000414706	0.00118449	14	-3.69213	0.000318302	0.00078653	16
ARG2	-4.93415	2.27366e-05	7.71471e-05	13	-8.28036	1.49275e-21	1.23157e-20	14
ETFA	-4.93196	2.08883e-06	7.89451e-06	8	-4.05677	2.02259e-06	6.50133e-06	12
ALDH3A2	-4.92986	9.68395e-08	4.10591e-07	10	-4.12473	1.69832e-06	5.4987e-06	12
C22orf46	-4.92347	3.5327e-10	1.76216e-09	8	-12.6927	1.8065e-37	3.15153e-36	9
PDE7A	-4.91951	7.4917e-06	2.68843e-05	18	-3.84623	0.00040957	0.000993579	18
MUC4	-4.91716	1.68402e-06	6.42962e-06	6	-8.4055	2.1004e-11	1.01337e-10	6
FANCI	-4.91479	1.73416e-05	5.96029e-05	14	-4.27711	0.000103759	0.000272797	15
ICAM1	-4.91368	3.1384e-07	1.27238e-06	9	-8.54924	1.7738e-32	2.58837e-31	11
PRMT2	-4.91343	6.83101e-07	2.6937e-06	11	-4.06124	3.20909e-05	8.96148e-05	13
LANCL2	-4.91185	1.05098e-05	3.70691e-05	9	-4.12705	5.06666e-05	0.000138394	10
PCDHGA5	-4.91001	3.94235e-08	1.72292e-07	10	-5.56917	2.87402e-14	1.64979e-13	17
SP140L	-4.90739	1.52897e-09	7.35055e-09	17	-9.3467	1.47645e-41	2.79007e-40	19
PRR14	-4.90438	2.84738e-06	1.06537e-05	10	-3.79152	0.000786249	0.00184052	10
ZNF782	-4.90284	3.13478e-09	1.48164e-08	6	-4.13689	7.25135e-07	2.45e-06	5
PPAP2A	-4.90239	8.74803e-06	3.11821e-05	8	-3.8511	0.000330983	0.000816089	7
TMEM56-RWDD3	-4.90018	5.08989e-06	1.85892e-05	11	-4.27045	1.92468e-05	5.51277e-05	12
PAPD7	-4.89895	4.18806e-12	2.28565e-11	13	-9.27324	5.79567e-40	1.06461e-38	14
DAPP1	-4.89836	1.41248e-08	6.34893e-08	6	-12.1977	2.08787e-47	4.47335e-46	6
PCDHA10	-4.89748	1.49171e-12	8.33032e-12	12	-5.66582	6.46014e-16	4.03872e-15	18
ASL	-4.89495	2.38512e-05	8.06846e-05	10	-3.76197	0.000188388	0.000479941	10
SUSD3	-4.89331	4.74437e-08	2.05827e-07	11	-3.89752	2.0772e-06	6.67171e-06	11
SLCO1A2	-4.88992	3.46215e-08	1.52097e-07	9	-10.8237	4.5948e-53	1.09321e-51	10
CCL3L3	-4.88916	1.0343e-06	4.02047e-06	12	-3.8685	0.000173895	0.000444834	13
AKAP13	-4.88009	1.33692e-06	5.14917e-06	7	-3.80225	5.23679e-05	0.000142885	7
ERP44	-4.87945	2.54808e-06	9.56929e-06	14	-4.06833	3.61619e-05	0.000100444	15
EMR3	-4.87493	1.56935e-06	6.01227e-06	9	-5.40865	9.31756e-13	4.87173e-12	11
BRE	-4.87327	2.26982e-06	8.54654e-06	10	-8.79442	1.24528e-26	1.44696e-25	12
CT45A1	-4.87123	9.4501e-07	3.68331e-06	11	-4.36781	1.12471e-07	4.08632e-07	13
NUDT6	-4.87122	4.2607e-07	1.71157e-06	8	-6.89982	2.00096e-21	1.6411e-20	10
ZNF581	-4.87034	2.81796e-08	1.24843e-07	10	-3.92328	7.45296e-06	2.24207e-05	11
PCDHGB7	-4.86983	2.35665e-07	9.66313e-07	10	-6.34252	5.40601e-17	3.60141e-16	16
IFNAR2	-4.86702	8.37814e-07	3.28071e-06	11	-4.62329	5.82464e-07	1.98894e-06	13
SLC14A1	-4.86229	7.41686e-05	0.000237825	10	-3.62575	0.00229791	0.00507212	10
PCDHA11	-4.8619	2.14343e-12	1.18712e-11	13	-7.02183	4.0354e-21	3.26042e-20	19
DRAXIN	-4.85783	2.54707e-06	9.56904e-06	9	-4.47035	5.09081e-07	1.74888e-06	11
TRIM27	-4.85743	1.55333e-14	9.39163e-14	28	-8.38742	2.78188e-31	3.88252e-30	28
KCNK10	-4.85691	1.83824e-07	7.60857e-07	14	-3.92962	2.99667e-07	1.04879e-06	17
NARF	-4.85428	0.000100617	0.000316993	16	-4.56525	2.69624e-05	7.59729e-05	19
ZNF208	-4.85176	1.51693e-07	6.33583e-07	12	-4.45833	1.06282e-06	3.52516e-06	13
TYMP	-4.8502	4.84834e-05	0.000158846	17	-4.36987	0.000230728	0.000581276	18
TMEM192	-4.84331	1.34888e-06	5.19326e-06	10	-4.05728	6.51386e-06	1.97248e-05	9
PCDHAC2	-4.83823	4.82044e-11	2.50221e-10	13	-5.64272	1.13037e-16	7.38853e-16	19
MIER3	-4.83789	2.70297e-07	1.10294e-06	10	-5.3411	4.34908e-14	2.47717e-13	14
ELF4	-4.83242	2.50559e-11	1.3155e-10	16	-30	0	0	18
STYXL1	-4.83223	2.95046e-05	9.93431e-05	8	-4.12145	7.25729e-05	0.000194238	8
BTC	-4.8288	3.74647e-06	1.38431e-05	8	-4.04185	2.90897e-06	9.18039e-06	11
TYW1B	-4.82877	2.22393e-06	8.39256e-06	7	-4.12527	5.04859e-05	0.000137991	9
ITGB7	-4.82577	0.000290971	0.000849346	8	-4.01035	0.0028711	0.00623811	5
ATXN2	-4.82259	1.3123e-14	7.95477e-14	20	-3.12699	8.66401e-08	3.17646e-07	26
NUP107	-4.81677	2.907e-06	1.08606e-05	9	-13.9595	1.07303e-71	3.46336e-70	12
HSP90AA1	-4.8159	1.4851e-05	5.14635e-05	12	-4.39129	1.84399e-05	5.29989e-05	13
IL15	-4.81528	3.20255e-08	1.40999e-07	8	-4.33477	1.18398e-07	4.29166e-07	8
AKR1A1	-4.81526	6.80179e-08	2.91823e-07	9	-7.62671	5.03906e-29	6.42274e-28	13
SECTM1	-4.81423	4.90346e-08	2.12455e-07	10	-4.16787	1.62727e-07	5.82412e-07	11
ACADM	-4.81408	4.31601e-10	2.14229e-09	12	-27.4884	6.85802e-298	1.42772e-295	11
PRB1	-4.81247	5.30553e-09	2.46606e-08	10	-4.31879	5.7412e-08	2.1407e-07	12
PCDHA13	-4.80958	2.89836e-11	1.51776e-10	12	-6.17114	2.58097e-18	1.82864e-17	18
CCDC148	-4.80944	5.93499e-07	2.35416e-06	9	-13.507	7.20154e-20	5.54931e-19	5
TEX11	-4.80876	1.14531e-07	4.83974e-07	10	-4.03139	1.20194e-06	3.95715e-06	11
TMEFF2	-4.80684	1.56703e-11	8.31822e-11	18	-4.92108	5.86395e-13	3.12352e-12	14
CCDC107	-4.8058	5.31219e-05	0.0001732	16	-9.79257	1.56753e-24	1.52374e-23	17
RGCC	-4.80442	5.00168e-07	1.9981e-06	10	-3.78662	6.03689e-06	1.83606e-05	10
PCDHGC4	-4.80381	2.40995e-05	8.14427e-05	11	-3.05533	2.85321e-05	8.02147e-05	16
DGKA	-4.79798	1.10923e-08	5.03295e-08	9	-4.06416	1.20355e-07	4.36008e-07	10
PCDHA12	-4.79783	1.556e-12	8.68454e-12	12	-6.22941	1.6849e-19	1.26936e-18	18
TUBB1	-4.79635	7.2377e-07	2.85184e-06	5	-4.23201	8.46649e-07	2.83982e-06	6
PCDHGA7	-4.79464	1.07849e-06	4.18903e-06	11	-6.40185	5.19491e-17	3.46632e-16	16
ZNF136	-4.79447	7.54716e-07	2.96914e-06	9	-4.05617	3.50102e-09	1.45335e-08	10
PHYKPL	-4.79222	4.15205e-05	0.000137687	10	-3.29507	0.000507984	0.00121836	10
SSFA2	-4.78623	4.94021e-07	1.97432e-06	6	-3.78366	1.37484e-05	4.01242e-05	6
NTRK3	-4.78307	1.17255e-05	4.11126e-05	8	-3.42934	0.000106865	0.00028049	8
ZDHHC13	-4.78303	6.52486e-07	2.58003e-06	11	-4.04994	4.50072e-06	1.39155e-05	12
SLC46A3	-4.77458	1.18203e-08	5.34643e-08	7	-13.0066	1.42618e-65	4.18178e-64	8
HLA-B	-4.77433	1.09438e-05	3.85054e-05	6	-3.8669	0.000173851	0.000444812	6
PPP6R1	-4.77249	1.82279e-06	6.92537e-06	10	-3.89631	1.37145e-05	4.00345e-05	10
ZNF646	-4.7715	3.05635e-11	1.59719e-10	6	-3.0633	0.00248493	0.00545432	5
PCDHA7	-4.77128	2.0909e-10	1.05286e-09	16	-5.85182	2.07887e-17	1.41202e-16	23
ZNF695	-4.77051	0.000110334	0.000345555	15	-4.11235	0.000252319	0.000632239	16
ABCG1	-4.76453	3.60409e-06	1.33415e-05	11	-3.62399	4.76156e-06	1.46747e-05	11
NLRP6	-4.76411	1.3605e-05	4.74225e-05	12	-4.12892	8.08212e-06	2.41979e-05	14
MEF2A	-4.75879	1.3613e-05	4.74339e-05	14	-11.9412	2.6389e-42	5.03243e-41	15
ACOX1	-4.74889	4.31964e-06	1.58854e-05	10	-3.60211	3.02225e-05	8.47003e-05	10
ZDHHC17	-4.74712	4.61263e-05	0.000151714	7	-6.92416	1.85035e-06	5.96304e-06	6
NMRAL1	-4.74447	4.59006e-06	1.68369e-05	8	-3.79795	9.18304e-05	0.000242968	9
RBMS3	-4.74229	1.14365e-05	4.01832e-05	9	-12.5433	3.00702e-53	7.2232e-52	10
RAD51C	-4.74057	2.22353e-07	9.14328e-07	6	-3.85279	8.30331e-06	2.48126e-05	6
ENTPD3	-4.74038	5.85727e-06	2.12229e-05	11	-4.26351	4.51392e-07	1.55841e-06	13
CPPED1	-4.73967	1.51937e-14	9.19183e-14	12	-6.96861	9.34123e-28	1.14618e-26	12
COL2A1	-4.7386	1.80419e-05	6.18835e-05	10	-4.05367	1.49069e-05	4.33027e-05	11
PRSS48	-4.73681	9.97346e-07	3.8828e-06	7	-4.45927	2.09387e-06	6.72179e-06	8
BBS9	-4.73545	1.11417e-08	5.05306e-08	9	-7.51297	2.74699e-18	1.94516e-17	9
GPCPD1	-4.73254	4.58513e-06	1.68249e-05	11	-8.5322	6.56188e-22	5.52693e-21	13
QKI	-4.73238	3.8354e-06	1.4151e-05	8	-3.84038	4.01046e-06	1.24569e-05	9
TMSB15A	-4.72816	3.92354e-05	0.000130582	11	-3.86026	4.66272e-05	0.000127808	12
GLS	-4.72701	0.000279532	0.000818086	14	-3.85363	0.00178003	0.00399468	14
SLC25A36	-4.72636	0.000113466	0.000354334	12	-4.11052	0.000338309	0.000833165	12
OCLN	-4.72108	8.24327e-05	0.000262738	4	-7.63076	3.15254e-05	8.81342e-05	4
SIRT3	-4.71967	6.30682e-05	0.000203785	9	-4.29029	8.73512e-05	0.000231706	10
MRPL11	-4.71566	8.81216e-08	3.75204e-07	6	-8.94299	2.31535e-46	4.8363e-45	7
TMEM139	-4.71365	1.42659e-09	6.87145e-09	6	-4.10057	1.5226e-08	6.00909e-08	7
PAK3	-4.70485	5.4489e-08	2.35078e-07	8	-4.08774	5.47911e-07	1.8766e-06	8
PCDHGA6	-4.70126	4.01214e-07	1.61623e-06	11	-6.30804	1.16242e-16	7.59401e-16	16
CEP55	-4.69754	5.58428e-08	2.4061e-07	9	-4.1268	1.66958e-07	5.96532e-07	10
GTF2IRD1	-4.69516	1.31881e-06	5.08333e-06	10	-3.88841	1.37869e-05	4.02272e-05	11
TSC2	-4.69432	1.92102e-07	7.94141e-07	6	-4.00371	2.54095e-07	8.9456e-07	6
PCDHA1	-4.69383	2.39044e-09	1.13569e-08	13	-5.8864	1.90514e-15	1.16083e-14	19
RAP1GAP2	-4.69362	5.75742e-08	2.47769e-07	15	-29.8806	6.96625e-212	8.53092e-210	15
RBM44	-4.68731	3.81518e-08	1.66951e-07	7	-3.99746	2.28806e-07	8.08949e-07	8
NTPCR	-4.68514	1.10779e-07	4.68514e-07	8	-4.52227	9.39902e-13	4.91226e-12	9
SLC16A14	-4.68305	2.34439e-05	7.94402e-05	11	-3.44035	0.000160929	0.000414468	12
NBL1	-4.68198	1.16603e-06	4.51164e-06	12	-3.8285	2.2381e-05	6.36525e-05	14
PCDHA5	-4.68005	4.49451e-08	1.95408e-07	13	-6.0617	1.37293e-14	8.00991e-14	19
SIRPA	-4.67805	6.4312e-07	2.54499e-06	7	-17.7352	3.9959e-127	2.36553e-125	11
UNC80	-4.66864	1.96113e-05	6.70159e-05	8	-3.51679	0.000650812	0.00153896	8
LOC100653515	-4.66816	3.63457e-05	0.000121124	10	-11.1741	3.92132e-49	8.76229e-48	13
PHLPP1	-4.66759	7.08092e-05	0.000227559	11	-3.73765	8.89707e-05	0.000235852	13
C15orf59	-4.6659	0.000235044	0.000696778	12	-3.39883	0.000225783	0.000569749	13
CHUK	-4.66366	7.73354e-07	3.03654e-06	10	-4.44993	2.3358e-08	9.04976e-08	12
PCDHA3	-4.66349	5.34827e-11	2.7705e-10	12	-3.95988	4.60878e-09	1.89307e-08	19
ALDOB	-4.66333	4.61975e-05	0.000151899	16	-29.9807	4.62213e-171	4.00937e-169	16
SLC1A2	-4.65428	6.17425e-06	2.23313e-05	8	-7.37525	1.47261e-21	1.21817e-20	9
CCDC121	-4.65256	3.13223e-06	1.16559e-05	10	-3.51893	1.86315e-07	6.63227e-07	14
TTPA	-4.65047	9.468e-08	4.01773e-07	7	-7.93791	1.929e-24	1.84637e-23	11
CDC42EP2	-4.65007	0.00016495	0.000501056	7	-9.33267	1.72357e-08	6.77443e-08	6
SLC9A2	-4.65004	5.14534e-08	2.22553e-07	9	-4.18245	2.11698e-07	7.508e-07	11
GMPR2	-4.64456	0.000736686	0.00201789	13	-8.41021	4.80795e-23	4.20267e-22	14
NR3C1	-4.64045	1.13871e-05	4.00235e-05	7	-3.83017	9.91415e-08	3.61887e-07	8
NOVA1	-4.63685	9.28246e-09	4.2346e-08	13	-5.21488	7.00346e-09	2.83291e-08	17
PCDHGB4	-4.63488	1.64297e-05	5.66424e-05	10	-4.53026	1.34596e-09	5.7914e-09	16
SMARCD2	-4.63303	1.73745e-08	7.7819e-08	8	-8.54897	8.64188e-28	1.0635e-26	11
PRKAG3	-4.63112	1.41147e-08	6.34723e-08	8	-7.24511	3.70166e-16	2.34588e-15	9
TAF1L	-4.63111	2.90295e-07	1.18215e-06	8	-4.0348	5.89331e-07	2.0102e-06	9
SLC6A8	-4.63051	1.40468e-05	4.87937e-05	14	-3.89389	0.000114522	0.000299518	15
FAM194A	-4.63016	5.73068e-06	2.08165e-05	9	-3.90788	3.32124e-06	1.04104e-05	11
DPY19L2	-4.62898	1.09092e-06	4.23566e-06	10	-4.11596	1.4096e-06	4.5972e-06	11
GOLT1A	-4.62796	8.94455e-06	3.18375e-05	6	-8.04906	1.62564e-07	5.81995e-07	4
TVP23B	-4.62783	6.51654e-06	2.35019e-05	13	-4.20207	6.3982e-06	1.94027e-05	14
C8orf44-SGK3	-4.62332	7.11839e-07	2.80592e-06	6	-3.84284	3.07857e-05	8.61433e-05	9
CRYAB	-4.62203	3.06372e-10	1.53125e-09	16	-5.02707	1.98424e-14	1.14799e-13	18
PRDX6	-4.62036	4.50838e-05	0.000148576	9	-3.85716	8.05057e-05	0.000214094	10
CSTB	-4.61915	8.53093e-08	3.63845e-07	9	-4.02335	2.04245e-05	5.83004e-05	9
ACIN1	-4.61884	1.00023e-10	5.10538e-10	5	-3.89423	7.64576e-08	2.81887e-07	5
GPR20	-4.61796	1.76701e-05	6.06699e-05	8	-3.89584	3.05884e-05	8.56105e-05	9
FASTKD1	-4.61737	1.29848e-08	5.84955e-08	9	-10.0611	8.65467e-48	1.86711e-46	10
TAS2R30	-4.61507	1.01849e-07	4.3165e-07	9	-4.19915	5.14624e-08	1.92807e-07	11
PLAGL2	-4.61501	0.000194525	0.000584039	11	-8.38965	1.31769e-23	1.17566e-22	14
KLF4	-4.61426	1.78041e-05	6.11093e-05	7	-3.82262	0.000232708	0.000585685	8
TP63	-4.61314	1.40375e-05	4.87785e-05	8	-4.38195	3.21253e-06	1.0095e-05	9
PIP4K2B	-4.61252	9.4465e-06	3.35296e-05	6	-3.97973	5.38432e-06	1.65004e-05	5
TINAGL1	-4.61034	1.81013e-09	8.66098e-09	15	-9.04569	1.15552e-36	1.96109e-35	20
KIAA1109	-4.60988	5.4785e-07	2.18081e-06	9	-12.33	1.11359e-72	3.63182e-71	12
NUDT2	-4.60866	0.000112547	0.000351832	13	-7.75086	1.32016e-15	8.13125e-15	14
KRT7	-4.6084	2.97699e-06	1.11086e-05	10	-4.11379	3.4874e-06	1.09094e-05	11
MBOAT2	-4.60372	3.14347e-08	1.38579e-07	9	-3.9176	6.60158e-10	2.91379e-09	11
BSN	-4.60029	0.000377134	0.00108361	8	-3.83971	0.00132933	0.00301904	8
ZNF19	-4.59823	5.25155e-09	2.44322e-08	6	-3.57664	7.60923e-06	2.28423e-05	6
MGST3	-4.59781	4.92156e-08	2.13148e-07	10	-3.66145	4.4049e-06	1.36361e-05	9
DNAJC6	-4.5952	3.03287e-07	1.23207e-06	7	-3.40865	9.7853e-08	3.57392e-07	8
ARHGEF11	-4.59398	3.94024e-05	0.000131095	9	-3.60462	0.00251589	0.0055172	10
STAP1	-4.58832	2.15489e-07	8.8719e-07	7	-3.64481	1.933e-05	5.53533e-05	8
TLL1	-4.5883	3.67597e-08	1.61139e-07	10	-9.41744	9.56843e-33	1.4161e-31	12
TMEM126A	-4.58795	0.000185081	0.000557674	14	-9.20491	2.132e-20	1.66755e-19	15
MDFIC	-4.58587	3.35508e-05	0.00011218	14	-16.3801	1.03867e-81	3.70685e-80	16
KIAA1211	-4.58444	4.24855e-08	1.85113e-07	5	-3.6736	3.37038e-05	9.39508e-05	5
DEF6	-4.58335	8.17234e-08	3.49141e-07	3	-3.79351	3.3932e-06	1.06253e-05	4
ATG5	-4.57752	4.61654e-06	1.69279e-05	9	-4.16971	8.33917e-06	2.49138e-05	11
FAM83E	-4.57684	6.16579e-11	3.18419e-10	11	-3.39303	5.66603e-06	1.73e-05	11
CLIC4	-4.5768	2.76743e-10	1.38454e-09	20	-8.17478	5.70893e-38	1.00579e-36	18
SPRYD3	-4.57611	3.0554e-05	0.000102705	17	-10.2488	1.80523e-24	1.73055e-23	18
KIAA1210	-4.57525	7.3476e-07	2.89288e-06	10	-4.05379	1.47382e-08	5.82947e-08	20
SLC41A3	-4.57211	0.000155299	0.000473452	9	-3.49207	0.00396426	0.00843857	10
GRM6	-4.56732	0.000544835	0.00152297	16	-8.22389	1.15062e-20	9.1138e-20	17
UST	-4.56555	1.22904e-06	4.74999e-06	9	-4.00398	4.48191e-06	1.38642e-05	10
REPS1	-4.56392	5.5347e-07	2.20231e-06	7	-3.7546	8.56266e-06	2.55204e-05	8
PDK4	-4.56275	7.56436e-07	2.97475e-06	11	-10.4919	4.37233e-43	8.52025e-42	12
SLC10A4	-4.55921	1.93956e-11	1.02471e-10	21	-10.798	4.09391e-45	8.38312e-44	23
TMED7-TICAM2	-4.55905	4.67469e-06	1.71287e-05	8	-8.22683	5.9451e-31	8.20555e-30	10
NDUFB1	-4.55903	2.29391e-05	7.77817e-05	5	-3.8924	7.19736e-05	0.00019277	7
ASCL2	-4.5559	5.92385e-06	2.1441e-05	9	-3.46066	1.56637e-05	4.53746e-05	10
FAM208A	-4.55515	2.62957e-06	9.86065e-06	9	-8.1254	5.63163e-22	4.74981e-21	10
CDKN1B	-4.55035	0.00103299	0.00275109	13	-8.29602	1.73879e-17	1.18747e-16	15
SLC25A35	-4.54245	2.97538e-05	0.000100149	12	-3.72488	0.000529716	0.00126805	13
ZNF142	-4.54206	1.7262e-05	5.94189e-05	7	-3.94643	8.17927e-05	0.000217377	9
UNC119B	-4.54206	1.68314e-05	5.79877e-05	6	-10.0922	5.52513e-36	9.16526e-35	8
EN2	-4.54142	0.000201836	0.000604728	9	-7.88348	2.50596e-24	2.36598e-23	14
ANKDD1B	-4.54115	1.60011e-06	6.12545e-06	10	-3.6379	1.50418e-05	4.36744e-05	10
GMDS	-4.53729	1.78789e-07	7.40928e-07	10	-10.3352	2.32673e-47	4.97658e-46	13
CHAC2	-4.53493	6.08667e-06	2.20225e-05	7	-3.81849	0.000112108	0.000293511	9
NECAB1	-4.53438	3.75141e-06	1.38563e-05	8	-10.2866	5.30789e-48	1.15306e-46	10
GGT6	-4.53134	0.000209605	0.000626147	12	-3.5964	0.000114717	0.000299964	14
GOLPH3	-4.52882	0.00084824	0.00230035	12	-4.38086	0.000338475	0.00083341	15
CHFR	-4.52422	1.48874e-05	5.1572e-05	8	-7.30392	5.15055e-20	3.98362e-19	10
TPM1	-4.5242	3.06921e-06	1.1437e-05	6	-3.21105	2.52314e-06	8.02153e-06	8
TNFSF8	-4.52347	8.02971e-06	2.87333e-05	7	-8.74798	1.14662e-25	1.28222e-24	12
TAX1BP1	-4.52266	2.79457e-05	9.42513e-05	9	-3.57836	0.000219235	0.00055412	10
TRMT44	-4.52212	0.000525613	0.00147291	11	-3.88476	0.000732296	0.00172165	12
ZNF14	-4.52102	1.81328e-07	7.50835e-07	8	-3.64251	7.24183e-07	2.44745e-06	10
TMEM56	-4.51691	9.99497e-05	0.000314988	8	-3.61606	0.00236639	0.00521408	9
SRR	-4.51617	9.04992e-08	3.84679e-07	10	-4.14956	7.72918e-08	2.84878e-07	11
ZHX3	-4.51471	2.30492e-07	9.45872e-07	13	-15.3188	2.27402e-68	6.89436e-67	15
MEX3A	-4.51461	4.22693e-06	1.55558e-05	9	-3.72824	0.000225983	0.000570137	9
FNIP2	-4.50909	1.02953e-05	3.63762e-05	11	-4.22054	1.87096e-05	5.37246e-05	14
CPNE9	-4.50583	7.90139e-07	3.10004e-06	7	-3.55454	5.04971e-05	0.000137992	7
MAP2K4	-4.50418	8.96147e-10	4.35598e-09	8	-4.60012	3.36095e-11	1.60235e-10	9
B9D1	-4.49928	5.22719e-05	0.000170594	8	-3.58051	0.000284046	0.000705651	9
DHRS7	-4.49827	1.14574e-05	4.02423e-05	8	-6.10117	2.44161e-12	1.25044e-11	8
TLDC2	-4.49785	1.79418e-05	6.15608e-05	10	-10.0901	7.44927e-39	1.33883e-37	14
FGD2	-4.49775	3.94628e-12	2.1572e-11	8	-9.27779	1.01604e-43	2.00813e-42	11
C20orf144	-4.49688	2.63811e-06	9.889e-06	3	-3.61701	0.000422944	0.00102443	4
ARFIP1	-4.49619	1.02416e-05	3.61989e-05	13	-8.79088	9.46997e-30	1.23863e-28	15
ECHDC1	-4.49417	1.60748e-05	5.54567e-05	12	-11.7898	1.27084e-31	1.7957e-30	13
VSIG10	-4.49417	8.07633e-06	2.88899e-05	8	-3.67271	2.58185e-06	8.19983e-06	11
TCEAL1	-4.48163	1.61731e-10	8.18878e-10	13	-4.8396	2.11582e-08	8.24094e-08	17
VPS52	-4.47942	9.90684e-07	3.85835e-06	6	-4.75432	5.73899e-11	2.69495e-10	8
TMEM61	-4.47185	3.27961e-06	1.21626e-05	8	-3.44954	0.00016782	0.000430262	10
ERMP1	-4.4702	3.2227e-06	1.19735e-05	8	-3.11407	0.00023533	0.000592045	11
ZNRF1	-4.46957	7.8701e-06	2.81921e-05	9	-3.64272	5.44313e-05	0.000148256	9
VPS8	-4.46726	0.000292445	0.000853154	13	-3.51479	0.00462509	0.00974397	14
GBAS	-4.46115	4.55025e-05	0.000149858	10	-4.26362	7.38114e-06	2.22217e-05	12
NEK11	-4.45371	5.276e-08	2.28009e-07	12	-7.17003	1.31224e-17	9.00618e-17	13
CCDC17	-4.45166	3.22506e-06	1.19735e-05	5	-3.79545	4.68824e-06	1.44595e-05	8
COL4A6	-4.44985	0.000306415	0.000891076	8	-9.31955	1.12721e-27	1.375e-26	9
C19orf44	-4.43868	3.94577e-05	0.000131192	6	-7.902	9.36441e-30	1.22611e-28	8
FAM168A	-4.43609	7.76842e-05	0.000248309	6	-3.06776	0.00372448	0.00796754	4
C11orf83	-4.4342	8.51239e-05	0.000270888	9	-3.96502	7.08856e-05	0.000190094	9
NT5C3B	-4.43394	0.000790963	0.00215603	12	-9.39094	6.5268e-27	7.6839e-26	15
GGH	-4.43312	1.39152e-05	4.83867e-05	7	-4.00346	2.65612e-05	7.48762e-05	8
YME1L1	-4.4325	3.50258e-05	0.000116841	7	-3.51208	0.00151992	0.0034344	6
PAXIP1	-4.43037	1.92265e-05	6.57899e-05	8	-3.6008	0.000244487	0.0006136	7
SNED1	-4.42532	3.20018e-06	1.18987e-05	8	-9.7799	1.87986e-39	3.42294e-38	10
CCDC7	-4.42486	9.51785e-05	0.000300703	15	-3.73378	0.00067992	0.00160334	16
CPSF4L	-4.42174	1.37395e-06	5.28577e-06	8	-10.1017	2.86322e-49	6.42091e-48	11
TMED7	-4.42167	0.0001525	0.000465761	9	-9.88472	1.25792e-27	1.52847e-26	14
GCH1	-4.42006	0.000110981	0.000347365	12	-3.75288	0.000143379	0.000371412	14
C19orf38	-4.4197	7.96365e-05	0.000254227	11	-3.73046	0.000129997	0.000338503	12
PCDHGA3	-4.419	1.50817e-09	7.25749e-09	14	-6.55232	3.69354e-19	2.75111e-18	18
RFX2	-4.41577	0.000128199	0.000396666	6	-10.3844	3.63425e-31	5.0608e-30	7
CNTN4	-4.41319	2.45597e-06	9.24055e-06	12	-8.22154	9.50171e-34	1.4527e-32	14
TEX14	-4.41105	5.44158e-07	2.16697e-06	6	-3.19824	0.000756832	0.00177499	6
DNAH14	-4.40934	0.000113913	0.000355442	3	-4.71907	9.55044e-10	4.16241e-09	6
KRTCAP3	-4.40689	1.47321e-06	5.65683e-06	9	-3.36625	0.000309973	0.000767618	9
IFI44	-4.40289	4.17224e-05	0.000138266	10	-4.31817	7.79497e-06	2.33774e-05	11
C1orf174	-4.40202	0.000192643	0.000579076	11	-8.36609	1.14867e-24	1.16556e-23	15
DEFB4A	-4.40194	0.000175799	0.000530658	9	-3.76276	0.000417872	0.00101274	11
ITGB1BP1	-4.39673	1.83727e-05	6.29967e-05	5	-3.88213	1.75065e-05	5.04437e-05	7
OSER1	-4.39594	0.000147287	0.000451068	9	-3.28295	0.000264015	0.000658903	10
NCS1	-4.38701	5.13319e-06	1.87271e-05	5	-3.6147	7.50446e-05	0.000200467	6
C5	-4.38504	0.000193337	0.000580818	16	-5.1586	4.0663e-10	1.82181e-09	24
PIK3C2A	-4.3803	1.6988e-05	5.85072e-05	9	-3.99425	6.55845e-06	1.9855e-05	11
NOTCH1	-4.37697	4.79355e-06	1.75514e-05	10	-3.11729	2.94521e-06	9.28772e-06	13
PROM2	-4.37492	3.45064e-08	1.51657e-07	8	-4.43901	6.45672e-09	2.62194e-08	8
HEXB	-4.3741	1.40034e-05	4.86767e-05	9	-4.04907	6.66358e-11	3.11741e-10	10
CEP19	-4.3663	3.23831e-05	0.000108528	9	-7.30226	1.28884e-07	4.65691e-07	6
R3HDM1	-4.36526	1.48725e-06	5.70641e-06	14	-6.88856	9.57191e-18	6.60933e-17	20
CD163L1	-4.3621	3.22955e-05	0.00010827	15	-8.32423	4.05428e-26	4.60801e-25	15
SYCE3	-4.36188	3.82855e-05	0.000127547	7	-3.72967	2.11101e-08	8.22478e-08	9
PRDM15	-4.36183	5.05871e-05	0.000165416	6	-3.81163	0.000458668	0.00110603	5
SMAD1	-4.36052	2.62028e-07	1.07006e-06	6	-7.48765	6.23705e-24	5.67008e-23	8
PRIMA1	-4.35897	0.002824	0.00702936	8	-3.73568	0.000719621	0.00169344	12
DPP9	-4.35637	6.38686e-06	2.3059e-05	9	-3.86428	4.3168e-05	0.000118795	12
SAMD5	-4.356	3.28434e-05	0.000109997	6	-3.43241	0.000122877	0.000320362	7
SLC5A9	-4.35568	0.000188186	0.000566353	6	-3.50831	6.47385e-05	0.000174503	8
TCEAL2	-4.35544	6.59525e-06	2.37688e-05	12	-3.64852	1.39878e-06	4.56788e-06	13
SOWAHB	-4.35371	2.99815e-05	0.000100881	9	-8.2617	4.78505e-22	4.04398e-21	10
MSL2	-4.3524	0.000473308	0.00134056	11	-6.12613	2.41596e-13	1.32242e-12	14
PTPRR	-4.35036	0.000540645	0.00151168	12	-6.3172	6.45597e-14	3.64234e-13	15
ADAMTS5	-4.34776	0.000787765	0.00214789	13	-9.36144	1.89603e-26	2.18884e-25	15
SPTA1	-4.3474	6.63234e-05	0.000213619	7	-7.48194	3.63065e-22	3.07461e-21	9
KIAA1377	-4.34727	0.000150732	0.000460641	9	-3.27327	8.62613e-05	0.000228912	10
C16orf86	-4.34114	1.3092e-05	4.56816e-05	8	-5.89442	2.65578e-15	1.60103e-14	10
FCAR	-4.3409	2.4534e-05	8.28835e-05	8	-3.73102	6.74848e-05	0.000181514	9
KCNJ13	-4.33932	0.000365797	0.00105314	10	-8.92671	2.2876e-26	2.62632e-25	12
CPVL	-4.33798	0.00148482	0.0038577	14	-4.24953	0.00225949	0.00499261	16
STAMBPL1	-4.33684	4.41904e-06	1.62391e-05	7	-3.59409	0.00015487	0.00039985	7
ZFYVE21	-4.33422	4.47261e-05	0.00014759	9	-3.19542	0.000328593	0.000810677	9
SLC2A9	-4.3329	0.000377727	0.00108501	11	-6.52255	1.12832e-14	6.60754e-14	12
PTPRF	-4.32999	9.54819e-06	3.38429e-05	7	-3.82994	6.62762e-06	2.00498e-05	7
GLRA4	-4.32846	9.06088e-05	0.000287436	8	-8.50176	1.56148e-32	2.28656e-31	11
WDR5B	-4.3264	1.86752e-05	6.4012e-05	6	-3.96517	1.16821e-05	3.43423e-05	7
CBX5	-4.3254	0.000161622	0.000491245	11	-8.72759	7.56104e-27	8.85145e-26	17
OVOL1	-4.32511	5.95385e-05	0.000192886	7	-10.7757	2.50886e-34	3.91727e-33	9
HOMER2	-4.32402	0.000246403	0.000727033	10	-13.0442	2.81329e-36	4.72322e-35	11
LARP1B	-4.32394	6.81848e-08	2.92415e-07	8	-6.5375	5.79405e-17	3.85375e-16	12
IRX6	-4.32047	4.91305e-05	0.000160862	7	-3.03974	0.00230271	0.00508183	8
C15orf48	-4.31935	4.6391e-05	0.000152486	10	-3.17066	4.15555e-05	0.000114585	11
TBX3	-4.31894	1.34506e-10	6.82747e-10	16	-5.13702	5.97876e-12	2.99561e-11	15
SSX2IP	-4.31572	3.11848e-06	1.1612e-05	6	-3.70976	6.41726e-05	0.000173053	6
JUND	-4.31435	1.0638e-05	3.74687e-05	9	-3.76486	3.97028e-05	0.000109792	12
C5AR1	-4.30962	5.05628e-06	1.84732e-05	8	-10.2414	1.2345e-39	2.25772e-38	12
PDXP	-4.30811	5.60217e-06	2.03571e-05	6	-5.04694	1.15686e-11	5.70257e-11	8
KATNBL1	-4.30507	6.59967e-06	2.37762e-05	6	-3.89031	5.73985e-06	1.75083e-05	6
KIF4B	-4.3026	3.52379e-06	1.30538e-05	8	-9.90802	5.14904e-43	1.00026e-41	10
DNMT3A	-4.30145	9.09509e-06	3.23164e-05	6	-3.69425	2.24243e-05	6.37465e-05	7
TSC22D4	-4.29736	0.00022918	0.000680793	8	-10.536	8.75392e-39	1.5688e-37	11
SMIM3	-4.29651	1.10843e-05	3.89864e-05	16	-11.3031	8.13767e-38	1.42964e-36	20
RTFDC1	-4.29595	0.000119062	0.000370248	6	-3.32141	0.00359489	0.00770484	7
LDHAL6A	-4.29245	0.000158491	0.000482598	8	-6.8142	7.45341e-19	5.44448e-18	10
TMEM86B	-4.28783	0.000173675	0.000525031	10	-9.10238	1.27401e-22	1.09749e-21	10
C11orf85	-4.28682	0.000195018	0.000585343	11	-9.49944	2.67711e-27	3.20919e-26	13
ARAP2	-4.2868	1.36445e-05	4.75273e-05	9	-3.98101	5.5269e-06	1.69e-05	11
CUZD1	-4.28461	0.000174234	0.000526564	5	-3.91254	0.000113541	0.000297077	6
TNFSF10	-4.28459	0.000158757	0.000483135	13	-6.56648	6.74727e-12	3.37391e-11	14
SEPP1	-4.28328	0.0001654	0.000502146	5	-4.02176	2.91401e-05	8.18321e-05	5
SLC8A1	-4.28126	5.86846e-06	2.12558e-05	9	-3.72385	8.98685e-06	2.67337e-05	10
PAQR8	-4.27886	0.000507129	0.00142706	11	-3.87804	9.13137e-05	0.000241755	11
CXCL16	-4.27882	0.000404704	0.00115676	9	-3.88183	0.000393619	0.000957488	10
ZNF621	-4.27641	0.000679829	0.00187436	8	-3.56371	0.00311074	0.00672603	9
ANKRD26	-4.27636	4.16421e-05	0.000138046	8	-3.5392	0.000408777	0.000991849	9
ASB1	-4.27471	4.56705e-05	0.000150362	8	-7.78475	2.78003e-26	3.18874e-25	9
KLRD1	-4.27466	0.000109551	0.0003434	7	-3.52041	0.000402575	0.000977749	7
RBP3	-4.27196	0.000157545	0.000480153	8	-4.07059	5.05943e-05	0.000138227	8
RHOC	-4.27156	1.55905e-07	6.49828e-07	11	-8.95772	1.15139e-36	1.95673e-35	15
TMEM215	-4.27101	6.11698e-05	0.000197841	11	-3.81688	9.5151e-05	0.000251169	12
SLC25A11	-4.26783	0.00120567	0.0031766	9	-9.01579	6.11834e-21	4.90527e-20	11
FBXW4	-4.26778	2.62674e-06	9.85369e-06	5	-3.3095	0.000220603	0.000557352	5
LURAP1L	-4.26451	1.67771e-06	6.40795e-06	10	-3.65984	0.000155316	0.000400837	12
SSTR2	-4.26273	1.02293e-05	3.61681e-05	5	-13.3395	3.85238e-52	8.97762e-51	6
ANO10	-4.25944	8.25601e-07	3.23414e-06	4	-10.7072	2.97755e-56	7.62144e-55	6
TAF6	-4.2586	0.00216033	0.00549808	3	-29.7599	1.42235e-24	1.39565e-23	3
CDH3	-4.25609	9.17708e-07	3.58243e-06	11	-5.82583	1.17096e-09	5.06982e-09	9
TRIM45	-4.25448	0.000378151	0.00108592	7	-3.35663	0.000139186	0.000361149	9
DNAI1	-4.25353	0.000145556	0.000446311	9	-3.61614	0.000358613	0.000878149	12
UGT2A1	-4.24488	0.000476184	0.00134636	8	-9.62146	1.69787e-25	1.8902e-24	13
PCNXL2	-4.24357	0.000170639	0.000516317	7	-3.46048	0.000994256	0.00229731	8
UBE2E3	-4.23905	8.18908e-06	2.92828e-05	7	-3.29108	0.000875348	0.00203916	7
ENTHD2	-4.23806	5.23078e-05	0.000170601	6	-3.06993	0.00292931	0.00635684	5
GABPB2	-4.23734	2.81828e-08	1.24843e-07	10	-8.48622	1.0871e-28	1.37439e-27	12
PDK1	-4.23165	6.78784e-07	2.67772e-06	6	-8.95886	3.18126e-35	5.16067e-34	9
CYP3A5	-4.2312	2.57413e-06	9.66351e-06	4	-3.11293	0.000704265	0.00165793	6
KIF16B	-4.22451	0.000678475	0.00187114	9	-3.56598	0.00120356	0.00275009	10
REL	-4.22382	1.04389e-05	3.68448e-05	8	-12.4293	4.80558e-63	1.37047e-61	10
C1GALT1	-4.22316	0.000503276	0.00141819	11	-3.85737	0.000443838	0.00107234	13
NLRP9	-4.22223	0.000911878	0.00245511	7	-12.3565	1.57496e-40	2.91881e-39	11
TMEM173	-4.21876	0.000587923	0.00163346	8	-3.7339	0.00120332	0.00275009	8
APBB2	-4.21687	3.62849e-06	1.34269e-05	3	-3.69861	7.92086e-06	2.37379e-05	3
APITD1	-4.21627	7.61652e-10	3.71476e-09	12	-3.96098	1.17796e-05	3.46048e-05	10
ZMAT1	-4.21328	0.00011658	0.000362979	5	-3.36646	0.00194573	0.00434158	6
BAGE2	-4.21263	1.73137e-05	5.95476e-05	11	-9.11738	1.25754e-25	1.40374e-24	13
ABHD14B	-4.21153	1.05401e-05	3.71627e-05	8	-7.44688	2.63962e-24	2.4828e-23	8
TAPBPL	-4.21	0.00125704	0.00330324	6	-3.61214	0.00344537	0.0074098	7
CCDC65	-4.20528	0.000253406	0.000745515	9	-3.51582	0.00165549	0.0037259	11
FAM188A	-4.20481	0.00195447	0.00500319	11	-3.5989	0.00153745	0.00347212	12
WBP5	-4.20428	0.00086282	0.00233675	12	-13.1937	3.01385e-46	6.27434e-45	16
TTC12	-4.20303	3.18066e-06	1.18305e-05	7	-6.25819	2.40216e-16	1.53952e-15	7
WDR91	-4.2023	1.46481e-06	5.62673e-06	5	-3.38313	5.89963e-05	0.000160062	5
RRAGB	-4.20066	8.56727e-05	0.000272548	7	-4.03385	2.25318e-08	8.74594e-08	9
ADRM1	-4.19782	0.000202886	0.000607696	9	-3.49463	0.000970499	0.00224574	10
HSD17B13	-4.19656	0.000174328	0.000526689	12	-4.24501	1.40381e-05	4.09217e-05	15
SOX5	-4.19552	7.30737e-09	3.36246e-08	8	-4.18732	9.42536e-08	3.4475e-07	10
IQCH	-4.19469	0.000511583	0.00143799	7	-9.47566	3.16121e-26	3.60938e-25	9
H3F3C	-4.19464	0.000147846	0.000452376	12	-3.25362	0.000159193	0.000410335	11
AAK1	-4.19118	0.000473465	0.00134056	11	-11.3415	7.73485e-31	1.05939e-29	13
TRAFD1	-4.19103	3.06026e-05	0.000102834	5	-3.43566	0.000231359	0.000582641	6
IFNAR1	-4.18771	0.000167656	0.000508511	11	-5.7524	1.08777e-16	7.12127e-16	17
TUBB4A	-4.18649	0.000203709	0.000609978	5	-3.27507	0.00139772	0.0031684	6
ACOXL	-4.18561	8.99364e-06	3.19897e-05	9	-3.92536	0.00163309	0.00368013	9
RABAC1	-4.18513	0.000619403	0.00171667	4	-9.47449	2.04305e-26	2.35422e-25	7
CSPP1	-4.18296	0.000237544	0.000702744	7	-3.41327	0.000250366	0.000627851	8
SLC31A1	-4.1779	0.000480054	0.00135617	6	-8.12117	1.90973e-15	1.1625e-14	8
ZNF414	-4.177	0.00069881	0.00192092	8	-3.40753	0.00340658	0.00733143	9
KIAA1804	-4.17587	0.000627381	0.00173735	9	-3.73282	0.000768658	0.00180137	11
TRMT10B	-4.17233	0.000161279	0.000490497	9	-11.1233	2.054e-34	3.23538e-33	11
ZBTB1	-4.17131	0.00277658	0.00692497	13	-30	7.36762e-197	8.00252e-195	17
BCL2L14	-4.1698	0.000526166	0.00147405	8	-9.26976	1.47713e-07	5.30958e-07	11
FEZF1	-4.16602	0.000933858	0.00250893	9	-3.42149	0.00206489	0.0045886	9
SESN3	-4.16294	1.23973e-05	4.33477e-05	4	-3.44959	7.91134e-05	0.000210436	5
RALA	-4.15919	2.57669e-05	8.69611e-05	7	-5.08477	3.28334e-11	1.56714e-10	10
DNAJC21	-4.15786	1.57447e-05	5.43921e-05	7	-3.22084	0.00021885	0.000553259	7
TNKS1BP1	-4.15775	0.000881994	0.00238164	8	-8.69732	2.01272e-22	1.7161e-21	8
HIF3A	-4.15765	0.000126926	0.000393248	5	-3.4322	0.00251228	0.00551025	5
ME2	-4.1559	1.095e-07	4.63299e-07	7	-3.3806	0.000110743	0.000290181	8
SESN2	-4.15099	2.36769e-05	8.01758e-05	9	-3.53498	0.000809265	0.00189121	9
FAM219A	-4.1496	1.33866e-07	5.61447e-07	32	-5.46971	4.47185e-16	2.82539e-15	22
NADK2	-4.14891	9.69576e-07	3.7776e-06	7	-4.25124	3.96184e-06	1.23164e-05	10
FASTK	-4.14557	0.00024334	0.000718416	6	-8.93963	8.3689e-25	8.89668e-24	7
TTC7B	-4.14466	0.000303828	0.000884064	7	-4.72934	1.01487e-10	4.70378e-10	8
MAP2	-4.14393	0.00204049	0.00520884	7	-3.6569	0.00282849	0.00615516	7
RBM5	-4.14313	6.0217e-10	2.96126e-09	26	-4.27445	1.67539e-11	8.1588e-11	21
SLC26A11	-4.13946	1.57124e-06	6.01724e-06	5	-3.1204	8.00633e-06	2.39883e-05	6
ACOT1	-4.13838	0.000222467	0.000662021	9	-3.6272	0.000149817	0.000387284	10
FAM228A	-4.13837	1.87517e-07	7.75505e-07	7	-9.39472	3.0777e-34	4.78153e-33	9
TUBB6	-4.13659	0.000658415	0.00181854	10	-9.9153	2.03538e-33	3.09293e-32	15
PIGO	-4.13493	3.03225e-05	0.000101961	17	-4.81034	1.46867e-11	7.1773e-11	21
MAPK14	-4.13465	0.000372712	0.00107213	10	-3.6038	0.00111075	0.0025509	12
KCNA4	-4.13326	0.000131593	0.000406335	7	-3.1068	0.000216719	0.000548205	7
SEC22A	-4.13316	7.51371e-05	0.000240625	6	-6.88357	2.98689e-18	2.10906e-17	8
MLF1	-4.13305	0.000241507	0.000713608	7	-11.0105	8.92476e-33	1.32241e-31	8
CNTLN	-4.12895	0.000193002	0.000579984	8	-3.40145	0.0011635	0.00266616	9
PRR5-ARHGAP8	-4.12785	1.29539e-07	5.4443e-07	13	-6.31793	5.30666e-19	3.91527e-18	14
SLC25A47	-4.12645	5.8228e-11	3.00859e-10	22	-4.35557	2.35331e-11	1.13189e-10	24
PCDH7	-4.12195	9.7213e-05	0.000306939	6	-3.7792	0.000121798	0.000317617	8
FRMPD1	-4.1205	4.27707e-05	0.000141461	7	-3.50581	9.99458e-05	0.000263269	8
ZNF451	-4.11848	1.1137e-05	3.91581e-05	13	-3.4637	6.10609e-05	0.000165232	11
TMEM135	-4.11818	2.01635e-05	6.87863e-05	8	-3.42288	0.000377965	0.000922281	9
INPP5K	-4.11641	0.00345299	0.00845322	8	-9.91771	1.72564e-23	1.52981e-22	11
PRDX3	-4.11634	0.00239329	0.00604522	9	-3.36859	0.000358258	0.000877755	12
NEUROD2	-4.11528	0.000238443	0.000704782	8	-3.59098	0.000762109	0.00178697	11
CDK16	-4.11418	0.000476332	0.00134641	7	-9.83929	1.4444e-20	1.13974e-19	9
TBC1D30	-4.11344	8.48864e-05	0.000270217	6	-9.14335	2.32914e-36	3.92621e-35	7
NUDT17	-4.1106	7.26092e-05	0.000233121	8	-3.46302	0.00381926	0.00815214	9
ATXN7	-4.11026	4.07424e-05	0.00013533	6	-3.22738	0.000477903	0.00115019	6
HIF1AN	-4.10933	0.000295777	0.000862625	6	-3.53156	0.000373706	0.000913139	7
PROC	-4.10682	0.000146857	0.00044989	10	-8.5814	1.67272e-23	1.48606e-22	11
MORC2	-4.10569	0.000402103	0.00115045	11	-8.58138	1.8609e-26	2.15028e-25	13
H1F0	-4.10287	0.0001907	0.000573748	7	-3.16563	0.00220134	0.00487015	7
KCTD15	-4.10117	0.00092675	0.00249092	6	-6.77981	1.86565e-15	1.13844e-14	8
ACVR2A	-4.10017	7.41566e-05	0.000237825	6	-3.41683	0.000356485	0.000873965	7
NEIL1	-4.09824	6.03355e-05	0.000195331	10	-3.42226	0.000967452	0.0022391	11
EID3	-4.09824	0.0033377	0.0082088	12	-8.27281	1.7689e-18	1.26403e-17	12
FAM132A	-4.09812	1.09722e-06	4.25847e-06	10	-6.96332	4.00687e-19	2.97208e-18	17
MTMR4	-4.09767	5.45219e-05	0.000177592	7	-3.01879	0.0014467	0.0032725	7
C16orf52	-4.0935	2.23402e-05	7.59039e-05	5	-3.35149	0.00025563	0.000639509	6
AGR2	-4.08625	0.00241335	0.00608827	4	-3.61273	0.00274536	0.0059847	4
FRMD3	-4.08159	2.18773e-07	9.00342e-07	7	-3.85275	8.34953e-06	2.49328e-05	7
NUP50	-4.08053	0.000127063	0.000393553	10	-9.82087	3.00472e-30	4.00982e-29	11
MVP	-4.08033	0.000521989	0.00146357	6	-15.2502	1.2081e-24	1.21305e-23	8
PPP1R3B	-4.07965	3.29803e-05	0.000110383	8	-9.31273	6.84005e-30	8.99358e-29	8
ZNF684	-4.07899	4.48036e-05	0.000147749	6	-5.67704	7.88359e-12	3.91858e-11	8
DSE	-4.07674	0.000336074	0.000972284	7	-9.69064	5.45268e-35	8.7657e-34	9
SUPT7L	-4.07484	2.53764e-06	9.53719e-06	9	-3.37722	0.000753375	0.00176721	9
PDIA6	-4.07441	1.92057e-05	6.57411e-05	6	-10.7665	7.05153e-36	1.16355e-34	7
DNAAF1	-4.07439	1.52256e-08	6.84069e-08	20	-3.28628	2.93459e-08	1.12649e-07	15
SLC25A21	-4.07216	0.00136091	0.00354766	8	-3.44108	0.00396308	0.0084375	10
KIAA2022	-4.07164	0.000196539	0.000589733	5	-3.19802	0.00199104	0.00444028	5
KCNN2	-4.07086	0.00114361	0.00302654	9	-3.6467	0.00293602	0.0063703	10
C2orf42	-4.06967	2.38231e-05	8.06166e-05	6	-3.40492	5.33612e-05	0.000145405	6
DLC1	-4.06858	0.00184557	0.00473883	9	-7.27043	3.45567e-24	3.20689e-23	12
EME2	-4.06681	0.00175706	0.00452192	8	-13.5555	6.4353e-40	1.18037e-38	11
SLC23A3	-4.06614	0.000693622	0.0019077	7	-3.53732	0.00113888	0.0026112	7
RASSF3	-4.06575	0.000846943	0.00229806	5	-3.70523	0.00116792	0.0026758	6
KRT23	-4.06524	4.84956e-06	1.77436e-05	11	-3.84367	7.70306e-05	0.000205245	12
RECQL	-4.06073	3.96487e-06	1.4618e-05	10	-10.039	1.86715e-35	3.04075e-34	10
CLEC17A	-4.06042	0.000307874	0.00089506	7	-3.30609	0.00248441	0.00545432	8
SLC9A6	-4.05962	1.44733e-05	5.02063e-05	7	-3.64748	3.13868e-06	9.8704e-06	9
PAWR	-4.05868	0.000747154	0.00204379	7	-3.20865	0.0033762	0.00727231	7
SLC23A1	-4.05748	1.45407e-05	5.04226e-05	6	-13.1854	7.11691e-61	1.96241e-59	8
ASAP1	-4.05563	1.14966e-06	4.45004e-06	10	-3.70066	1.05861e-05	3.12972e-05	12
MT1F	-4.0543	0.000128468	0.000397294	8	-3.70872	0.000158529	0.000408708	10
NLRP1	-4.05421	4.54366e-05	0.00014969	9	-3.34389	0.000158415	0.000408581	8
NRP2	-4.05303	0.00410934	0.00992278	9	-3.55219	0.00246203	0.00540763	10
ACVR1	-4.04889	0.000284883	0.000832537	7	-3.09587	0.00299541	0.00649239	7
GBP6	-4.0472	0.00217724	0.00553694	9	-15.2029	4.20119e-53	1.00531e-51	12
CETN3	-4.0459	5.69923e-05	0.000185042	7	-3.68166	5.72783e-05	0.000155569	8
CLEC18B	-4.0451	0.000732992	0.00200886	7	-10.9234	5.0425e-34	7.80494e-33	9
UQCC1	-4.04027	0.00068561	0.00188824	6	-3.63557	0.00232799	0.00513399	8
SNX24	-4.03966	0.00191485	0.00490798	9	-29.7718	9.41298e-175	8.45882e-173	10
PLEKHF2	-4.03538	0.000616018	0.0017087	8	-3.22564	0.00318761	0.00688627	9
PCGF5	-4.03268	0.000599415	0.00166493	10	-3.43465	0.000494127	0.00118741	13
SLC16A8	-4.03085	0.000129784	0.000400995	6	-3.72618	0.000139844	0.000362706	10
CDK5	-4.0305	5.3694e-05	0.000174952	11	-6.74811	1.26332e-15	7.7965e-15	13
CLDND2	-4.03038	3.32135e-05	0.000111089	5	-3.43055	0.000214638	0.000543272	5
ORAI3	-4.0294	4.12059e-05	0.000136734	5	-3.28087	0.000214636	0.000543272	6
MYOM1	-4.02742	0.00023807	0.000704094	9	-3.72743	0.00017711	0.000452964	13
ABHD4	-4.02663	0.000297691	0.000866954	6	-10.7226	2.8688e-30	3.83254e-29	8
WFIKKN2	-4.02119	7.73631e-05	0.000247439	8	-7.93659	7.18285e-24	6.50152e-23	11
ZSCAN1	-4.01968	0.000176436	0.000532422	8	-3.47417	0.000799358	0.00186941	9
RPRD1A	-4.01805	0.000781648	0.00213179	7	-3.06901	0.00101693	0.00234666	9
LCT	-4.01478	0.00041049	0.00117278	8	-15.6452	6.00739e-80	2.10782e-78	10
LRRC8B	-4.00744	0.000208634	0.000623614	5	-6.93704	8.22691e-14	4.62477e-13	6
C14orf79	-4.00743	0.000168179	0.000509945	5	-3.07049	0.0035919	0.00769975	5
SPAG7	-4.00173	4.2493e-05	0.000140681	5	-6.50452	1.2175e-16	7.93314e-16	7
LIN7A	-3.99661	0.00185742	0.00476685	11	-3.52969	0.00260344	0.00569421	13
RASL11B	-3.99601	0.00108096	0.00287126	9	-3.41959	0.00103431	0.00238457	12
RUFY2	-3.99533	0.000228152	0.000677939	6	-3.63583	5.85562e-05	0.000158902	7
ACSM3	-3.99361	0.00132153	0.00345033	6	-3.37593	0.00185625	0.00415081	7
WFIKKN1	-3.99117	0.000503512	0.00141846	7	-6.63643	9.75555e-18	6.73241e-17	9
KLRG1	-3.98791	0.000512279	0.00143915	5	-3.36437	0.00174338	0.00391735	5
SOX15	-3.98742	0.0016459	0.00424993	8	-9.03321	1.22135e-19	9.29107e-19	8
MAP3K6	-3.98717	0.000131996	0.000407205	6	-3.40662	0.00014787	0.000382411	6
COMMD7	-3.97899	0.000397885	0.00113935	9	-3.78067	0.000400121	0.000972356	11
KIAA1430	-3.97824	0.000200215	0.000600406	8	-3.30465	0.000948466	0.00219842	10
DERL2	-3.97683	0.000185558	0.000558777	8	-3.42699	0.000600765	0.00142855	9
TRIM49	-3.97443	0.000314117	0.000912423	6	-10.8232	3.89503e-24	3.60124e-23	7
SPTY2D1	-3.97428	9.92609e-05	0.000312915	11	-6.80227	7.33111e-08	2.70846e-07	7
UGT2A2	-3.97333	0.000500212	0.00141074	8	-8.86205	1.44423e-20	1.13974e-19	12
SERINC1	-3.97096	0.000332554	0.000963482	8	-6.53641	2.01712e-15	1.22548e-14	9
NODAL	-3.9694	0.00143456	0.00373191	5	-3.29218	0.00269486	0.00588384	6
DALRD3	-3.96878	1.03746e-05	3.66434e-05	8	-10.4769	6.423e-46	1.33051e-44	9
APLF	-3.96877	0.000428624	0.00122044	5	-8.28282	1.43568e-10	6.58818e-10	4
AUTS2	-3.96759	2.95561e-06	1.10341e-05	8	-4.04067	1.17628e-06	3.87675e-06	6
GOLT1B	-3.96414	3.11261e-05	0.000104558	12	-3.27053	0.0024177	0.00531672	10
USP6	-3.96262	0.000993453	0.0026535	8	-6.21269	4.37734e-13	2.35374e-12	9
PHACTR2	-3.96159	1.83929e-06	6.98541e-06	8	-4.17005	5.40399e-06	1.65525e-05	9
DRAM2	-3.95911	0.00261122	0.00655304	7	-3.91608	0.000673906	0.00158946	11
RRBP1	-3.95779	0.000112041	0.00035049	8	-7.78706	1.03818e-20	8.23879e-20	10
ZNF70	-3.9568	1.48351e-05	5.1426e-05	8	-7.51509	1.28449e-15	7.91933e-15	10
CMTM2	-3.95603	0.000103089	0.000324174	6	-12.4011	5.84143e-51	1.34127e-49	7
SQSTM1	-3.95538	0.000190848	0.000574023	6	-3.13548	0.00249512	0.00547551	7
DHX34	-3.95299	1.19208e-05	4.17684e-05	9	-3.35244	0.000253119	0.000633863	9
MUC12	-3.9525	0.000181754	0.000547813	7	-8.02078	2.38995e-20	1.8658e-19	9
RABL3	-3.95208	0.00054006	0.00151046	7	-3.65062	0.00034831	0.000855433	11
DYNLL2	-3.95172	0.000223537	0.000665009	7	-3.2623	0.00258964	0.005665	9
EGFR	-3.94858	0.00100629	0.00268352	3	-3.31234	0.00201359	0.00448497	5
DPP10	-3.94538	0.000574577	0.00160034	6	-5.17345	7.39e-12	3.67763e-11	10
CNIH2	-3.94389	0.000143559	0.000440587	5	-3.0569	0.00102293	0.00236008	6
RBP4	-3.94369	0.000774867	0.00211386	10	-3.52518	0.000252292	0.000632239	13
TMEM106C	-3.94262	0.000273278	0.000801642	7	-11.2052	9.62424e-43	1.85371e-41	8
SLC25A28	-3.93891	0.000121989	0.000378882	8	-3.5488	3.98796e-05	0.000110183	9
SLC43A1	-3.93827	0.00161304	0.0041747	9	-3.83448	2.80541e-07	9.82956e-07	13
FHL3	-3.93621	0.00199179	0.00509354	9	-3.5542	0.00309709	0.00669768	10
PARD6B	-3.93426	0.00309768	0.00765206	8	-14.2765	9.75155e-33	1.4415e-31	9
SLC38A1	-3.93252	5.22819e-06	1.90598e-05	3	-5.69944	1.95568e-16	1.2579e-15	4
DRP2	-3.93034	4.69836e-05	0.000154383	9	-3.12763	0.000519283	0.00124403	10
RIPK3	-3.92783	0.000114004	0.000355615	4	-3.64496	7.43909e-05	0.000198805	6
ATP11C	-3.92694	2.27528e-05	7.7176e-05	6	-4.86867	3.34827e-11	1.59692e-10	11
APOC4	-3.92594	5.52708e-05	0.000179799	7	-3.28728	0.00078996	0.00184817	7
CERS1	-3.91951	0.000177489	0.00053544	7	-3.39734	0.00025184	0.000631292	8
YTHDC2	-3.91709	0.0012354	0.00324899	4	-4.75276	2.88363e-08	1.10834e-07	6
ATP5G3	-3.91579	0.000582404	0.00162036	11	-8.37453	1.49175e-16	9.65964e-16	13
CTSD	-3.91209	0.000511787	0.00143816	3	-3.51698	0.000183136	0.000467706	4
ANKRD13C	-3.91076	0.00023115	0.000686241	6	-3.29731	0.000622325	0.00147584	9
RAB5A	-3.9103	0.000131768	0.000406714	10	-7.45556	1.66726e-20	1.3131e-19	13
TNNI3	-3.90835	0.000109237	0.000342544	7	-3.40977	0.000319117	0.000788388	8
PELI1	-3.90644	6.95333e-05	0.000223673	12	-14.1307	2.44642e-48	5.35171e-47	13
C10orf129	-3.90523	0.00106923	0.00284161	12	-6.49724	1.45636e-16	9.44514e-16	15
LMNB2	-3.9052	0.000420798	0.00119985	8	-8.1279	1.07197e-23	9.60543e-23	10
FBXL4	-3.9051	2.38111e-05	8.06032e-05	7	-8.10851	3.36565e-28	4.19146e-27	9
PTK2B	-3.9044	0.00173236	0.00446405	7	-3.61604	0.0012644	0.00288099	9
DHRS2	-3.90381	9.2126e-06	3.27146e-05	7	-3.7378	2.09702e-05	5.97762e-05	7
IL2RG	-3.90213	0.00147595	0.00383563	6	-8.95956	8.34752e-29	1.05857e-27	11
FKBP5	-3.89758	2.83343e-06	1.06054e-05	8	-3.75101	6.71605e-05	0.000180681	8
TTC39B	-3.89706	0.000144572	0.000443562	10	-4.06771	6.50971e-05	0.000175394	11
TRIM41	-3.89678	8.73175e-05	0.000277518	8	-3.5165	2.89711e-05	8.13941e-05	7
FAR2	-3.89423	0.000389878	0.001118	6	-7.39022	1.77821e-15	1.0872e-14	7
SUMO4	-3.89132	0.00146628	0.0038115	5	-8.05685	8.68818e-20	6.66201e-19	7
SYNE4	-3.88796	2.10385e-05	7.1643e-05	3	-3.23203	0.00182653	0.00409313	3
LOXHD1	-3.88486	0.000278425	0.000815082	9	-3.6916	4.83459e-05	0.000132345	11
CDYL2	-3.88254	7.86053e-07	3.08521e-06	9	-3.82216	2.6024e-06	8.26089e-06	10
ALDOC	-3.88192	0.00223104	0.0056609	9	-6.2523	2.16279e-13	1.18801e-12	12
GUCY2D	-3.88166	0.000419857	0.00119818	4	-3.28965	0.000696122	0.00163969	5
METTL20	-3.87966	0.00119203	0.00314231	6	-3.14097	0.00379691	0.00810655	6
DHRS4L1	-3.87791	0.000856831	0.00232177	11	-3.92707	0.000235951	0.000593488	13
LSMEM1	-3.8748	0.000170524	0.000516123	6	-10.2062	2.9447e-33	4.44768e-32	7
TBC1D32	-3.87103	0.000119864	0.000372511	5	-3.37349	0.00113105	0.00259467	6
NF1	-3.86914	1.04411e-08	4.75244e-08	16	-4.22732	2.83227e-08	1.08956e-07	21
CRYBA1	-3.8659	0.00027823	0.000814984	5	-8.81276	8.09931e-22	6.78983e-21	7
SLC13A2	-3.86588	0.00116638	0.00308357	4	-8.48805	2.26577e-26	2.60366e-25	6
C19orf81	-3.86281	3.4979e-05	0.000116724	6	-3.25906	0.000145548	0.000376717	8
ACRV1	-3.85692	0.000220181	0.000655604	5	-3.48902	0.000163796	0.000421071	5
CSNK2A3	-3.85676	9.11558e-05	0.000288989	6	-3.39031	0.000118296	0.00030887	6
BCL2L12	-3.85585	0.00148989	0.00386987	6	-3.28353	0.00303936	0.00657852	7
C9orf129	-3.8541	0.000371058	0.00106768	7	-8.50451	1.86761e-21	1.53274e-20	9
LTBR	-3.84606	0.000520703	0.00146078	6	-8.05943	5.19684e-21	4.18528e-20	9
CHP1	-3.84563	0.000664705	0.00183416	8	-3.02487	0.00398009	0.00847083	9
HOXC5	-3.83715	5.58065e-06	2.02861e-05	7	-3.52761	0.00233256	0.00514315	8
CHKB	-3.8318	1.76723e-06	6.72947e-06	10	-7.40513	1.44625e-13	8.01471e-13	11
ABHD16A	-3.83011	0.00267764	0.00670473	6	-14.2595	1.97344e-53	4.74955e-52	8
LETM2	-3.82764	0.000631064	0.00174707	7	-3.24714	0.000976308	0.00225793	7
FAM46D	-3.82731	0.00106665	0.00283549	4	-3.33648	0.00241809	0.00531672	4
SH3GLB2	-3.82623	1.16668e-05	4.09352e-05	9	-3.5575	9.75288e-05	0.000257147	8
PIK3R3	-3.82459	0.000186676	0.000561978	7	-3.23914	0.000358973	0.000878858	8
PIK3IP1	-3.82351	0.000517482	0.00145215	9	-3.41622	0.000558916	0.00133488	12
ADAMTS17	-3.82239	0.00170542	0.00439689	7	-8.06338	9.90147e-16	6.15626e-15	7
TAS2R46	-3.81942	0.000166985	0.00050663	13	-4.26596	5.71142e-05	0.000155157	13
OAS3	-3.81656	0.000761232	0.00208004	6	-8.84731	5.55905e-21	4.46835e-20	8
RNFT1	-3.81548	1.43699e-05	4.98648e-05	5	-13.5511	1.65929e-44	3.34293e-43	6
NEU4	-3.81507	0.000917716	0.00246951	7	-3.06074	0.000801146	0.00187294	8
WDR89	-3.8127	4.48189e-05	0.000147751	6	-3.08601	0.00104164	0.00240013	6
STRADA	-3.80818	0.00241705	0.00609608	6	-3.54399	0.00454268	0.00958489	8
NR2C1	-3.8048	0.000461449	0.00130984	6	-3.16695	0.0013249	0.0030106	6
UBL3	-3.80339	0.00186058	0.00477373	6	-3.47831	8.34443e-06	2.49235e-05	11
KIF1B	-3.80005	0.000414979	0.00118493	8	-3.41329	0.00101185	0.00233536	9
TRPT1	-3.79909	0.000105327	0.000330901	6	-5.9665	2.21029e-19	1.65918e-18	7
LTC4S	-3.7943	9.27399e-05	0.00029355	4	-3.23775	0.000170554	0.000436823	4
HIPK2	-3.79356	2.11827e-06	8.00278e-06	14	-3.19481	1.47204e-06	4.79209e-06	17
EXOC6B	-3.79263	0.00013341	0.000411191	6	-8.85775	6.34751e-11	2.974e-10	6
CCNA1	-3.79131	0.00208583	0.00531652	5	-4.65712	7.28406e-09	2.94355e-08	7
STYX	-3.79073	0.00273197	0.00682892	10	-14.5445	1.24824e-45	2.57289e-44	15
ZSWIM6	-3.79062	0.00326511	0.00803812	7	-3.03255	0.00394413	0.00839859	7
EIF4EBP2	-3.78418	0.00161527	0.0041788	8	-5.96515	6.23103e-13	3.30215e-12	9
SUV39H1	-3.77728	0.00131465	0.00343592	9	-3.64513	0.000458231	0.00110519	12
KLHL17	-3.7772	0.000380608	0.00109266	5	-9.93197	4.71874e-32	6.76714e-31	8
CNST	-3.77296	3.22419e-05	0.000108127	9	-3.07403	2.32654e-05	6.59872e-05	10
SUN1	-3.77285	0.000611901	0.00169774	7	-3.52815	0.000206084	0.000523317	8
NHS	-3.76541	7.45689e-05	0.000238957	7	-3.69136	1.72423e-05	4.974e-05	9
C12orf57	-3.75926	0.00132319	0.00345379	7	-8.56456	7.10676e-25	7.64604e-24	10
CPS1	-3.75883	0.00240048	0.00606187	7	-3.13135	0.0034669	0.00745482	8
ARMCX2	-3.75869	0.000360702	0.00103936	5	-3.03508	0.00098904	0.00228653	4
SH3BGRL2	-3.74974	0.00275426	0.00687612	11	-3.59914	0.00129286	0.00294263	12
CYP4X1	-3.74866	0.00268615	0.0067227	8	-4.57542	1.773e-09	7.54569e-09	10
NKD2	-3.74484	0.00137807	0.00358868	6	-7.89852	6.86934e-22	5.782e-21	11
BEX4	-3.74483	0.00140247	0.00365034	4	-6.68562	1.38761e-15	8.53406e-15	5
NIPSNAP1	-3.74138	0.00338035	0.00830155	7	-3.40615	0.00412577	0.00876744	9
[truncated: 139 more rows]
