# Supplementary material for: An In Vivo CRISPR Screen Identifies Stepwise Genetic Dependencies of Metastatic Progression
Source: Oxford University Press journal article supplement (doi:10.1158/0008-5472.can-21-3908), 2021-12-16
Supplement: can-21-3908_table_s8_supps8.xlsx [file can-21-3908_table_s8_supps8.xlsx]

## Sheet: Sheet1
Table S8. Genes specifically depleted in single CTCs and CTC clusters compared to the primary tumor of CRISPR-CDX-BR16 mice, further stratified according to their clinical relevance. The table shows the 109 genes that are significantly depleted in CTCs (both single CTCs and CTC clusters) when compared to the primary tumor of CRISPR-CDX-BR16 mice, that are expressed in CTCs of breast cancer patien…
genes	log2FoldChange_s	pvalue_s	padj_s	log2FoldChange_cl	pvalue_cl	padj_cl	tcga_cox_coef	tcga_cox_pval	tcga_cox_adjpval	tier_depleted_4_exp_patients_surv	tier_depleted_4_exp_xenograft_surv
S100A16	-30	0	0	-12.6947	8.2401e-104	3.95874e-102	0.2024	0.03	0.318038	TRUE	TRUE
FBXW11	-29.7609	6.3212e-274	5.96143e-272	-8.20027	1.75612e-24	1.69257e-23	0.1941	0.023	0.291555	TRUE	TRUE
SNX18	-30	2.50437e-248	2.17859e-246	-7.23862	1.76438e-25	1.9625e-24	0.2055	0.02	0.281863	TRUE	TRUE
MID2	-30	1.06544e-223	7.41476e-222	-29.9894	1.08532e-295	2.22241e-293	0.208	0.021	0.285093	TRUE	TRUE
ZBTB21	-30	1.75259e-216	1.17121e-214	-29.9741	0	0	0.2038	0.019	0.277888	TRUE	TRUE
MYO1D	-29.9653	2.27199e-188	1.18791e-186	-29.8795	2.5031e-242	3.86002e-240	0.185872	0.032	0.322988	TRUE	TRUE
BMF	-29.9796	6.54226e-188	3.38554e-186	-5.9293	6.79768e-12	3.39775e-11	0.1882	0.04	0.347837	TRUE	TRUE
KIF2A	-29.9156	3.05702e-161	1.28535e-159	-10.04	2.82796e-26	3.24073e-25	0.1922	0.019	0.277888	TRUE	TRUE
NEDD4	-29.4776	3.26742e-116	9.10817e-115	-29.9151	1.42938e-133	8.83883e-132	0.1959	0.036	0.33418	TRUE	TRUE
C15orf52	-29.8953	4.36288e-108	1.14353e-106	-28.7811	2.52989e-132	1.54906e-130	0.1964	0.033	0.325001	TRUE	TRUE
SGIP1	-11.8934	7.53408e-83	1.53279e-81	-18.8365	1.11739e-156	8.51055e-155	0.2188	0.018	0.274352	TRUE	TRUE
ENC1	-29.9455	3.28174e-69	5.93477e-68	-11.7042	2.05179e-14	1.18543e-13	0.2859	0.0018	0.155229	TRUE	TRUE
IYD	-12.0441	2.50349e-59	4.10775e-58	-5.64146	1.41236e-29	1.83197e-28	0.2858	0.0017	0.152123	TRUE	TRUE
PLEKHA8	-13.2527	1.21349e-43	1.68901e-42	-4.05192	5.56538e-07	1.90354e-06	0.2182	0.014	0.251095	TRUE	TRUE
PCDH12	-10.9465	3.15641e-38	4.07306e-37	-6.14634	6.32907e-21	5.07097e-20	0.2126	0.021	0.285093	TRUE	TRUE
PDSS1	-29.6246	3.99874e-36	4.98164e-35	-11.6528	8.53073e-07	2.8606e-06	0.203	0.024	0.293718	TRUE	TRUE
TPD52	-10.451	7.17153e-29	7.77313e-28	-3.70777	5.61838e-08	2.09615e-07	0.2107	0.027	0.302822	TRUE	TRUE
PCDHGB5	-7.71717	1.34716e-26	1.41019e-25	-6.78807	1.3636e-22	1.17387e-21	0.209	0.018	0.274352	TRUE	TRUE
PTPDC1	-29.8456	3.30853e-26	3.38261e-25	-28.9111	2.58763e-23	2.2762e-22	0.22	0.0098	0.22989	TRUE	TRUE
TMEFF1	-10.429	5.51859e-26	5.52461e-25	-4.41677	2.24534e-08	8.72095e-08	0.1928	0.031	0.320276	TRUE	TRUE
PRC1	-29.6342	6.23943e-26	6.2277e-25	-29.563	1.88705e-69	5.80571e-68	0.1808	0.047	0.363846	TRUE	TRUE
MPHOSPH10	-30	6.21157e-25	6.00393e-24	-29.8502	8.35295e-48	1.80826e-46	0.185	0.039	0.344541	TRUE	TRUE
ECE2	-30	6.24817e-25	6.01826e-24	-29.7613	7.55414e-31	1.03805e-29	0.212	0.025	0.29679	TRUE	TRUE
RBM27	-30	6.35059e-25	6.0628e-24	-29.9563	6.73615e-25	7.25982e-24	0.2279	0.013	0.246718	TRUE	TRUE
ATF7IP	-29.8623	1.0074e-24	8.97231e-24	-7.44748	7.11115e-08	2.63186e-07	0.2121	0.022	0.287868	TRUE	TRUE
APC2	-29.8533	1.07118e-24	9.46519e-24	-9.89516	0.000662246	0.00156402	0.1912	0.024	0.293718	TRUE	TRUE
SEC16A	-29.721	1.77582e-24	1.47246e-23	-29.2622	8.22931e-24	7.42183e-23	0.1948	0.034	0.328056	TRUE	TRUE
NAA50	-29.6396	2.31909e-24	1.88877e-23	-14.5931	5.20414e-07	1.78585e-06	0.2436	0.0098	0.22989	TRUE	TRUE
MYLK3	-29.4458	4.4157e-24	3.47031e-23	-8.65709	2.49191e-06	7.93032e-06	0.1783	0.042	0.352698	TRUE	TRUE
PLK1	-29.4155	4.84994e-24	3.79386e-23	-7.14931	6.51124e-07	2.21071e-06	0.2472	0.0058	0.207157	TRUE	TRUE
CSNK1A1L	-6.30087	2.27358e-23	1.75537e-22	-3.89426	3.22595e-06	1.01321e-05	0.2177	0.011	0.237463	TRUE	TRUE
INPP5A	-7.29311	2.80703e-23	2.16392e-22	-4.73314	8.78483e-14	4.9251e-13	0.1986	0.022	0.287868	TRUE	TRUE
PSMD10	-14.9014	5.57526e-23	4.25889e-22	-29.6631	2.59114e-39	4.70435e-38	0.2301	0.015	0.257116	TRUE	TRUE
ADAM9	-9.75655	5.82161e-23	4.44371e-22	-3.51817	1.36194e-05	3.97756e-05	0.2351	0.0068	0.214355	TRUE	TRUE
ZNF674	-7.57905	1.6047e-22	1.21752e-21	-7.63457	1.13804e-23	1.01828e-22	0.2372	0.0083	0.226839	TRUE	TRUE
HLTF	-9.94175	7.07357e-22	5.28345e-21	-14.4329	2.89265e-43	5.65448e-42	0.2015	0.019	0.277888	TRUE	TRUE
NRK	-7.21959	2.39626e-19	1.66533e-18	-3.33031	2.57715e-05	7.27979e-05	0.1794	0.041	0.35085	TRUE	TRUE
PANX1	-5.40256	2.84363e-18	1.92714e-17	-29.8945	0	0	0.2158	0.026	0.3001	TRUE	TRUE
KIAA0513	-7.04495	5.68358e-18	3.8159e-17	-4.06216	1.99361e-05	5.69973e-05	0.19	0.036	0.33418	TRUE	TRUE
KDM6A	-6.06399	8.46253e-18	5.66658e-17	-5.34962	5.4253e-15	3.22702e-14	0.2025	0.021	0.285093	TRUE	TRUE
VDAC1	-12.6182	1.85751e-17	1.23398e-16	-10.0007	1.70569e-16	1.09994e-15	0.2752	0.0016	0.148773	TRUE	TRUE
ENAH	-8.24313	9.92905e-17	6.44335e-16	-6.47772	3.88258e-13	2.09582e-12	0.2107	0.024	0.293718	TRUE	TRUE
XPOT	-10.4146	5.74677e-16	3.64721e-15	-7.58195	2.07946e-10	9.47974e-10	0.2842	0.0021	0.159203	TRUE	TRUE
ATG12	-12.3914	6.16501e-16	3.90528e-15	-16.199	3.10243e-20	2.41298e-19	0.2455	0.0061	0.207625	TRUE	TRUE
KIF23	-11.7435	9.83992e-16	6.18273e-15	-9.87482	2.17167e-15	1.31745e-14	0.2084	0.022	0.287868	TRUE	TRUE
HPSE	-9.52273	7.59236e-15	4.6433e-14	-10.7213	2.50932e-19	1.87801e-18	0.1642	0.049	0.370707	TRUE	TRUE
CLCN5	-5.01117	2.3408e-14	1.40434e-13	-5.56075	3.09571e-19	2.31133e-18	0.1771	0.035	0.331932	TRUE	TRUE
RAD1	-10.9562	8.24449e-14	4.85386e-13	-5.32542	8.50349e-08	3.12036e-07	0.205	0.016	0.263146	TRUE	TRUE
PCDHGA11	-5.91646	1.30205e-13	7.6168e-13	-6.484	7.42001e-22	6.2329e-21	0.3192	0.00046	0.130257	TRUE	TRUE
PCDHA8	-5.45631	3.61511e-13	2.08696e-12	-6.38696	1.2528e-21	1.0391e-20	0.183	0.043	0.355889	TRUE	TRUE
PPAT	-5.39933	8.31129e-13	4.70119e-12	-4.68902	1.6974e-09	7.23627e-09	0.1971	0.037	0.33781	TRUE	TRUE
PAPD7	-4.89895	4.18806e-12	2.28565e-11	-9.27324	5.79567e-40	1.06461e-38	0.1638	0.047	0.363846	TRUE	TRUE
YWHAB	-6.4687	2.85863e-11	1.49774e-10	-10.0601	5.9179e-19	4.35595e-18	0.2318	0.014	0.251095	TRUE	TRUE
LIMCH1	-5.59414	3.62309e-11	1.89041e-10	-4.44424	4.54452e-09	1.86852e-08	0.2272	0.012	0.242095	TRUE	TRUE
DIP2B	-8.08743	6.40052e-11	3.30372e-10	-5.63047	1.09968e-06	3.6416e-06	0.2944	0.0026	0.165826	TRUE	TRUE
BRWD3	-18.4655	2.16174e-10	1.08799e-09	-9.20932	6.95898e-13	3.6677e-12	0.2136	0.016	0.263146	TRUE	TRUE
SCARB2	-5.95672	2.29714e-10	1.15383e-09	-4.89452	3.48123e-08	1.32493e-07	0.2027	0.02	0.281863	TRUE	TRUE
CLIC4	-4.5768	2.76743e-10	1.38454e-09	-8.17478	5.70893e-38	1.00579e-36	0.22	0.016	0.263146	TRUE	TRUE
EIF4G2	-18.2281	3.7472e-10	1.86823e-09	-29.752	1.43554e-24	1.40637e-23	0.2063	0.032	0.322988	TRUE	TRUE
PCDHGA3	-4.419	1.50817e-09	7.25749e-09	-6.55232	3.69354e-19	2.75111e-18	0.233	0.014	0.251095	TRUE	TRUE
PCDHGC5	-5.03858	4.03141e-09	1.89478e-08	-6.27737	6.56449e-19	4.81203e-18	0.1963	0.026	0.3001	TRUE	TRUE
PCDHGA1	-5.25596	4.94678e-09	2.30781e-08	-6.06311	7.60202e-17	5.02417e-16	0.1753	0.037	0.33781	TRUE	TRUE
ZNF611	-5.37462	9.49452e-09	4.32547e-08	-4.72379	2.21312e-08	8.60382e-08	0.2518	0.0059	0.207625	TRUE	TRUE
YTHDF3	-5.48794	1.08888e-08	4.94727e-08	-4.53934	3.68548e-08	1.40053e-07	0.2018	0.024	0.293718	TRUE	TRUE
PCDHGA12	-5.29028	1.17947e-08	5.33721e-08	-6.34833	1.23892e-18	8.94009e-18	0.2427	0.0052	0.198052	TRUE	TRUE
PAK6	-5.38825	1.20995e-08	5.46781e-08	-10.1333	2.36404e-38	4.18853e-37	0.203	0.019	0.277888	TRUE	TRUE
BEND3	-10.8571	1.30649e-08	5.87774e-08	-5.04166	5.84396e-06	1.78128e-05	0.2633	0.0037	0.180595	TRUE	TRUE
PROM2	-4.37492	3.45064e-08	1.51657e-07	-4.43901	6.45672e-09	2.62194e-08	0.2952	0.0017	0.152123	TRUE	TRUE
RNF152	-5.37196	3.77877e-08	1.65502e-07	-4.18561	4.30457e-07	1.4886e-06	0.1856	0.023	0.291555	TRUE	TRUE
ACSL1	-9.36864	5.42287e-08	2.34055e-07	-5.03188	0.00039	0.000949423	0.2138	0.014	0.251095	TRUE	TRUE
RAP1GAP2	-4.69362	5.75742e-08	2.47769e-07	-29.8806	6.96625e-212	8.53092e-210	0.1666	0.046	0.361314	TRUE	TRUE
PCDHGA2	-5.03242	1.32601e-07	5.56837e-07	-6.49232	2.26667e-17	1.53541e-16	0.2564	0.0061	0.207625	TRUE	TRUE
QRSL1	-15.267	1.52538e-07	6.36582e-07	-29.5262	3.06801e-24	2.8706e-23	0.2305	0.011	0.237463	TRUE	TRUE
TMEM41A	-5.45978	2.30217e-07	9.45126e-07	-4.55887	5.83639e-11	2.73863e-10	0.2094	0.023	0.291555	TRUE	TRUE
TAF1L	-4.63111	2.90295e-07	1.18215e-06	-4.0348	5.89331e-07	2.0102e-06	0.1705	0.044	0.356368	TRUE	TRUE
PCDHGA6	-4.70126	4.01214e-07	1.61623e-06	-6.30804	1.16242e-16	7.59401e-16	0.1973	0.031	0.320276	TRUE	TRUE
REPS1	-4.56392	5.5347e-07	2.20231e-06	-3.7546	8.56266e-06	2.55204e-05	0.227	0.014	0.251095	TRUE	TRUE
COPS5	-14.2333	9.13548e-07	3.56895e-06	-17.0714	4.27993e-09	1.76554e-08	0.226	0.015	0.257116	TRUE	TRUE
ASAP1	-4.05563	1.14966e-06	4.45004e-06	-3.70066	1.05861e-05	3.12972e-05	0.1655	0.048	0.367485	TRUE	TRUE
LRP11	-5.42194	1.29204e-06	4.98202e-06	-10.4845	1.35192e-12	7.00118e-12	0.2551	0.0064	0.20805	TRUE	TRUE
PHACTR2	-3.96159	1.83929e-06	6.98541e-06	-4.17005	5.40399e-06	1.65525e-05	0.2107	0.017	0.268962	TRUE	TRUE
RFX8	-5.4687	1.89203e-06	7.17493e-06	-9.97572	6.68668e-14	3.7708e-13	0.1988	0.031	0.320276	TRUE	TRUE
ETFA	-4.93196	2.08883e-06	7.89451e-06	-4.05677	2.02259e-06	6.50133e-06	0.2925	0.0017	0.152123	TRUE	TRUE
TJP1	-5.08181	3.39505e-06	1.25861e-05	-4.45426	7.10095e-06	2.14194e-05	0.18589	0.043	0.355889	TRUE	TRUE
KIF4B	-4.3026	3.52379e-06	1.30538e-05	-9.90802	5.14904e-43	1.00026e-41	0.2839	0.00082	0.13513	TRUE	TRUE
BAMBI	-5.04122	3.97945e-06	1.46664e-05	-4.02987	9.03686e-05	0.000239354	0.2057	0.017	0.268962	TRUE	TRUE
ATG5	-4.57752	4.61654e-06	1.69279e-05	-4.16971	8.33917e-06	2.49138e-05	0.2018	0.032	0.322988	TRUE	TRUE
TMED7-TICAM2	-4.55905	4.67469e-06	1.71287e-05	-8.22683	5.9451e-31	8.20555e-30	0.27813	0.0024	0.163043	TRUE	TRUE
LACE1	-5.10471	1.20915e-05	4.2337e-05	-10.2665	5.03831e-33	7.53694e-32	0.3229	0.00046	0.130257	TRUE	TRUE
HSP90AA1	-4.8159	1.4851e-05	5.14635e-05	-4.39129	1.84399e-05	5.29989e-05	0.3178	0.00074	0.132436	TRUE	TRUE
BAGE2	-4.21263	1.73137e-05	5.95476e-05	-9.11738	1.25754e-25	1.40374e-24	0.19737	0.021	0.285093	TRUE	TRUE
PELO	-12.3478	2.20609e-05	7.50307e-05	-13.9933	1.50571e-06	4.89533e-06	0.3399	0.00016	0.118119	TRUE	TRUE
MAGT1	-7.19626	2.34193e-05	7.93832e-05	-4.41025	0.000457421	0.00110345	0.2202	0.01	0.22989	TRUE	TRUE
RALA	-4.15919	2.57669e-05	8.69611e-05	-5.08477	3.28334e-11	1.56714e-10	0.2197	0.019	0.277888	TRUE	TRUE
CD163L1	-4.3621	3.22955e-05	0.00010827	-8.32423	4.05428e-26	4.60801e-25	0.1855	0.026	0.3001	TRUE	TRUE
YME1L1	-4.4325	3.50258e-05	0.000116841	-3.51208	0.00151992	0.0034344	0.2167	0.011	0.237463	TRUE	TRUE
DYRK2	-5.14584	7.36513e-05	0.000236317	-3.79169	0.00138393	0.00313903	0.28	0.0022	0.159203	TRUE	TRUE
CBX5	-4.3254	0.000161622	0.000491245	-8.72759	7.56104e-27	8.85145e-26	0.2008	0.027	0.302822	TRUE	TRUE
LSMEM1	-3.8748	0.000170524	0.000516123	-10.2062	2.9447e-33	4.44768e-32	0.1699	0.048	0.367485	TRUE	TRUE
CEP57L1	-3.35468	0.00022184	0.000660352	-11.7961	5.72581e-34	8.82977e-33	0.1926	0.031	0.320276	TRUE	TRUE
YIPF6	-10.5856	0.000274075	0.000803747	-9.16349	0.00162734	0.00366916	0.2438	0.0054	0.201972	TRUE	TRUE
KLHL8	-3.60112	0.00038808	0.00111317	-3.91544	4.2784e-05	0.00011779	0.1924	0.033	0.325001	TRUE	TRUE
AAK1	-4.19118	0.000473465	0.00134056	-11.3415	7.73485e-31	1.05939e-29	0.2223	0.013	0.246718	TRUE	TRUE
SLC31A1	-4.1779	0.000480054	0.00135617	-8.12117	1.90973e-15	1.1625e-14	0.2153	0.017	0.268962	TRUE	TRUE
ZNF347	-3.73694	0.00064499	0.00178366	-4.75588	7.95632e-10	3.48833e-09	0.2455	0.0066	0.211658	TRUE	TRUE
EIF4G1	-3.60685	0.000767901	0.00209599	-9.17889	2.45025e-28	3.06982e-27	0.2509	0.0047	0.190333	TRUE	TRUE
KCTD15	-4.10117	0.00092675	0.00249092	-6.77981	1.86565e-15	1.13844e-14	0.218	0.011	0.237463	TRUE	TRUE
PARPBP	-3.14949	0.00385919	0.00936808	-8.40385	1.60768e-20	1.26697e-19	0.2147	0.011	0.237463	TRUE	TRUE
IL27	-30	6.39608e-25	6.0947e-24	-2.92447	0.0257455	0.0483445	0.1948	0.027	0.302822	TRUE	TRUE
