# Supplementary material for: An In Vivo CRISPR Screen Identifies Stepwise Genetic Dependencies of Metastatic Progression
Source: Oxford University Press journal article supplement (doi:10.1158/0008-5472.can-21-3908), 2021-12-16
Supplement: can-21-3908_table_s9_supps9.xlsx [file can-21-3908_table_s9_supps9.xlsx]

## Sheet: Minipool intravasation Library
Table S9. Minipool intravasation library consisting of 9 hit genes each targeted by 6 sgRNAs as well as 50 non-targeting control sgRNAs leading to a total complexity of 104 sgRNAs.
Number	Gene	UID	Sequence
1	IL27	HGLibA_23111	TCGTCTTATCTCGGGCCGTG
2	IL27	HGLibA_23112	GACTTACAAAGCGGTGGGCC
3	IL27	HGLibA_23113	TGGACCTCCGCGATCTGCAG
4	IL27	HGLibB_23080	AAGCTGCTCTCCGAGGTTCG
5	IL27	HGLibB_23081	CCGAGATAAGACGAGCTCCA
6	IL27	HGLibB_23082	CGGGCTCTACCTGGAAGCGG
7	PCDHGA1	HGLibA_35516	ATGGGATTGAGCGCCCGCTA
8	PCDHGA1	HGLibA_35517	TGTCCCCGAAAACGTGCCGC
9	PCDHGA1	HGLibA_35518	GTAGACATTCTGGCGGTAGT
10	PCDHGA1	HGLibB_35469	TCTCATTGCTGTCCAAGTCG
11	PCDHGA1	HGLibB_35470	ACTGGCGGACGCCAAGATCA
12	PCDHGA1	HGLibB_35471	TGCCGGTGTCATCGCCATTT
13	PCDHGA2	HGLibA_35528	CGTGACGATAACCTTCGCTC
14	PCDHGA2	HGLibA_35529	ATGGGATTGAGCGCCCGCTA
15	PCDHGA2	HGLibA_35530	GTGCCCACGAGCGTATTCTC
16	PCDHGA2	HGLibB_35481	GTAGACATTCTGGCGGTAGT
17	PCDHGA2	HGLibB_35482	ACTGGCGGACGCCAAGATCA
18	PCDHGA2	HGLibB_35483	TGCCGGTGTCATCGCCATTT
19	PLK1	HGLibA_37184	CTCCCCGTCATATTCGACTT
20	PLK1	HGLibA_37185	AGCCAAGCACAATTTGCCGT
21	PLK1	HGLibA_37186	TACCTACGGCAAATTGTGCT
22	PLK1	HGLibB_37136	GTCATTAAGCAGCTCGTTAA
23	PLK1	HGLibB_37137	CAACCAAAGTCGAATATGAC
24	PLK1	HGLibB_37138	GCCTAAAAGAGACCTACCTC
25	HPSE	HGLibA_22060	CGTCACCATTGACGCCAACC
26	HPSE	HGLibA_22061	ACGGTTGGAATGGCCCTACC
27	HPSE	HGLibA_22062	TTCTCCAAAGCTTCGTACCT
28	HPSE	HGLibB_22031	ACGACGTCCTGTGCTTGCGC
29	HPSE	HGLibB_22032	CTCGGAGTAGCAATTGCTCC
30	HPSE	HGLibB_22033	CCTTCTTGGGATCGAAAATT
31	PANX1	HGLibA_35108	ACTGTTAGCGTGTATCTACC
32	PANX1	HGLibA_35109	GCTGCGAAACGCCAGAACAG
33	PANX1	HGLibA_35110	CCAGGTGTTACCGAGAACTT
34	PANX1	HGLibB_35062	GAATGCCCGACAGAGACTTC
35	PANX1	HGLibB_35063	GCACGGTGCTGTCGTTTCTC
36	PANX1	HGLibB_35064	AACTCACTGCAGAGCGAGTC
37	PAK6	HGLibA_35051	CGCCCCCCACGGGCACCAAT
38	PAK6	HGLibA_35052	CTACCAGCACTTCAACGTGG
39	PAK6	HGLibA_35053	CTGGTATCCGAAGTGGTCAG
40	PAK6	HGLibB_35005	TTCGGAATAGCCTGCGCTTC
41	PAK6	HGLibB_35006	CAGCGGGATCCCCCCGCACC
42	PAK6	HGLibB_35007	CAGACATCGTCTCCCAAGTC
43	BAMBI	HGLibA_04136	TGCCCCAGTGAACAAGCGAG
44	BAMBI	HGLibA_04137	GTCATTGCCGTGCCCATTGC
45	BAMBI	HGLibA_04138	TGGCACCACCATACCCACAT
46	BAMBI	HGLibB_04134	GCTGCCCACTGTGTAGCCAC
47	BAMBI	HGLibB_04135	CAGCCAGATGAAGATGTAGC
48	BAMBI	HGLibB_04136	ACTCCAGCTACATCTTCATC
49	IYD	HGLibA_23888	ATCAGTGTTTCCATCGCTTG
50	IYD	HGLibA_23889	CACTGATCTCATTGTAGTAG
51	IYD	HGLibA_23890	CTTCACAACCACGAAGGTCC
52	IYD	HGLibB_23854	CGAATCTTGTGCTTCACGTC
53	IYD	HGLibB_23855	AAGTAATGAGCAAGTCCCAA
54	IYD	HGLibB_23856	TCATAACCACTATCCTGAGA
55	NonTargetingControlGuideForHuman_0001	HGLibA_64384	ACGGAGGCTAAGCGTCGCAA
56	NonTargetingControlGuideForHuman_0002	HGLibA_64385	CGCTTCCGCGGCCCGTTCAA
57	NonTargetingControlGuideForHuman_0003	HGLibA_64386	ATCGTTTCCGCTTAACGGCG
58	NonTargetingControlGuideForHuman_0004	HGLibA_64387	GTAGGCGCGCCGCTCTCTAC
59	NonTargetingControlGuideForHuman_0005	HGLibA_64388	CCATATCGGGGCGAGACATG
60	NonTargetingControlGuideForHuman_0006	HGLibA_64389	TACTAACGCCGCTCCTACAG
61	NonTargetingControlGuideForHuman_0007	HGLibA_64390	TGAGGATCATGTCGAGCGCC
62	NonTargetingControlGuideForHuman_0008	HGLibA_64391	GGGCCCGCATAGGATATCGC
63	NonTargetingControlGuideForHuman_0009	HGLibA_64392	TAGACAACCGCGGAGAATGC
64	NonTargetingControlGuideForHuman_0010	HGLibA_64393	ACGGGCGGCTATCGCTGACT
65	NonTargetingControlGuideForHuman_0011	HGLibA_64394	CGCGGAAATTTTACCGACGA
66	NonTargetingControlGuideForHuman_0012	HGLibA_64395	CTTACAATCGTCGGTCCAAT
67	NonTargetingControlGuideForHuman_0013	HGLibA_64396	GCGTGCGTCCCGGGTTACCC
68	NonTargetingControlGuideForHuman_0014	HGLibA_64397	CGGAGTAACAAGCGGACGGA
69	NonTargetingControlGuideForHuman_0015	HGLibA_64398	CGAGTGTTATACGCACCGTT
70	NonTargetingControlGuideForHuman_0016	HGLibA_64399	CGACTAACCGGAAACTTTTT
71	NonTargetingControlGuideForHuman_0017	HGLibA_64400	CAACGGGTTCTCCCGGCTAC
72	NonTargetingControlGuideForHuman_0018	HGLibA_64401	CAGGAGTCGCCGATACGCGT
73	NonTargetingControlGuideForHuman_0019	HGLibA_64402	TTCACGTCGTCTCGCGACCA
74	NonTargetingControlGuideForHuman_0020	HGLibA_64403	GTGTCGGATTCCGCCGCTTA
75	NonTargetingControlGuideForHuman_0021	HGLibA_64404	CACGAACTCACACCGCGCGA
76	NonTargetingControlGuideForHuman_0022	HGLibA_64405	CGCTAGTACGCTCCTCTATA
77	NonTargetingControlGuideForHuman_0023	HGLibA_64406	TCGCGCTTGGGTTATACGCT
78	NonTargetingControlGuideForHuman_0024	HGLibA_64407	CTATCTCGAGTGGTAATGCG
79	NonTargetingControlGuideForHuman_0025	HGLibA_64408	AATCGACTCGAACTTCGTGT
80	NonTargetingControlGuideForHuman_0026	HGLibA_64409	CCCGATGGACTATACCGAAC
81	NonTargetingControlGuideForHuman_0027	HGLibA_64410	ACGTTCGAGTACGACCAGCT
82	NonTargetingControlGuideForHuman_0028	HGLibA_64411	CGCGACGACTCAACCTAGTC
83	NonTargetingControlGuideForHuman_0029	HGLibA_64412	GGTCACCGATCGAGAGCTAG
84	NonTargetingControlGuideForHuman_0030	HGLibA_64413	CTCAACCGACCGTATGGTCA
85	NonTargetingControlGuideForHuman_0031	HGLibA_64414	CGTATTCGACTCTCAACGCG
86	NonTargetingControlGuideForHuman_0032	HGLibA_64415	CTAGCCGCCCAGATCGAGCC
87	NonTargetingControlGuideForHuman_0033	HGLibA_64416	GAATCGACCGACACTAATGT
88	NonTargetingControlGuideForHuman_0034	HGLibA_64417	ACTTCAGTTCGGCGTAGTCA
89	NonTargetingControlGuideForHuman_0035	HGLibA_64418	GTGCGATGTCGCTTCAACGT
90	NonTargetingControlGuideForHuman_0036	HGLibA_64419	CGCCTAATTTCCGGATCAAT
91	NonTargetingControlGuideForHuman_0037	HGLibA_64420	CGTGGCCGGAACCGTCATAG
92	NonTargetingControlGuideForHuman_0038	HGLibA_64421	ACCCTCCGAATCGTAACGGA
93	NonTargetingControlGuideForHuman_0039	HGLibA_64422	AAACGGTACGACAGCGTGTG
94	NonTargetingControlGuideForHuman_0040	HGLibA_64423	ACATAGTCGACGGCTCGATT
95	NonTargetingControlGuideForHuman_0041	HGLibA_64424	GATGGCGCTTCAGTCGTCGG
96	NonTargetingControlGuideForHuman_0042	HGLibA_64425	ATAATCCGGAAACGCTCGAC
97	NonTargetingControlGuideForHuman_0043	HGLibA_64426	CGCCGGGCTGACAATTAACG
98	NonTargetingControlGuideForHuman_0044	HGLibA_64427	CGTCGCCATATGCCGGTGGC
99	NonTargetingControlGuideForHuman_0045	HGLibA_64428	CGGGCCTATAACACCATCGA
100	NonTargetingControlGuideForHuman_0046	HGLibA_64429	CGCCGTTCCGAGATACTTGA
101	NonTargetingControlGuideForHuman_0047	HGLibA_64430	CGGGACGTCGCGAAAATGTA
102	NonTargetingControlGuideForHuman_0048	HGLibA_64431	TCGGCATACGGGACACACGC
103	NonTargetingControlGuideForHuman_0049	HGLibA_64432	AGCTCCATCGCCGCGATAAT
104	NonTargetingControlGuideForHuman_0050	HGLibA_64433	ATCGTATCATCAGCTAGCGC
