# Supplementary material for: An In Vivo CRISPR Screen Identifies Stepwise Genetic Dependencies of Metastatic Progression
Source: Oxford University Press journal article supplement (doi:10.1158/0008-5472.can-21-3908), 2021-12-16
Supplement: can-21-3908_table_s10_supps10.xlsx [file can-21-3908_table_s10_supps10.xlsx]

## Sheet: Bone
Table S10. Genes that are selectively depleted in specific metastatic sites of CRISPR-CDX-BR16 mice. The table shows the genes whose sgRNA specifically dropped out in bone, brain, liver and lymphnode of CRISPR-CDX-BR16 mice.
gene	mean_log2fc
AJUBA	-4.54075
ALG12	-3.47524
ALG9	-6.29685
AMZ1	-7.68409
ARID3B	-6.677
ATP1A1	-7.58029
B4GALNT4	-7.89135
C12orf77	-7.11941
CCDC132	-7.25746
CCL19	-3.71758
ECE1	-8.47673
FILIP1L	-7.15079
GABRG3	-6.79743
HNF4G	-6.2946
hsa-mir-103a-2	-6.41918
hsa-mir-103b-2	-6.4542
hsa-mir-4441	-7.78785
hsa-mir-4661	-6.9265
hsa-mir-5197	-6.29702
IFNA8	-7.52997
KLF16	-5.05816
KLF2	-6.1802
LOC728819	-6.70823
MAP3K14	-5.99995
MARCH7	-6.25559
METAP1	-8.01197
NFKB2	-6.42729
OR2A5	-8.30187
OR2B3	-3.78252
PCDHGB2	-6.42016
PGPEP1	-7.80346
PLCXD1_X	-6.25249
PLCXD1_Y	-6.02889
R3HDM2	-8.37586
RAB9A	-5.80083
RALA	-6.59482
RBM43	-1.94224
RNASE13	-2.25948
RUNX2	-7.27165
SCUBE3	-6.37221
SEC24B	-6.44992
SH3GLB2	-2.76503
SMIM6	-7.62204
SMPD1	-5.36804
SNTN	-6.66801
SUSD3	-6.32015
TAP2	-6.3247
TAS2R42	-3.09157
TCTN2	-7.04917
TMC5	-8.16191
TMEM232	-6.98635
TMLHE	-7.65257
TTLL12	-7.88106
TXNDC15	-6.53021
UBL4A	-7.31022
UGT1A10	-5.76119
UGT1A3	-5.84895
UGT1A4	-6.0831
UGT1A5	-6.06365
UGT1A6	-5.82738
UGT1A7	-5.75469
UGT1A8	-5.99409
UGT1A9	-5.57799
USP17L26	-5.67972
USP17L29	-5.71287
WFIKKN2	-6.70187
XRCC1	-6.61298
YAP1	-7.43835

## Sheet: Brain
Table S10. Genes that are selectively depleted in specific metastatic sites of CRISPR-CDX-BR16 mice. The table shows the genes whose sgRNA specifically dropped out in bone, brain, liver and lymphnode of CRISPR-CDX-BR16 mice.
gene	mean_log2fc
ABLIM1	-6.48085
AGL	-7.19094
AGPAT4	-7.9429
AKAP7	-7.07105
AMZ1	-7.76897
ANKRD13D	-7.36098
AP1B1	-7.16494
AP1G1	-9.64072
ARAP1	-3.95917
AZGP1	-7.73484
BCMO1	-6.30185
BIN3	-8.31563
BTG1	-9.4034
C1orf186	-8.69509
C1S	-7.86327
C3orf37	-6.12077
C6	-6.77367
CACNA1A	-9.23751
CCDC132	-3.19629
CCDC25	-6.64212
CCL18	-6.61673
CCL19	-7.58689
CD81	-6.90553
CDKN2A	-8.11561
CETP	-7.78955
CMTM7	-7.83439
CXorf65	-8.22739
DCST1	-8.4236
DENND1A	-8.62198
DENND2D	-8.24164
DNASE1L3	-8.31812
DPP10	-6.47418
DUSP15	-7.11511
ECE1	-8.24414
EIF3CL	-4.66824
FAM114A2	-7.2175
FAM25A	-7.6447
FAM92A1	-8.10958
FILIP1L	-7.12449
FKBP2	-8.25225
FOXJ3	-7.8561
GABRG3	-3.5438
GDPD4	-5.9549
GLYATL3	-7.48321
GPR113	-8.2047
HAPLN4	-8.16547
HDAC4	-7.41023
HHIP	-8.24348
HOXC11	-6.86964
HPCA	-8.33129
hsa-mir-1265	-6.77216
hsa-mir-3170	-7.9731
hsa-mir-3689d-2	-6.31865
hsa-mir-4441	-7.84353
hsa-mir-4661	-7.08858
hsa-mir-5197	-6.29012
hsa-mir-8058	-7.91741
IFNA1	-7.23404
IFNA8	-7.73348
IRF9	-5.86949
ITGB8	-7.84836
IVL	-7.86272
JUN	-9.36427
KCND2	-8.13464
KCNH8	-6.20008
KCNN4	-7.04119
KLF16	-7.62414
KLF2	-6.97301
LANCL3	-6.28397
MAML2	-9.62776
MAP3K14	-7.055
METAP1	-8.33795
MFF	-7.50379
MMD2	-7.64222
MON1B	-8.22169
MPHOSPH6	-6.84474
MT3	-6.66796
MTERF	-7.12926
NIF3L1	-9.20316
OR13C4	-6.29034
OR2A5	-8.06424
OR4E2	-8.03374
OR52E6	-6.52533
OR52I1	-7.64471
OR5AS1	-8.24652
OR5B17	-6.15066
OR6Y1	-6.78525
OR7G1	-6.78396
PANX3	-6.3073
PATE3	-6.74098
PCDHA11	-6.51972
PCDHA12	-6.8471
PCDHA13	-6.5423
PCDHA3	-6.43674
PCDHA4	-7.76409
PCDHA5	-6.38199
PCDHA6	-6.62459
PCDHA9	-6.43828
PCDHAC1	-6.4715
PCDHGA10	-6.47156
PCDHGA12	-6.72637
PCDHGA5	-6.47775
PCDHGA8	-5.64244
PCDHGB1	-6.02694
PCDHGB2	-6.86761
PCDHGB6	-7.30002
PCDHGB7	-5.59789
PCDHGC4	-5.92198
PGF	-7.24995
PGPEP1	0.0102988
PPP1R3D	-7.13804
PTH2R	-2.71856
R3HDM2	-8.21659
RAB3GAP1	-8.16396
RAB5A	-8.20238
RALA	-6.48444
RCE1	-8.0528
RFXANK	-6.35283
RHOA	-8.12632
RHOC	-6.65859
RMND5A	-2.15166
RNASE13	-6.36557
RNASE2	-7.01479
RND3	-6.69575
S100A3	-9.05981
S1PR1	-5.93557
SCARF2	-6.01511
SCUBE3	-6.81523
SESN1	-6.57662
SH3GLB2	-6.02243
SHPK	-7.5716
SLC52A3	-7.96179
SLC5A1	-4.88121
SLC7A2	-6.50034
SLCO1B3	-8.40271
SMG9	-7.12397
SMIM6	-7.70525
SMPD1	-5.95106
SMPD3	-7.22034
SP110	-7.32217
STAT2	-7.95068
SULT4A1	-6.88105
SUSD3	-6.44073
TADA1	-6.83479
TAP2	-6.9026
TAS2R7	-7.88304
TCP11	-7.24813
TLDC2	-2.26109
TMEM200C	-6.91133
TMSB15B	-7.36664
TRIM64	-6.95588
TRIP12	-5.60969
TROAP	-6.87053
TRPM4	-8.78447
TTLL12	-7.97248
TUBGCP2	-7.40705
TXNDC15	-6.79674
UBL4A	-7.05846
UBR2	-6.70639
USP1	-7.71245
USP17L24	-2.65481
USP17L25	-2.82189
USP17L27	-2.61908
USP17L28	-2.54029
USP17L30	-2.97378
USP17L5	-2.41409
WFS1	-7.44343
WRAP73	-7.92339
XAGE1A	-6.15558
XAGE1B	-6.06862
XAGE1C	-6.10179
XAGE1D	-5.70572
XAGE1E	-5.82588
XRCC1	-6.68722
ZBED6CL	-7.68893
ZNF317	-7.46741
ZNF391	-8.01062
ZNF486	-8.0759
ZNF691	-6.96958
ZNF85	-6.75999

## Sheet: Liver
Table S10. Genes that are selectively depleted in specific metastatic sites of CRISPR-CDX-BR16 mice. The table shows the genes whose sgRNA specifically dropped out in bone, brain, liver and lymphnode of CRISPR-CDX-BR16 mice.
gene	mean_log2fc
ACSM3	-9.04773
AHRR	-6.42095
AJUBA	-5.9919
ALDH1A3	-8.34606
BTG1	-0.41119
C1QL1	-4.46257
C1QTNF3	-1.33964
C22orf46	-8.49212
CAPN10	-8.67439
CD244	-6.88686
CHCHD6	-1.59711
CTTNBP2NL	-0.0748152
DCHS1	-5.43064
DNASE1L3	-6.40624
DUSP15	-7.15939
FANCI	-1.97739
GPR113	-3.08125
HOXA3	-8.06225
HPCA	-7.97223
hsa-mir-103a-2	-5.83039
hsa-mir-103b-2	-5.97127
hsa-mir-516b-1	-8.55822
KCNH8	-6.52632
KCNN4	-5.22747
LOC728819	-6.90798
LSM14B	-3.41224
MGMT	-8.09983
RAB5A	-8.01752
RASAL2	-8.33237
RHOA	-2.76222
RHOC	-1.59322
RNASE2	-2.9265
SHPK	-7.82212
SLC7A2	-6.80923
SMARCC2	-2.04361
SVOPL	-6.05099
SYTL3	-1.24604
TCTN2	-0.504959
TMEM232	-0.012731
TMTC1	-8.27809
TXNDC15	-3.15991
UBR2	-1.72269
UQCC	-6.45286
UQCC1	-6.51342
USP17L20	-1.14716

## Sheet: Lymphnode
Table S10. Genes that are selectively depleted in specific metastatic sites of CRISPR-CDX-BR16 mice. The table shows the genes whose sgRNA specifically dropped out in bone, brain, liver and lymphnode of CRISPR-CDX-BR16 mice.
gene	mean_log2fc
ABLIM1	-6.76266
AGPAT4	-8.04484
ALDH1A3	-8.42564
ANKFY1	-4.91429
AP1B1	-3.3522
AP1G1	-9.81563
ARID3B	-6.60306
ATF7IP	-6.07942
B4GALNT4	-7.57419
BAMBI	-8.4972
C16orf78	-9.00993
C1QTNF3	-6.26388
C20orf111	-5.52823
C22orf46	-7.24993
C2orf44	-6.83639
CACNA1A	-9.239
CAPN10	-8.60224
CCDC25	-6.73436
CD81	-7.02901
CNGA3	-7.39065
CTU1	-2.92868
DCHS1	-7.6896
DNAJC16	-5.6339
DUSP15	-2.64134
FAM92A1	-8.39764
FOXJ3	-7.90346
GALNT5	-7.93149
GAS8	-7.3024
HIST1H2BD	-6.27694
HOXC11	-6.53353
hsa-mir-1265	-6.65873
hsa-mir-3689b	-1.86011
hsa-mir-4441	-7.80121
ITSN2	-9.1422
KCND2	-8.24284
KCNH8	-6.13877
KLF2	-6.94274
LOC728819	-3.07753
LYRM9	-8.20281
SEPT3	-6.47121
MMD2	-7.68759
NXN	-6.62165
OPLAH	-7.42703
OR2A5	-1.46733
OR2B3	-3.35805
OR52E6	-2.51817
OR5AS1	-8.06231
OR5B17	-7.67462
OR6Y1	-6.75706
PCDHGA5	-1.83763
PGPEP1	-7.8708
PLCXD1_X	-6.37152
PLCXD1_Y	-6.37653
PRKAG2	-8.32149
PTPRM	-6.2075
R3HDM2	-0.549031
RAB9A	-6.78795
RBPJ	-7.33893
RELA	-7.41576
RFXANK	-6.42042
RND3	-6.00872
RUNX2	-7.65668
S100A3	0.347101
SEMG2	-2.92201
SESN1	-7.04144
SHPK	-7.63583
SLC10A3	-7.62558
SMARCC2	-5.57099
SNTN	-5.92015
SRP68	-7.54499
STOML3	-8.23871
STRIP2	-7.85098
SYT4	-6.62938
TAS2R7	-5.34503
TBX5	-7.10621
TMTC1	-7.89938
TRIM64	-6.70425
TROAP	-6.66445
TSSC1	-7.87282
TTC3	-6.65063
TUBGCP2	-7.23483
UBL4A	-7.58536
UQCC	-6.06569
UQCC1	-5.71676
USP17L11	-5.67726
USP17L12	-4.89037
USP17L13	-5.63971
USP17L17	-5.39307
USP17L18	-5.51348
USP17L20	-5.69201
USP17L22	-5.58423
USP17L26	-7.05784
USP17L27	-7.03432
USP17L28	-7.03232
USP17L29	-7.02793
USP17L30	-7.28372
WFIKKN2	-6.76149
WFS1	-7.46242
