# Supplementary material for: An In Vivo CRISPR Screen Identifies Stepwise Genetic Dependencies of Metastatic Progression
Source: Oxford University Press journal article supplement (doi:10.1158/0008-5472.can-21-3908), 2021-12-16
Supplement: can-21-3908_table_s11_supps11.xlsx [file can-21-3908_table_s11_supps11.xlsx]

## Sheet: Bone
Table S11. Genes that are selectively depleted in specific metastatic sites of CRISPR-CDX-BR16 mice and expressed in the respective organ in the BR16-CDX model. The table shows the genes whose sgRNA specifically dropped out in bone, liver, brain and lymphnode in CRISPR-CDX-BR16 mice, while they are expressed at the RNA level in metastatic cells of the respective organ of BR16-CDX mice.
gene	is_exprs_prop	mean_exprs
MAP3K14	0.666667	9.4008
RALA	1	45.0847
XRCC1	0.666667	6.2293
ALG9	1	19.9448
TTLL12	0.666667	1.18275
UBL4A	0.666667	7.75257
TXNDC15	1	24.0312
ECE1	1	4.18483
RAB9A	0.666667	23.0699
KLF2	0.666667	1.0306
PGPEP1	1	3.43541
SEPT3	1	58.3732
SEC24B	1	1.4364
SCUBE3	0.666667	2.22926
SH3GLB2	1	21.0217
ATP1A1	1	23.3814
METAP1	0.666667	31.806
SMPD1	0.666667	1.25296
TCTN2	0.666667	5.2775
AMZ1	0.666667	6.11734
ARID3B	0.666667	2.06545
R3HDM2	1	12.5535
B4GALNT4	0.666667	6.64167
ALG12	0.666667	5.57046
TMLHE	0.666667	3.57805

## Sheet: Brain
Table S11. Genes that are selectively depleted in specific metastatic sites of CRISPR-CDX-BR16 mice and expressed in the respective organ in the BR16-CDX model. The table shows the genes whose sgRNA specifically dropped out in bone, liver, brain and lymphnode in CRISPR-CDX-BR16 mice, while they are expressed at the RNA level in metastatic cells of the respective organ of BR16-CDX mice.
gene	is_exprs_prop	mean_exprs
RALA	0.888889	53.4402
UBR2	0.777778	2.06175
AGPAT4	0.666667	2.06329
FAM114A2	0.555556	3.42797
RFXANK	1	78.6136
RHOA	0.888889	49.267
HDAC4	0.555556	2.07881
XRCC1	0.888889	6.06542
ABLIM1	1	14.4204
AP1B1	0.777778	3.81989
TTLL12	0.555556	1.87062
SLC52A3	0.888889	4.51429
UBL4A	0.888889	8.2407
SMPD3	0.555556	1.84711
MON1B	0.777778	2.32937
KCNN4	1	19.1766
ZNF85	0.888889	5.36664
SMG9	1	12.6652
ITGB8	0.888889	3.04706
WFS1	1	5.61311
CD81	1	25.346
TXNDC15	1	23.8476
RAB3GAP1	1	8.85623
RND3	0.888889	22.9768
WRAP73	1	9.03795
ECE1	0.888889	5.505
DENND1A	0.888889	4.6746
HOXC11	0.777778	2.97955
TRPM4	1	26.9499
TUBGCP2	1	19.4705
ZNF317	0.888889	4.28292
PPP1R3D	0.666667	2.10398
BTG1	1	24.6791
TROAP	1	17.4769
MPHOSPH6	1	28.1202
SP110	0.777778	5.82422
CACNA1A	1	6.01762
RAB5A	0.888889	9.54668
CCDC25	1	88.736
BIN3	1	10.2167
CDKN2A	1	26.0743
SH3GLB2	1	9.34744
TADA1	0.666667	3.78612
RMND5A	0.888889	11.8354
TRIP12	0.888889	11.5932
RHOC	1	35.4896
AZGP1	0.666667	2.37803
USP1	0.777778	9.58314
DENND2D	0.777778	13.9218
METAP1	0.777778	8.65376
SMPD1	0.555556	3.89701
AP1G1	0.888889	12.7609
MFF	1	20.3398
STAT2	1	17.7748
ANKRD13D	1	20.4254
FKBP2	1	33.2153
RCE1	1	7.84634
AMZ1	0.777778	2.22507
JUN	0.555556	4.78793
R3HDM2	1	28.2018
C1S	0.555556	2.7362
ARAP1	1	10.1105
NIF3L1	0.777778	13.4715
FOXJ3	0.888889	11.2697
EIF3CL	1	11.524
IRF9	1	17.1621
C1orf186	0.777778	2.75021

## Sheet: Liver
Table S11. Genes that are selectively depleted in specific metastatic sites of CRISPR-CDX-BR16 mice and expressed in the respective organ in the BR16-CDX model. The table shows the genes whose sgRNA specifically dropped out in bone, liver, brain and lymphnode in CRISPR-CDX-BR16 mice, while they are expressed at the RNA level in metastatic cells of the respective organ of BR16-CDX mice.
gene	is_exprs_prop	mean_exprs
ACSM3	0.666667	3.2739
RHOA	1	73.4854
RASAL2	1	5.41833
C1QTNF3	0.666667	0.90082
UQCC1	1	10.2732
KCNN4	1	12.8703
TXNDC15	1	23.8587
C1QL1	0.666667	2.1438
BTG1	1	14.5218
SMARCC2	1	29.234
FANCI	1	401.974
CAPN10	1	3.43856
CTTNBP2NL	0.666667	5.63277
RAB5A	1	9.89579
LSM14B	1	2.45996
RHOC	1	49.5433
CHCHD6	1	28.6594
TCTN2	0.666667	2.27094
MGMT	1	12.0698
C22orf46	0.666667	1.52603
ALDH1A3	1	5.1769
TMEM232	0.666667	2.97997

## Sheet: Lymphnode
Table S11. Genes that are selectively depleted in specific metastatic sites of CRISPR-CDX-BR16 mice and expressed in the respective organ in the BR16-CDX model. The table shows the genes whose sgRNA specifically dropped out in bone, liver, brain and lymphnode in CRISPR-CDX-BR16 mice, while they are expressed at the RNA level in metastatic cells of the respective organ of BR16-CDX mice.
gene	is_exprs_prop	mean_exprs
TSSC1	0.545455	3.62999
RFXANK	0.727273	33.2866
BAMBI	0.727273	7.36647
ABLIM1	0.727273	5.73476
AP1B1	0.545455	2.20586
UQCC1	0.909091	12.4355
UBL4A	0.636364	5.31439
PRKAG2	0.727273	11.9521
WFS1	0.727273	4.07862
CD81	0.818182	26.9739
RND3	0.818182	13.9174
DNAJC16	0.727273	20.1743
RAB9A	0.636364	5.04913
SLC10A3	0.545455	2.55008
TUBGCP2	1	14.0715
TROAP	0.727273	8.12605
SEPT3	0.909091	20.9755
SMARCC2	1	12.9856
GAS8	0.909091	5.49212
CACNA1A	1	24.5782
CAPN10	0.727273	7.95706
CCDC25	0.818182	32.5829
HIST1H2BD	0.545455	3.27951
AP1G1	0.909091	8.32917
NXN	0.818182	7.22656
SRP68	0.818182	11.6605
RBPJ	0.909091	10.5756
ATF7IP	0.818182	16.9848
RELA	0.818182	6.53056
PTPRM	0.545455	7.41879
OPLAH	0.545455	3.22871
ARID3B	0.636364	4.21374
R3HDM2	0.909091	47.8137
B4GALNT4	0.727273	7.32417
TTC3	1	68.3654
ANKFY1	0.818182	3.46497
ITSN2	0.727273	3.41338
FOXJ3	0.636364	3.03867
LYRM9	0.636364	2.07218
